# Supplementary material for: Structural myelin defects are associated with low axonal ATP levels but rapid recovery from energy deprivation in a mouse model of spastic paraplegia
Source: PubMed Central journal article supplement (PMC7704050; doi:10.1371/journal.pbio.3000943), 2020-11-16

## S1\_raw\_images for Trevisol and Kusch *et al.*

### raw data for Trevisol and Kusch *et al.*, figure 6A

primary antibody: rabbit anti-GLUT1

secondary antibody: goat anti-rabbit-DyeLight800

detection at 800nm using a Odyssey Classic Imaging System (Licor)

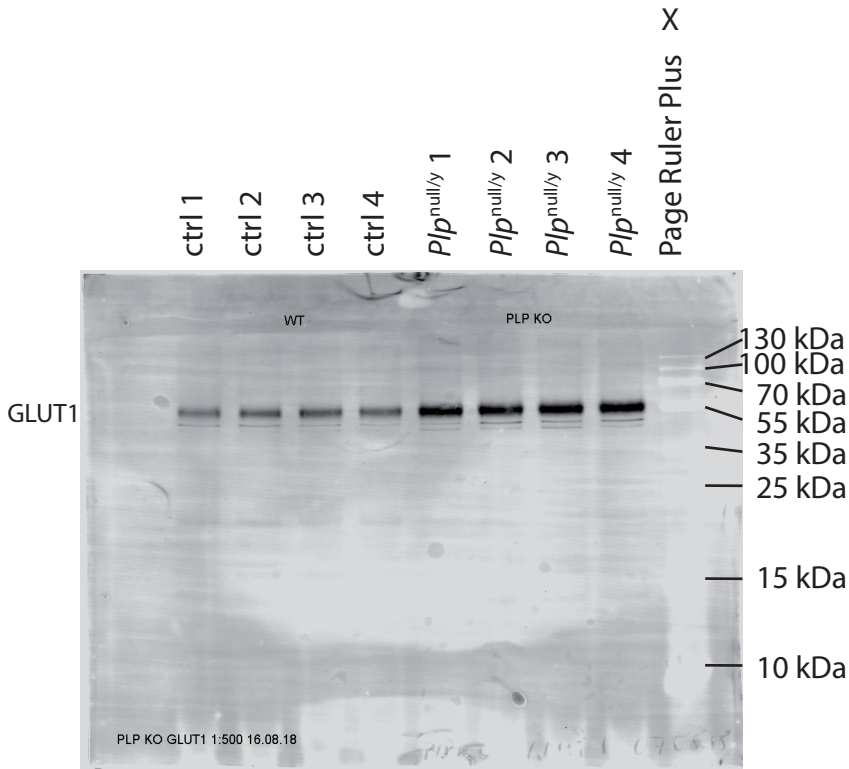

### raw data for Trevisol and Kusch *et al.*, figure 6A

Reprobe of membrane used for GLUT1

primary antibody: rabbit anti-PLP

secondary antibody: goat anti-rabbit-DyeLight700

detection at 800nm using a Odyssey Classic Imaging System (Licor)

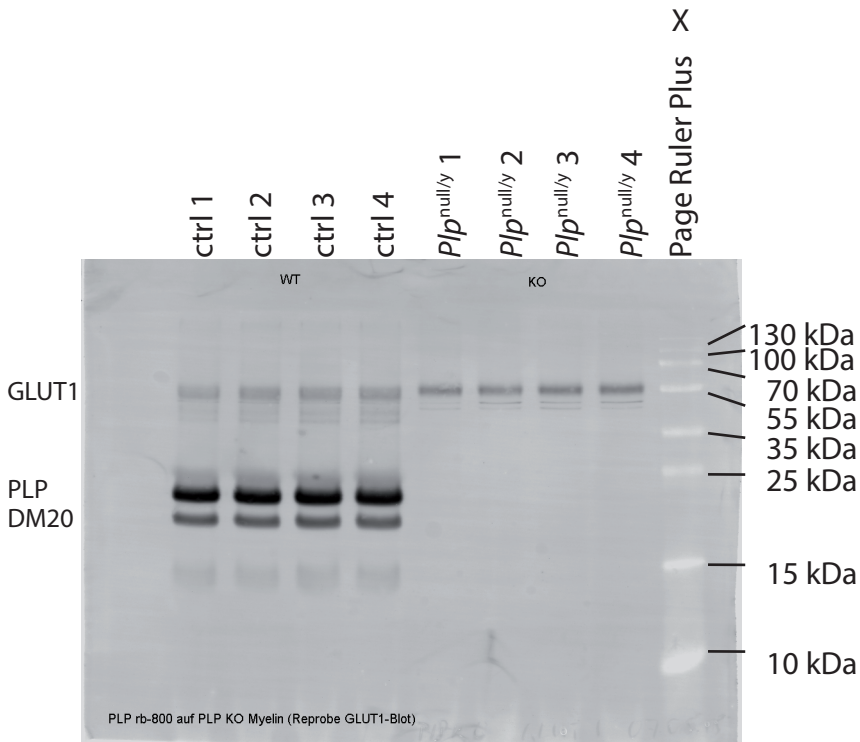

**raw data for Trevisiol and Kusch et al., figure 6A**

primary antibody: rabbit anti-MCT1

secondary antibody: goat anti-rabbit-DyeLight800

detection at 800nm using a Odyssey Classic Imaging System (Licor)

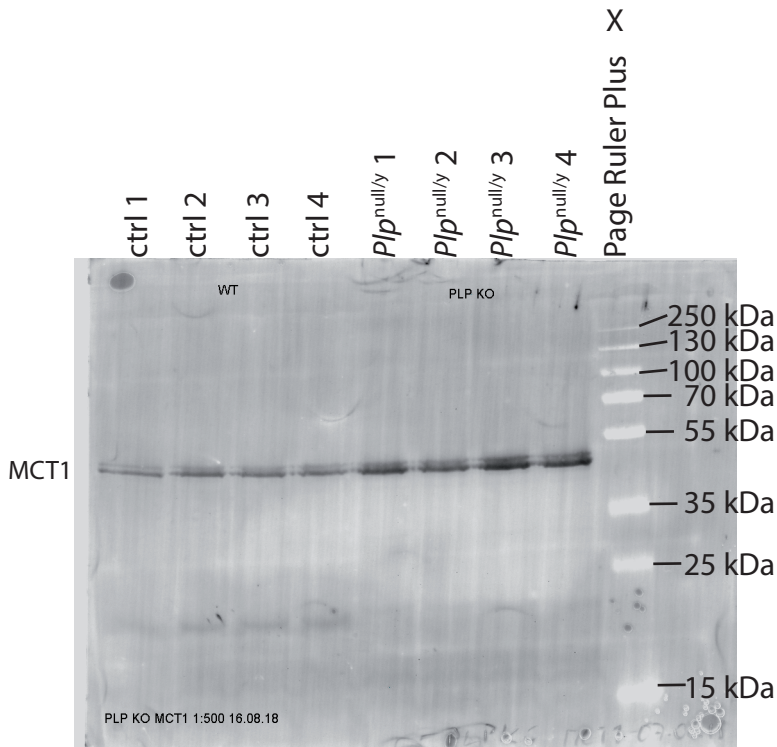

**raw data for Trevisiol and Kusch et al., figure 6A**

Reprobe of membrane used for MCT1

primary antibody: mouse anti-ACTB

secondary antibody: goat anti-mouse-DyeLight700

detection at 700nm using a Odyssey Classic Imaging System (Licor)

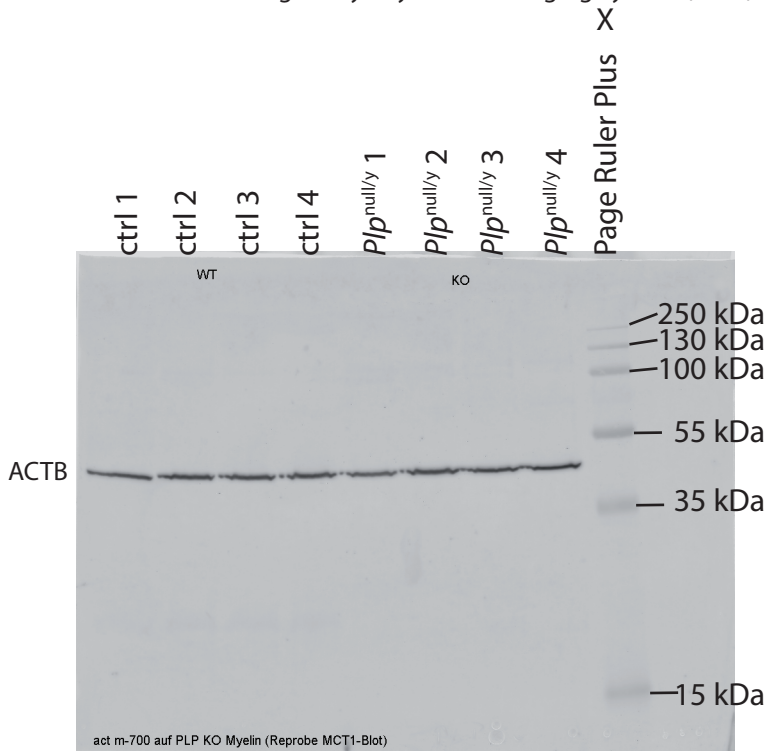

Supplement: pbio.3000943.s009.pdf [file pbio.3000943.s009.pdf]
