# Supplementary material for: Structural myelin defects are associated with low axonal ATP levels but rapid recovery from energy deprivation in a mouse model of spastic paraplegia
Source: PLoS Biol. 2020 Nov 16;18(11):e3000943. doi: 10.1371/journal.pbio.3000943 (PMC7704050; doi:10.1371/journal.pbio.3000943)
Supplement: S1 Data — (XLSX) [file pbio.3000943.s001.xlsx]

## Sheet: Fig1D
Figure 1D
	CAP waveform (μV); average				CAP waveform (μV); individual data
	Plpwt/y		Plpnull/y		Plpnull/y										Plpwt/y
msec	mean	SEM	mean	SEM	n = 1	n = 2	n = 3	n = 4	n = 5	n = 6	n = 7	n = 8	n = 9	n = 10	n = 1	n = 2	n = 3	n = 4	n = 5	n = 6	n = 7	n = 8
0	-0.00273633	0.00335952	0.0027124	0.00248187	-0.00144383	-0.00352057	-0.0324763	0.0039557	0.00417326	-0.00142405	0.00389636	-0.00251187	-0.00520174	0.0069818	0.00375791	0.0109177	0.00025712	0.00199763	-0.0125593	0.0109375	0.00581487	0.000415344
0.01	0.00570117	0.00174552	0.00310303	0.00364025	0.00636867	0.00116693	0.0159612	0.0133307	0.00104826	0.00326345	0.00389636	0.00998813	0.00417326	-0.0023932	0.00844541	0.0156052	0.00025712	0.00512263	-0.0172468	-0.0078125	0.0120649	0.00822785
0.02	-0.00133008	0.00247577	0.00232178	0.00350716	0.00168117	-0.00039557	-0.0168513	0.0055182	-0.00676423	0.00326345	0.0132714	-0.00251187	-0.00832674	-0.0023932	0.0115704	0.00779272	0.00650712	-0.00581488	-0.0172468	-0.003125	0.0151899	0.00354035
0.03	0.00757617	0.00315718	0.00349365	0.00312201	0.00949367	0.00116693	0.0112737	0.0148932	-0.0161392	0.0204509	0.0179589	0.000613133	0.00886076	0.0069818	0.0146954	0.0156052	0.00181962	-0.00112738	-0.0125593	-0.003125	0.00581487	0.00666535
0.04	0.00413867	0.00187727	-0.000803222	0.00223132	0.00480617	0.00741693	0.00814873	0.0039557	-0.00832675	0.00951345	0.00389636	-0.00251187	0.0135483	0.0007318	0.00375791	0.00466773	-0.00443038	-0.00268987	-0.0109968	0.0015625	0.00893987	-0.00739715
0.05	0.00195117	0.00331977	0.00759521	0.0025385	0.00793117	0.00429193	-0.0199763	0.0086432	0.00573576	0.0126384	0.0117089	-0.00251187	-0.0145767	0.0054193	0.00375791	0.0156052	0.00806962	0.00199763	-0.00630933	0.0171875	0.0105024	0.00979034
0.06	0.00304492	0.000892223	0.0058374	0.00213125	0.00793117	0.00272943	0.00502374	0.000830698	-0.00207674	0.00170095	0.00233386	0.000613133	0.00417326	0.0069818	-0.00717959	0.0124802	0.0111946	0.00981013	0.00306566	0.00625	0.00893987	0.00197785
0.07	7.61719e-05	0.00177747	0.00251709	0.00173783	0.00636867	0.00272943	0.00502374	0.0023932	-0.00207674	-0.00923655	0.00858386	-0.00251187	-0.00832674	-0.0023932	-0.00249209	0.00310523	0.00806962	0.00512263	0.00462816	0.0046875	-0.00824763	0.00510285
0.08	0.000701171	0.00201659	0.000368651	0.00236993	0.000118671	0.00272943	-0.00435127	-0.000731806	0.00729825	-0.00923655	0.0148339	0.00217563	-0.00520174	-0.000830698	-0.000929589	-0.00314479	0.00806962	0.00824763	0.00775316	-0.0015625	-0.00356013	-0.0120847
0.09	0.000701172	0.00185976	0.00290772	0.00288243	0.00168117	0.00272943	-0.00122627	0.0070807	-0.000514239	-0.0123616	0.0117089	0.000613133	-0.000514239	-0.0023932	-0.00249209	0.00154273	0.00338212	0.0144976	0.00619067	0.0015625	0.0120649	-0.0136472
0.1	-0.00133008	0.00127621	0.00407959	0.00293648	0.00480617	-0.00195807	-0.00122627	-0.0038568	0.00573576	-0.00142405	0.000771365	-0.00251187	-0.00676424	-0.00708069	-0.00561709	0.0171677	0.00963212	0.000435128	-0.00318434	0.015625	0.00112737	-0.00270965
0.11	-0.00304883	0.00235769	0.00134521	0.00255255	0.00636867	-0.00352057	-0.0184138	0.0023932	-0.000514239	0.00326345	-0.00547864	-0.00719937	0.00417326	-0.0117682	0.00532041	-0.00314479	0.0127571	0.00356013	0.00150316	-0.0125	-0.00356013	0.00666535
0.12	-0.00554883	0.00290713	-0.000217286	0.00165556	0.00168117	-0.00508307	-0.00747627	-0.0022943	0.00573576	-0.00142405	-0.00391614	-0.00563687	-0.00676424	-0.0305182	0.00532041	-0.00158229	0.00494462	0.00512263	-0.00474684	-0.0015625	-0.00824763	-0.00114715
0.13	-8.00773e-05	0.00273697	0.00368897	0.00199934	-0.00300633	-0.00508307	0.0159612	-0.0038568	0.0135483	0.00013845	0.000771365	-0.0134494	0.00261076	-0.0086432	0.00688291	-1.97695e-05	0.00963212	0.00356013	-5.93359e-05	0.0125	-0.00668513	0.00354035
0.14	-0.000548829	0.00413694	0.000954591	0.0018918	0.00636867	-0.00664557	-0.0371638	0.0117682	0.00417326	0.00170095	0.00858386	0.00217563	0.00261076	0.0007318	-0.000929589	-1.97695e-05	0.00963212	0.00512263	0.00150316	-0.009375	0.00425238	-0.00270965
0.15	-0.00398633	0.00275946	0.00193115	0.00280486	0.00636867	-0.00195807	-0.0277888	0.000830698	0.00104826	0.00013845	-0.00391614	-0.00251187	-0.00520174	-0.00708069	-0.00405459	-0.00783228	-0.00755538	0.00199763	0.00931566	0.0171875	0.00268987	0.00354035
0.16	0.00445117	0.00254371	0.00173584	0.00131683	0.00324367	-0.00977057	0.0143987	0.0086432	-0.00520173	0.00638845	0.00545886	-0.00251187	0.00573576	0.0179193	0.00532041	-0.00470728	0.00338212	0.00668513	0.00462816	0.0015625	-0.000435125	-0.00270965
0.17	0.00445117	0.00222075	0.00154053	0.00158346	0.00636867	-0.00039557	-0.00122627	0.0023932	-0.00988925	0.00482595	0.0163964	0.00998813	0.0119858	0.00385681	0.00844541	-0.00626978	-0.00130538	0.00199763	0.00306566	-0.003125	0.00425238	0.00510285
0.18	0.00179492	0.00231604	0.00251709	0.00180856	0.00793117	0.00585443	0.00189873	0.0023932	-0.00207674	-0.00611155	0.0195214	-0.00251187	-0.00363924	-0.00551819	0.0131329	-1.97695e-05	-0.00130538	-0.00112738	0.00619067	0.00625	-0.000435125	-0.00270965
0.19	0.00116992	0.00148006	-0.00275635	0.00112724	0.00636867	-0.00195807	0.00502374	-0.000731806	-0.00676423	0.00326345	-0.000791143	-0.000949367	-0.00207674	0.0101068	-0.00249209	0.00154273	-0.00755538	-0.00425237	-0.00474684	-5.74709e-10	0.00112737	-0.00583465
0.2	-0.00289258	0.0022946	0.000368652	0.00313952	0.00480617	0.00116693	-0.00591376	-0.0101068	-0.00520173	0.014201	-0.00704114	-0.00407437	-0.00988924	-0.00708069	0.00375791	-0.00158229	-0.0184929	0.00824763	-0.00630933	0.0125	0.00268987	0.00197785
0.21	0.00257617	0.00228493	0.00329834	0.00257177	0.00324367	0.00116693	0.0190862	0.0055182	-0.00363924	0.00951345	-0.00704114	0.00217563	-0.000514239	-0.0039557	-0.000929589	-0.00314479	-0.00286788	0.0144976	-5.93359e-05	0.0078125	-0.00356013	0.0144778
0.22	0.00226367	0.00194102	0.00447022	0.00300981	0.00793117	-0.00664557	-0.00278877	0.0133307	-0.00676423	0.00326345	0.00389636	-0.000949367	0.00573576	0.0054193	0.00219541	-0.0140823	0.00494462	0.0160601	0.00619067	0.0140625	0.00112737	0.00510285
0.23	0.00366992	0.00215116	-0.000217285	0.00370773	0.00636867	-0.00352057	0.00346123	0.0055182	-0.00363924	0.00795095	0.0163964	0.000613133	0.0104233	-0.00708069	0.00375791	-0.00470728	-0.00130538	0.00199763	0.00150316	0.021875	-0.0176226	-0.00739715
0.24	0.00726367	0.00335373	-0.00119385	0.00372919	0.00168117	-0.00195807	0.0347112	0.0117682	-0.00207674	-0.00142405	0.0132714	0.00217563	0.00417326	0.0101068	0.00688291	0.00935522	-0.00755538	0.00824763	0.00931566	-0.0203125	-0.00512263	-0.0105222
0.25	-0.00101758	0.00295481	0.00232178	0.00240315	-0.0155063	0.00116693	-0.0184138	0.0055182	-0.000514239	0.00638845	0.0148339	-0.000949367	-0.000514239	-0.0023932	0.000632911	0.00623022	-0.00911788	-0.00268987	0.0124407	0.003125	0.0105024	-0.00270965
0.26	-0.00117383	0.00255441	0.00544678	0.00241621	-0.0139438	-0.00195807	0.00189873	0.0070807	0.00886075	-0.00611155	-0.0101661	0.00842563	-0.00988924	0.00385681	0.0115704	0.00154273	0.00338212	-0.00581488	0.0171282	0.00625	-0.000435125	0.00979034
0.27	0.000701171	0.00359152	0.000954591	0.00267759	0.000118671	-0.0128956	0.0237737	0.0055182	0.00886075	-0.00454905	-0.0179786	-0.00563687	0.00104826	0.0085443	0.00219541	-1.97695e-05	0.00338212	0.00199763	0.00306566	-0.0171875	0.00268987	0.0113529
0.28	-0.00445508	0.00226663	0.000173341	0.00313312	0.00168117	-0.0113331	-0.0121638	0.0055182	-0.00207674	-0.00454905	-0.0132911	0.000613133	0.00417326	-0.0133307	0.00375791	-0.0140823	0.00494462	0.00668513	0.00306566	0.0078125	-0.0160601	0.00510285
0.29	-0.000705078	0.00201388	-0.00138916	0.00360724	0.0141812	-0.00508307	0.000336235	-0.0069818	0.00261076	-0.00298655	-0.00547864	0.000613133	0.00417326	-0.0086432	0.000632911	-0.0125198	0.0111946	0.0144976	-0.00787184	-0.0078125	-0.0144976	0.00510285
0.3	0.00210742	0.00219956	0.000759278	0.00259123	0.0126187	-0.00195807	0.000336235	0.0039557	0.00573576	-0.00298655	-0.00547864	0.000613133	0.0151108	-0.00708069	-0.00561709	-0.00783228	0.00338212	0.00981013	-5.93359e-05	0.0015625	-0.00824763	0.0129154
0.31	0.00288867	0.00315988	-0.0035376	0.00192358	0.00324367	-0.00195807	-0.00278877	0.0117682	0.0197983	-0.010799	-0.00235364	0.0178006	0.00261076	-0.0086432	0.00219541	-0.00626978	0.00338212	0.00356013	-0.00474684	-0.00625	-0.0113726	-0.00895966
0.32	0.00429492	0.00252817	-0.00119385	0.00292601	0.00168117	-0.00820807	0.00971124	0.0023932	0.0166733	-0.00298655	-0.000791143	0.0131131	0.0135483	-0.0023932	0.00375791	0.00466773	0.00338212	0.0113726	-0.0141218	-0.0125	-0.00199763	-0.00427215
0.33	0.000701171	0.00249508	-0.00412353	0.0039118	0.00324367	-0.00508307	-0.0121638	0.0117682	0.00729825	-0.00767405	0.00389636	0.00686313	0.00729826	-0.0086432	0.00375791	-1.97695e-05	0.00963212	0.00512263	-0.00943433	-0.0015625	-0.0144976	-0.0261471
0.34	0.000232421	0.00206292	-0.00392822	0.00390328	-0.00144383	0.00116693	-0.0137263	0.0086432	0.00261076	0.00326345	0.00545886	-0.000949367	0.00573576	-0.0086432	0.00375791	0.00779272	0.00494462	0.00356013	-0.00318434	-0.025	-0.0176226	-0.00583465
0.35	0.00116992	0.00335356	-0.000217286	0.00345612	0.00480617	0.00116693	0.0190862	0.0180182	-0.0130142	0.00326345	-0.0148536	-0.00251187	-0.00207674	-0.0023932	-0.000929589	-0.00158229	0.0127571	0.0144976	-0.00943433	0.003125	-0.00356013	-0.0167721
0.36	-0.00195508	0.00287475	-0.000217286	0.00231715	0.000118671	0.00116693	-0.00591376	0.0102057	-0.000514239	0.00638845	-0.0179786	0.00530063	-0.0177017	-0.000830698	0.00375791	-0.00626978	-0.00443038	0.0129351	-0.00474684	0.00625	-0.00356013	-0.00583465
0.37	-0.000392578	0.00332789	-0.00470947	0.00311524	0.00636867	-0.00352057	-0.0215388	0.0195807	-0.000514239	-0.00142405	-0.00704114	0.000613133	-0.00676424	0.0101068	0.00375791	-0.00158229	-0.00443038	0.00981013	-0.00787184	-0.021875	-0.00824763	-0.00739715
0.38	0.00195117	0.00207871	-0.00158447	0.00301142	0.00480617	-0.00352057	0.0159612	-0.000731806	0.00729825	-0.00142405	0.000771365	-0.00251187	-0.00832674	0.0069818	-0.0118671	-0.00783228	0.00963212	0.00668513	-0.00943433	0.0078125	0.00268987	-0.0105222
0.39	0.00148242	0.00213644	0.00310303	0.00208791	-0.00144383	0.00116693	0.000336235	-0.0038568	0.0151108	-0.00611155	0.00858386	0.00217563	-0.00832674	0.0069818	0.00375791	0.00466773	0.00338212	0.0113726	0.00306566	0.009375	-0.00199763	-0.00895966
0.4	0.00413867	0.00245106	0.00173584	0.00205108	0.00324367	0.00272943	0.00971124	0.0039557	0.00261076	-0.0170491	0.0132714	0.00530063	0.00729826	0.0101068	-0.00405459	-1.97695e-05	-0.00130538	0.00356013	0.00619067	0.0125	0.00425238	-0.00739715
0.41	-0.00320508	0.00340102	-0.000412598	0.00261618	-0.0155063	0.00272943	0.0237737	-0.0038568	-0.000514239	-0.0123616	-0.00235364	-0.0118869	-0.000514239	-0.0117682	-0.0103046	-0.00939478	-0.00130538	-0.00268987	0.00931566	0.0125	-0.000435125	-0.00114715
0.42	-0.00117383	0.00248427	-0.0019751	0.00207204	-0.0139438	0.00116693	-0.0121638	0.000830698	0.00104826	-0.00923655	0.00233386	0.000613133	0.0135483	0.00385681	0.00375791	-1.97695e-05	0.00025712	-0.00425237	-5.93359e-05	-0.015625	-0.00356013	0.00354035
0.43	-0.00226758	0.00235296	0.00290771	0.00176026	-0.0155063	-0.00195807	0.00814873	-0.0116693	0.00261076	0.00326345	-0.00547864	-0.00719937	0.00729826	-0.0023932	0.000632911	-0.00314479	0.00650712	0.00199763	0.00462816	0.0125	0.00425238	-0.00427215
0.44	-0.00179883	0.00188023	0.00173584	0.00199283	-0.0108188	0.00116693	-0.00122627	0.0023932	-0.00207674	0.00951345	-0.0117286	-0.00407437	-0.000514239	-0.000830698	0.0100079	0.00623022	-0.00130538	-0.00581488	0.00931566	-5.74709e-10	-0.00356013	-0.00114715
0.45	-0.00539258	0.00238183	0.00368897	0.00220831	-0.0155063	0.00272943	-0.0168513	-0.0116693	-0.00207674	0.00170095	-0.0132911	0.000613133	-0.000514239	0.0007318	0.000632911	0.00154273	-0.00443038	0.00824763	0.00150316	0.015625	0.00893987	-0.00270965
0.46	0.00132617	0.00356614	-0.00275635	0.00196999	-0.00144383	0.00897943	0.0206487	-0.0147943	-0.00520173	0.00795095	-0.0101661	0.0146756	-0.0114517	0.00385681	-0.00561709	-0.0109573	-0.00130538	0.00199763	-5.93359e-05	-0.0109375	0.00581487	-0.00114715
0.47	0.00554492	0.00353302	-0.00627197	0.00458331	0.00949367	0.00429193	0.0284612	-0.00541931	-0.0161392	0.00951345	0.00858386	0.0115506	-0.00207674	0.0069818	-0.0134296	0.00154273	0.00338212	0.000435128	0.00619067	-0.0359375	-0.0113726	-0.00114715
0.48	-0.00492383	0.00402455	-0.00217041	0.00256388	-0.00144383	-0.00195807	-0.0356013	-0.0116693	-0.0177017	0.00482595	0.000771365	-0.000949367	0.00417326	0.0101068	-0.0134296	-0.00939478	-0.00443038	-0.00268987	-5.93359e-05	0.0125	0.00268987	-0.00270965
0.49	-0.00195508	0.00331079	-0.000998535	0.00101371	-0.00300633	-0.00195807	-0.00591376	-0.0132318	-0.00988925	0.00170095	0.00545886	0.0209256	0.00417326	-0.0180182	-0.00249209	0.00310523	-0.00130538	0.000435128	0.00150316	-0.00625	-0.00356013	0.000415344
0.5	0.00132617	0.00289729	0.00251709	0.00237583	-0.0123813	-0.00195807	0.0175237	0.000830698	-0.00988925	-0.00142405	0.00233386	-0.00251187	0.00417326	0.0163568	0.00219541	0.0124802	0.00806962	-0.00425237	0.00619067	-0.009375	0.00581487	-0.00114715
0.51	-0.00383008	0.00237491	0.000563964	0.00186048	-0.00613133	-0.00664557	-0.0168513	-0.00541931	-0.00520173	0.00951345	-0.0117286	0.00530063	0.00261076	-0.0039557	-0.00249209	0.00466773	-0.00130538	-0.00581488	0.00619067	-0.00625	0.00893987	0.000415344
0.52	-0.00101758	0.00230219	0.00310303	0.00287948	0.00324367	0.00272943	-0.00747627	-0.0116693	0.00261076	0.0110759	-0.0117286	0.000613133	-0.00520174	0.0054193	0.00532041	0.00466773	0.00338212	-0.00425237	0.0124407	-0.0125	0.00112737	0.0144778
0.53	0.00132617	0.00201604	0.00251709	0.0017414	0.00793117	0.00272943	-0.0106013	0.0039557	0.00104826	0.00951345	-0.00860364	-0.00251187	0.00573576	0.00385681	-0.00717959	0.00154273	0.00025712	0.00824763	0.00462816	-0.0015625	0.00737737	0.00666535
0.54	0.00241992	0.00260015	-0.00217041	0.00261251	0.00949367	0.00897943	-0.00278877	0.000830698	0.00261076	0.00795095	-0.0101661	0.0146756	0.00417326	-0.0117682	-0.00405459	0.00935522	-0.00443038	-0.0167524	-0.00162183	-0.00625	0.00425238	0.00197785
0.55	0.00257617	0.00138679	-0.000217284	0.00376857	0.00949367	-0.00508307	0.00814873	0.0023932	0.00417326	0.00013845	-0.00391614	0.00217563	0.00417326	0.00385681	0.00219541	0.0156052	0.00338212	-0.0120649	-0.00318434	-0.01875	-0.000435125	0.0113529
0.56	-0.00226758	0.00256005	-0.00236572	0.00207428	0.0173062	-0.00664557	-0.00591376	-0.0147943	0.00417326	-0.00142405	-0.00860364	-0.00251187	-0.00363924	-0.000830698	-0.00249209	-0.00314479	-0.00599288	-0.00268987	-0.00474684	0.0125	-0.00824763	-0.00427215
0.57	-0.00351758	0.00220612	-0.00314697	0.00278229	0.00793117	-0.00820807	-0.00903877	-0.0163568	0.00261076	-0.00767405	-0.00235364	0.000613133	0.00417326	-0.00708069	0.00844541	-0.00314479	-0.0106804	0.00824763	-0.00162183	-0.015625	-0.00668513	-0.00427215
0.58	-0.00320508	0.00225364	-0.00295166	0.00243422	0.00636867	-0.00820807	-0.0199763	-0.0038568	-0.00207674	-0.00767405	-0.000791143	-0.000949367	-0.000514239	0.0054193	0.000632911	-0.00158229	-0.0169304	-0.00425237	0.00462816	-0.009375	-0.00199763	0.00510285
0.59	-0.00351758	0.00152395	0.00154053	0.00404822	0.00168117	-0.00352057	0.00189873	-0.0069818	-0.00676423	-0.00923655	-0.00391614	0.00373813	-0.0114517	-0.000830698	0.00375791	-0.00470728	-0.0106804	-0.0151899	0.00775316	0.021875	0.0120649	-0.00270965
0.6	0.00257617	0.00503376	-0.000803224	0.00522134	-0.00300633	-0.00664557	0.0487737	0.000830698	-0.00832675	0.00170095	0.00233386	0.00217563	-0.00832674	-0.0039557	0.00844541	0.0124802	-0.00286788	-0.0136274	0.00775316	-0.028125	-0.00981013	0.0191653
0.61	-0.00445508	0.00230759	-0.00431885	0.00227968	-0.00613133	-0.00195807	-0.00278877	-0.0085443	-0.0145767	0.0126384	-0.0132911	-0.00251187	-0.00676424	-0.000830698	0.00375791	-0.0109573	-0.0122429	-0.00425237	-0.0109968	-0.00625	0.00268987	0.00354035
0.62	-0.00429883	0.00304322	-0.00314697	0.00248	0.00168117	-0.00195807	-0.0277888	-0.0038568	-0.00207674	0.00951345	-0.00860364	0.000613133	0.00104826	-0.0117682	0.000632911	-0.0125198	-0.00443038	-0.00893987	-0.00787184	0.009375	-0.00668513	0.00510285
0.63	0.00320117	0.00264328	-0.000217286	0.00211376	0.000118671	-0.00664557	0.0222112	0.0023932	-0.000514239	0.00013845	-0.00391614	-0.000949367	0.0151108	0.00385681	0.00688291	-0.00314479	0.00494462	0.000435128	-0.00318434	-0.0109375	0.00737737	-0.00427215
0.64	0.00179492	0.00217146	0.0027124	0.00323224	0.00480617	-0.00352057	0.0112737	-0.0116693	0.00729825	0.00482595	-0.00391614	-0.00251187	0.0104233	0.0007318	-0.00249209	0.00310523	0.00338212	-0.00112738	-0.00318434	0.0109375	0.0214399	-0.0105222
0.65	0.00273242	0.00114635	0.00622803	0.0030092	0.00168117	-0.00352057	0.00189873	0.0039557	0.00261076	0.00326345	0.0101464	-0.00251187	0.00417326	0.0054193	0.00219541	0.0140427	0.00963212	-0.00268987	0.00931566	0.0015625	0.0214399	-0.00583465
0.66	0.00132617	0.00276889	-0.000803223	0.00372577	-0.00456883	0.00116693	0.00658623	0.000830698	-0.00207674	-0.00611155	0.0179589	-0.0150119	0.00261076	0.0116693	-0.00717959	0.00623022	0.00494462	-0.00581488	0.00150316	-0.0140625	0.0198774	-0.0120847
0.67	-0.00117383	0.00221337	-0.000607909	0.00202687	0.000118671	0.0136669	0.000336235	-0.0022943	0.00261076	-0.010799	0.00545886	-0.0103244	-0.00676424	-0.0039557	-0.0118671	0.00310523	0.00338212	-0.00581488	0.00150316	-0.0046875	0.00425238	0.00510285
0.68	0.00148242	0.00266752	0.000759277	0.00260555	0.00324367	0.00272943	0.0143987	0.0055182	-0.000514239	-0.00923655	0.00233386	-0.0103244	-0.00832674	0.0147943	-0.00717959	0.00935522	0.00494462	0.00199763	-5.93359e-05	-0.009375	0.0120649	-0.00583465
0.69	0.000388673	0.00379325	-2.19738e-05	0.00194435	-0.00144383	0.0121044	0.0222112	-0.0038568	-0.00676423	0.00482595	-0.0101661	-0.0134494	-0.0145767	0.0147943	-0.0118671	-0.00314479	0.00025712	0.000435128	-5.93359e-05	0.0078125	0.00581487	0.000415344
0.7	0.00241992	0.00319156	0.000954591	0.00218754	0.00324367	0.0121044	-0.00435127	0.0086432	-0.000514239	0.00638845	-0.00235364	0.0178006	-0.0208267	0.00385681	-0.00405459	-1.97695e-05	0.00025712	0.00199763	0.00306566	0.015625	-0.00512263	-0.00427215
0.71	-0.00336133	0.00387489	-0.00177979	0.00142224	-0.00769383	0.00272943	-0.0309138	0.0039557	-0.00207674	0.00482595	0.000771365	0.0146756	-0.0177017	-0.0023932	-0.000929589	-0.00158229	0.00025712	0.00512263	-0.00162183	-0.003125	-0.00199763	-0.0105222
0.72	0.00179492	0.00274779	-0.000217284	0.00153479	-0.0123813	0.0152294	-0.00435127	0.0070807	-0.00207674	-0.00298655	0.0117089	0.0115506	-0.00676424	0.0007318	0.000632911	0.00154273	-0.00443038	0.00512263	-0.00630933	0.0046875	0.00268987	-0.00583465
0.73	0.00679492	0.00366786	0.00154053	0.00269877	-0.00769383	0.0136669	0.0237737	0.0070807	-0.00363924	-0.00142405	0.0242089	0.00373813	-0.00832674	0.0163568	0.0100079	-0.00470728	0.00806962	-0.00581488	-5.93359e-05	0.0140625	-0.00824763	-0.00114715
0.74	0.00163867	0.00268577	-2.19733e-05	0.0030922	-0.0155063	0.0105419	-0.00903877	0.0023932	0.00104826	0.00795095	-0.000791143	0.00217563	0.0151108	0.00229431	-0.00249209	-0.00158229	0.0111946	-0.0167524	0.00150316	-5.74709e-10	-0.00512263	0.0129154
0.75	0.00101367	0.00311776	0.00154053	0.00407136	-0.00769383	0.00741693	-0.00122627	0.0195807	0.00729825	-0.00298655	-0.0164161	-0.000949367	0.0104233	-0.00551819	-0.00561709	0.0124802	0.00963212	-0.0214399	0.00306566	0.0046875	-0.00668513	0.0160403
0.76	0.00273242	0.00251971	0.00193115	0.00292323	-0.0139438	0.0105419	0.00502374	0.0070807	0.00886075	0.00638845	-0.00704114	0.000613133	0.0119858	-0.0023932	0.00375791	-0.0109573	0.00963212	-0.00737737	0.00306566	-0.0046875	0.00737737	0.0144778
0.77	0.000232421	0.00307345	0.0011499	0.00342269	-0.00300633	0.00897943	-0.0184138	-0.0022943	0.00417326	0.00951345	-0.00391614	0.000613133	0.0166733	-0.0102057	0.00219541	-0.0109573	-0.00443038	0.00356013	-0.0125593	0.0015625	0.0136274	0.0160403
0.78	-0.000548829	0.00147839	0.00173584	0.00253441	-0.00613133	0.00272943	0.00658623	-0.0022943	0.00261076	0.00326345	-0.000791143	0.00217563	-0.00832674	-0.00551819	0.000632911	0.00935522	-0.00130538	0.000435128	-0.0141218	0.003125	0.00581487	0.00979034
0.79	0.000857421	0.00194465	0.00368896	0.00395399	-0.00300633	0.00429193	0.00189873	-0.0085443	0.00573576	-0.010799	0.00858386	0.00373813	0.00729826	-0.000830698	-0.00561709	0.0171677	0.0127571	0.00356013	-0.0188093	-0.0015625	0.0120649	0.00979034
0.8	-0.00586133	0.00254519	-2.1973e-05	0.00247903	-0.00144383	0.00116693	-0.0137263	-0.0101068	0.00417326	-0.00923655	-0.00391614	-0.00251187	-0.0239517	0.0007318	-0.00717959	0.0140427	-0.00443038	-0.00737737	-0.00318434	0.00625	-0.00199763	0.00354035
0.81	-0.00367383	0.00199517	0.00193115	0.00270675	0.000118671	-0.00664557	-0.0152888	-0.0085443	-0.000514239	-0.00767405	0.00858386	-0.00251187	-0.00676424	0.00229431	-0.00561709	0.0109177	-0.00911788	-0.00737737	0.00306566	0.0078125	0.0105024	0.00510285
0.82	0.000544924	0.00240781	0.00134522	0.00286168	0.000118671	0.00272943	0.0143987	-0.0085443	0.0135483	-0.00767405	0.000771365	-0.00251187	-0.000514239	-0.00708069	-0.00561709	0.00623022	-0.00599288	-0.00893987	-0.00474684	0.0125	0.0120649	0.00510285
0.83	0.00163867	0.0018882	-0.00158447	0.00281313	-0.00456883	-0.00039557	0.0112737	0.0039557	0.0104233	-0.00923655	0.00389636	-0.00251187	0.00261076	0.0007318	0.000632911	0.0109177	-0.0106804	-0.00737737	-5.93359e-05	-0.00625	-0.00981013	0.00979034
0.84	-0.00586133	0.00494467	-0.00138916	0.00258379	-0.00300633	-0.00195807	-0.0496638	-0.0038568	-0.000514239	0.00326345	-0.000791143	-0.0134494	0.00104826	0.0101068	-0.00874209	-1.97695e-05	-0.00286788	-0.00112738	-0.00787184	0.0125	-0.00981013	0.00666535
0.85	-0.00664258	0.002421	-0.00119385	0.00332983	-0.00925633	0.00272943	0.00502374	-0.0132318	-0.000514239	-0.00611155	-0.00704114	-0.0165744	-0.0192642	-0.0023932	-0.00405459	-0.00314479	-0.0106804	0.000435128	-0.00943433	0.021875	-0.000435125	-0.00427215
0.86	0.00304492	0.00188673	-0.0051001	0.00267744	0.00636867	0.00116693	0.00971124	-0.00541931	-0.00207674	0.00170095	0.0163964	-0.000949367	-0.000514239	0.00385681	0.00375791	0.00623022	-0.0122429	-0.00425237	-0.0109968	-0.0171875	-0.00199763	-0.00427215
0.87	0.00101367	0.00241468	-0.00275635	0.0035361	0.00793117	0.00272943	-0.00122627	-0.0038568	-0.00988925	0.00013845	0.0148339	-0.0118869	0.00573576	0.0054193	-0.00249209	-0.00314479	-0.00599288	-0.0105024	-0.00318434	0.01875	0.00268987	-0.0183346
0.88	0.00445117	0.00337426	-0.00217041	0.00248952	0.00636867	-0.00195807	0.0268987	-0.0022943	-0.00832675	-0.00611155	0.0210839	0.00217563	0.00417326	0.00229431	0.00219541	-0.00626978	-0.00911788	-0.0105024	0.00775316	0.0078125	-0.000435125	-0.00895966
0.89	-0.00211133	0.00295649	-0.0019751	0.00259312	0.00793117	0.00272943	-0.00591376	-0.0038568	-0.00832675	-0.0139241	0.0117089	-0.0196994	0.00417326	0.00385681	-0.00249209	-0.0109573	0.00494462	0.000435128	0.0124407	-0.00625	-0.00356013	-0.0105222
0.9	-0.00164258	0.00325016	-0.00158447	0.00243439	0.00793117	0.00272943	0.00189873	-0.0132318	-0.00832675	-0.020174	0.0132714	-0.0118869	0.00729826	0.00385681	-0.00561709	-0.0156448	0.00025712	0.00356013	0.00462816	0.0078125	-0.00199763	-0.00583465
0.91	0.00116992	0.00301193	-0.00119385	0.00264365	0.00636867	0.00116693	0.0206487	-0.0022943	-0.00988925	-0.00611155	-0.000791143	-0.0118869	0.0135483	0.0007318	0.00375791	-0.00626978	-0.00911788	-0.00893987	0.00462816	-0.0015625	0.0136274	-0.00583465
0.92	-0.00179883	0.00375481	0.00486084	0.00305607	0.000118671	0.00429193	-0.00591376	-0.0069818	-0.0145767	-0.00298655	-0.0101661	-0.0181369	0.0229233	0.0132318	0.00219541	-0.00314479	0.0143196	0.00512263	-0.00162183	0.0015625	0.0230024	-0.00270965
0.93	-0.00398633	0.00312048	0.0042749	0.00432286	0.00636867	0.00272943	-0.00591376	-0.0069818	-0.0161392	0.00795095	-0.0226661	-0.0118869	0.00261076	0.00385681	-0.00874209	-0.00158229	0.00494462	0.00199763	0.00150316	0.0328125	0.0105024	-0.00739715
0.94	-0.000392578	0.00171965	0.000368651	0.00223895	-0.00456883	0.00272943	-0.00747627	-0.0022943	-0.000514239	-0.00923655	0.00233386	0.000613133	0.0104233	0.00385681	-0.0103046	-0.00314479	0.00025712	-0.00268987	-0.00162183	0.0109375	0.00893987	0.000415344
0.95	0.00038867	0.00223478	-0.00373291	0.00267117	0.00324367	0.00116693	0.0128362	-0.0101068	-0.00832675	-0.00611155	-0.00235364	-0.000949367	0.00417326	0.0101068	-0.0165546	-0.00626978	-0.00130538	-0.00893987	-0.00318434	-0.0015625	0.0120649	-0.00427215
0.96	0.000701173	0.00323967	0.000563964	0.00434801	-0.00300633	0.00272943	0.0284612	-0.0116693	-0.00520173	-0.00611155	0.00233386	0.00373813	-0.000514239	-0.0039557	-0.0118671	-0.00314479	-0.00911788	-0.00893987	-0.00318434	0.028125	0.00268987	0.00979034
0.97	0.000701172	0.00497011	-0.00256103	0.00229721	-0.00144383	0.00429193	-0.0371638	0.0133307	-0.0145767	0.00170095	-0.000791143	0.00686313	0.0213608	0.0132318	-0.00717959	0.00310523	0.00650712	-0.0120649	-0.00787184	-0.0078125	0.00112737	0.00354035
0.98	0.00132617	0.00199397	-0.00119385	0.00187805	0.00324367	0.00272943	0.00971124	0.0102057	-0.0114517	-0.00298655	0.00389636	0.00373813	-0.000514239	-0.00551819	-0.0103046	-0.00158229	0.00650712	-0.00425237	0.00462816	-0.00625	0.00268987	-0.00114715
0.99	0.00570117	0.00281119	0.00232178	0.00247451	0.00636867	0.00741693	0.0190862	0.0039557	-0.0130142	0.00326345	0.00702136	-0.00251187	0.00573576	0.0194818	-0.00249209	0.00466773	0.0127571	-0.00112738	0.0124407	-0.0078125	-0.00356013	0.00354035
1	0.00351367	0.00180003	0.00232178	0.00272803	0.00793117	-0.00039557	0.000336235	0.0133307	-0.00832675	0.00795095	0.00233386	0.00373813	0.00104826	0.0069818	-0.0118671	-0.00626978	0.0127571	0.00981013	0.00619067	0.0015625	-0.000435125	0.00666535
1.01	-0.0375801	0.00774751	-0.0269751	0.0111388	-0.0326938	-0.0207081	-0.0231013	-0.0726068	-0.0505142	-0.060799	-0.0632911	-0.0478244	0.0104233	-0.0148932	-0.0243671	-0.0625198	-0.0606804	-0.0433149	-0.0578718	0.0125	0.0120649	0.00822785
1.02	0.690389	0.107634	0.444119	0.144873	0.770431	0.665229	0.783149	1.04146	0.768236	0.882951	0.950771	0.955301	0.0494858	0.0366693	0.450633	0.904668	0.80182	0.669185	0.890566	0.0015625	-0.0519976	-0.113647
1.03	0.277889	0.133811	0.0591577	0.163998	0.339181	0.244917	0.403461	0.785206	0.349486	0.582951	0.566396	0.525613	-0.631764	-0.386768	-0.0384296	0.515605	0.49557	0.35981	0.603066	-0.4125	-0.420748	-0.629272
1.04	-0.751486	0.0623617	-0.522092	0.0686783	-0.412381	-0.659771	-0.748101	-0.836669	-0.970827	-0.779549	-0.907041	-0.975949	-0.831764	-0.393018	-0.443117	-0.785957	-0.46693	-0.755815	-0.698497	-0.28125	-0.24106	-0.504272
1.05	-0.643049	0.173801	-0.148264	0.206917	0.145431	-0.472271	-0.709039	-1.09604	-1.25989	-0.917049	-1.12267	-1.20251	-0.0614517	0.264794	0.183445	-0.81252	-0.246618	-0.774565	-0.920372	0.554688	0.591752	0.237915
1.06	0.246639	0.228613	0.812869	0.255701	1.43449	0.449604	0.184711	-0.244482	-0.716139	-0.118612	-0.350791	-0.460324	1.10417	1.18354	1.37095	0.0765427	0.765882	0.0207476	-0.257872	1.65	1.62769	1.24885
1.07	0.459764	0.507108	1.57263	0.605807	1.92043	0.860542	0.187836	-1.05229	-1.00208	-0.652987	-0.911729	-0.907199	3.4198	2.73511	2.60063	-0.220332	0.654945	0.189498	-0.914122	3.42813	3.39644	3.44573
1.08	4.59523	0.188244	4.36326	0.16779	5.57668	4.68085	4.77846	5.39302	3.72292	4.45483	4.53671	4.41311	4.81824	3.57729	5.02563	4.70936	4.99557	4.28481	4.31869	4.05937	3.8105	3.70198
1.09	4.51945	0.248679	3.92908	0.290233	5.10949	4.44023	4.84721	5.84771	4.05574	4.70795	4.93827	4.68811	3.74324	2.81636	4.28657	4.78904	4.74557	4.20669	4.68588	3.10937	2.86206	2.74729
1.1	3.27773	0.207843	2.75642	0.247483	3.68137	3.21679	3.66752	4.31021	3.08542	3.4392	3.64765	3.43186	2.4323	1.86479	2.93501	3.44529	3.40963	3.0645	3.52807	2.05313	1.83863	1.77698
1.11	2.14398	0.148464	1.76951	0.174056	2.47043	2.11835	2.52846	2.80239	2.09636	2.22358	2.36483	2.2178	1.47761	1.13979	1.85376	2.20467	2.25338	2.00669	2.34682	1.26719	1.13394	1.08948
1.12	1.35148	0.0980315	1.10545	0.113697	1.63293	1.3371	1.63315	1.73989	1.36042	1.3767	1.45858	1.38655	0.888548	0.700732	1.13501	1.35623	1.45807	1.25669	1.489	0.814062	0.676127	0.658228
1.13	0.845857	0.0667132	0.683767	0.0732104	1.09856	0.835542	1.08315	1.06958	0.858861	0.845451	0.874209	0.833426	0.532298	0.427294	0.678758	0.817168	0.942445	0.781685	0.924941	0.540625	0.394877	0.389478
1.14	0.545545	0.0477089	0.431814	0.0471739	0.782931	0.535542	0.737836	0.663331	0.538548	0.531388	0.530459	0.531863	0.319798	0.283544	0.42407	0.492168	0.62682	0.469185	0.582753	0.379687	0.232377	0.24729
1.15	0.370076	0.0371298	0.287478	0.0322665	0.592306	0.365229	0.528461	0.430518	0.338548	0.342326	0.336709	0.363113	0.207298	0.196044	0.291258	0.304668	0.440882	0.29106	0.374941	0.285938	0.143315	0.167603
1.16	0.273982	0.0331327	0.196072	0.025528	0.507931	0.274604	0.406586	0.297706	0.218236	0.239201	0.222646	0.269363	0.147923	0.155419	0.194383	0.189043	0.325257	0.181685	0.239003	0.246875	0.0823774	0.10979
1.17	0.222264	0.0337877	0.152322	0.0234416	0.490744	0.212104	0.331586	0.225831	0.155736	0.186076	0.152334	0.216238	0.105736	0.146044	0.158445	0.126543	0.256507	0.123873	0.167128	0.24375	0.0480024	0.0941653
1.18	0.204139	0.0388748	0.135134	0.0271621	0.525119	0.194917	0.309711	0.203956	0.101048	0.161076	0.117959	0.194363	0.0885483	0.144482	0.150633	0.0890427	0.223695	0.0863726	0.120253	0.2875	0.0464399	0.0769778
1.19	0.208982	0.0470548	0.133181	0.0324903	0.604806	0.210542	0.317524	0.189893	0.0916733	0.153263	0.0929589	0.206863	0.0713608	0.150732	0.14282	0.0640427	0.219007	0.0723101	0.114003	0.332812	0.0401899	0.0801028
1.2	0.235232	0.058586	0.14197	0.0357891	0.736056	0.226167	0.353461	0.196143	0.0822983	0.162638	0.0913964	0.242801	0.0776108	0.183544	0.163133	0.0640427	0.222132	0.0738726	0.109316	0.367187	0.0386274	0.0972903
1.21	0.281326	0.0754887	0.156033	0.047656	0.932931	0.271479	0.412836	0.214893	0.0869858	0.195451	0.0804589	0.278738	0.0885483	0.250732	0.178758	0.0437302	0.22682	0.0691851	0.101503	0.475	0.0417524	0.111353
1.22	0.349139	0.0970412	0.184939	0.059135	1.20637	0.341792	0.445649	0.269581	0.113548	0.243888	0.0960839	0.356863	0.105736	0.311669	0.214695	0.0452927	0.290882	0.0816851	0.104628	0.571875	0.0323774	0.137915
1.23	0.443201	0.124882	0.224587	0.0761941	1.54699	0.433979	0.537836	0.333643	0.136986	0.320451	0.117959	0.474051	0.121361	0.408544	0.256883	0.0546677	0.342445	0.0894976	0.110878	0.735937	0.0495649	0.156665
1.24	0.563045	0.160718	0.27615	0.0991792	1.97043	0.546479	0.695649	0.418018	0.179173	0.426701	0.122646	0.622488	0.116673	0.531982	0.306883	0.0671677	0.40807	0.0941851	0.129628	0.953125	0.0573774	0.192603
1.25	0.719607	0.201336	0.345095	0.128219	2.46418	0.715229	0.842524	0.539893	0.236986	0.561076	0.153896	0.858426	0.115111	0.708544	0.383445	0.0765427	0.51432	0.111373	0.148378	1.22031	0.0605024	0.245728
1.26	0.91117	0.244664	0.433181	0.167451	3.00949	0.923042	1.03315	0.693018	0.324486	0.751701	0.203896	1.12718	0.133861	0.911669	0.478758	0.0937302	0.631507	0.126998	0.165566	1.58438	0.0667524	0.317603
1.27	1.13586	0.290843	0.545681	0.214768	3.59543	1.17148	1.25502	0.889893	0.435423	0.976701	0.274209	1.4553	0.149486	1.15542	0.59907	0.11873	0.80807	0.142623	0.192128	2.01875	0.0730024	0.412915
1.28	1.40648	0.336467	0.680642	0.272169	4.19699	1.4746	1.51284	1.15552	0.586986	1.27983	0.346084	1.83186	0.199486	1.48042	0.733445	0.153105	1.02682	0.162935	0.229628	2.54531	0.0761274	0.517603
1.29	1.70289	0.381093	0.834939	0.339132	4.77043	1.83554	1.83627	1.44458	0.776048	1.6142	0.436709	2.25843	0.215111	1.84136	0.883445	0.179668	1.26276	0.180123	0.256191	3.16094	0.0995649	0.656665
1.3	2.03929	0.421915	1.01131	0.407383	5.30324	2.23554	2.24096	1.78052	1.01667	2.02201	0.563271	2.75061	0.241673	2.23823	1.08032	0.217168	1.53932	0.206685	0.317128	3.79219	0.110502	0.826978
1.31	2.38133	0.458886	1.20545	0.478095	5.79231	2.66992	2.55034	2.14927	1.29324	2.46733	0.713271	3.23811	0.268236	2.67104	1.29907	0.259355	1.85651	0.236373	0.376503	4.44688	0.138627	1.0301
1.32	2.74164	0.493549	1.41326	0.54834	6.24231	3.13242	2.92846	2.51958	1.62449	2.93764	0.863271	3.7428	0.310423	3.11479	1.5397	0.31248	2.16901	0.276998	0.439003	5.10938	0.17769	1.28167
1.33	3.11179	0.521345	1.63592	0.614775	6.62043	3.59023	3.38315	2.91333	1.98855	3.41264	1.06952	4.22405	0.360423	3.55542	1.82251	0.384355	2.50182	0.32856	0.528066	5.74375	0.213627	1.56448
1.34	3.46367	0.545082	1.86189	0.671868	6.94699	4.04023	3.76284	3.30708	2.36511	3.85639	1.28983	4.6803	0.413548	3.97417	2.12876	0.473418	2.82682	0.383248	0.639003	6.30312	0.263627	1.87698
1.35	3.80523	0.562989	2.09392	0.725745	7.20949	4.45742	4.16596	3.68052	2.76824	4.2767	1.55702	5.11936	0.465111	4.35229	2.44282	0.56873	3.14088	0.44731	0.751503	6.8375	0.324565	2.23792
1.36	4.12086	0.579197	2.32869	0.772087	7.45793	4.83554	4.52377	4.01021	3.15886	4.64858	1.83358	5.51311	0.515111	4.71167	2.78345	0.678105	3.45182	0.52231	0.885878	7.30937	0.39644	2.60198
1.37	4.40383	0.590606	2.55935	0.809889	7.65168	5.16992	4.82221	4.31177	3.53855	4.98451	2.09921	5.8803	0.579173	5.00073	3.11938	0.78748	3.73776	0.625435	1.04682	7.71094	0.463627	2.98323
1.38	4.67461	0.597568	2.78787	0.843052	7.82981	5.47773	5.15346	4.59302	3.89636	5.27514	2.39921	6.18499	0.663548	5.27261	3.45688	0.914043	4.00338	0.725435	1.21088	8.07344	0.544877	3.37385
1.39	4.90679	0.602079	3.00799	0.867149	7.98606	5.73242	5.4144	4.85396	4.21824	5.52358	2.66327	6.43811	0.752611	5.48511	3.77251	1.02811	4.22994	0.850435	1.38432	8.375	0.668315	3.7551
1.4	5.11148	0.605683	3.22361	0.886212	8.13762	5.9496	5.64252	5.06489	4.50417	5.74701	2.92265	6.65374	0.833861	5.65854	4.08188	1.16404	4.44088	0.975435	1.58432	8.63594	0.782377	4.12385
1.41	5.28867	0.606297	3.42302	0.897755	8.28137	6.12773	5.84252	5.23989	4.74324	5.91576	3.16952	6.82405	0.932298	5.81011	4.35532	1.30154	4.62057	1.10669	1.79213	8.84063	0.907377	4.45979
1.42	5.44211	0.604117	3.61873	0.908871	8.42199	6.28554	6.00346	5.40239	4.9448	6.06108	3.4164	6.93343	1.03699	5.91479	4.61001	1.42029	4.77057	1.25512	2.00463	9.06563	1.05894	4.76448
1.43	5.57898	0.603142	3.79744	0.911584	8.56106	6.41679	6.15971	5.51646	5.12449	6.17983	3.62265	7.0428	1.14011	6.02573	4.84751	1.56717	4.87682	1.40669	2.214	9.22188	1.20113	5.04417
1.44	5.70586	0.601036	3.95955	0.910386	8.70168	6.51523	6.30659	5.64771	5.26511	6.28295	3.81952	7.13655	1.25417	6.12886	5.02407	1.69061	4.94713	1.56294	2.42807	9.37187	1.37613	5.27542
1.45	5.81195	0.602207	4.11287	0.914584	8.86106	6.62617	6.40971	5.75239	5.38074	6.36576	3.98046	7.18655	1.33542	6.22104	5.16938	1.79061	5.00963	1.70512	2.63744	9.57187	1.54488	5.47385
1.46	5.92023	0.600844	4.24236	0.910513	9.01887	6.70898	6.55815	5.86333	5.48699	6.44701	4.13827	7.20061	1.44636	6.33354	5.28657	1.87811	5.01588	1.85981	2.84213	9.70937	1.723	5.62385
1.47	6.02039	0.602891	4.36912	0.910943	9.18137	6.79492	6.6769	5.96489	5.56199	6.54389	4.26483	7.23499	1.53699	6.44292	5.38501	1.95936	5.00338	2.01137	3.03588	9.89531	1.90581	5.75667
1.48	6.1232	0.606246	4.47342	0.910709	9.35012	6.90273	6.78315	6.08833	5.64324	6.63608	4.36327	7.2678	1.62917	6.56792	5.4397	2.01717	4.97994	2.15044	3.22494	10.0656	2.07144	5.83792
1.49	6.23711	0.608563	4.56599	0.910613	9.51418	7.0121	6.93315	6.20708	5.71199	6.73608	4.48671	7.29436	1.73699	6.73823	5.46157	2.07654	4.92213	2.29106	3.40463	10.2469	2.24019	5.88479
1.5	6.35289	0.616931	4.64724	0.917318	9.70793	7.15898	7.07846	6.33052	5.78074	6.85795	4.58202	7.34436	1.80886	6.87886	5.45845	2.09061	4.86744	2.41137	3.56713	10.4625	2.40581	5.91448
1.51	6.47695	0.623576	4.71951	0.923091	9.89543	7.30585	7.22065	6.46333	5.8573	6.97358	4.68515	7.38968	1.90261	7.07573	5.44126	2.10311	4.79713	2.52856	3.7265	10.6625	2.573	5.92385
1.52	6.60804	0.633474	4.77927	0.933892	10.0907	7.46992	7.40815	6.61021	5.95261	7.11576	4.7539	7.4303	1.98386	7.26479	5.40063	2.09061	4.73151	2.63481	3.86869	10.8891	2.72769	5.89104
1.53	6.75429	0.646685	4.82674	0.947027	10.2986	7.66835	7.60971	6.76489	6.0448	7.28295	4.84608	7.50218	2.0448	7.48042	5.33657	2.06561	4.66432	2.73637	3.99213	11.1125	2.85894	5.84729
1.54	6.90351	0.66082	4.87029	0.961487	10.5095	7.86054	7.76909	6.93989	6.14792	7.4767	4.92421	7.57874	2.10261	7.72573	5.26938	2.04686	4.59401	2.84106	4.1015	11.3406	2.9855	5.78323
1.55	7.06601	0.677774	4.90056	0.982108	10.7173	8.08867	8.01596	7.11646	6.26511	7.66733	5.01327	7.67249	2.14011	7.96323	5.17407	1.99686	4.51901	2.92544	4.18119	11.5922	3.10425	5.71135
1.56	7.2407	0.694945	4.92986	1.00399	10.9314	8.3246	8.24877	7.29614	6.41042	7.88451	5.11952	7.77874	2.18074	8.23198	5.10688	1.96404	4.45338	3.00512	4.25307	11.8453	3.19644	5.61448
1.57	7.41945	0.712489	4.95506	1.03176	11.1548	8.5621	8.44721	7.49927	6.56511	8.11576	5.21952	7.90999	2.22449	8.49604	5.01626	1.91092	4.41119	3.08012	4.30619	12.1297	3.26988	5.51604
1.58	7.61414	0.73367	4.96775	1.05779	11.3782	8.7996	8.70971	7.71489	6.7448	8.37826	5.31796	8.05218	2.2448	8.80073	4.91938	1.86404	4.36432	3.13012	4.34525	12.3797	3.32144	5.4176
1.59	7.82367	0.753169	4.98455	1.08788	11.5923	9.04335	8.97065	7.92583	6.95574	8.64233	5.43827	8.25843	2.2823	9.12729	4.83032	1.82967	4.33151	3.17544	4.38275	12.6641	3.36206	5.30042
1.6	8.03461	0.773683	4.99959	1.12082	11.7986	9.29804	9.22065	8.15396	7.1698	8.94858	5.58827	8.4428	2.29167	9.43354	4.71626	1.79842	4.29401	3.20981	4.40775	12.9672	3.41675	5.18635
1.61	8.25398	0.795832	5.00662	1.15031	12.0173	9.5621	9.49721	8.35708	7.41355	9.26576	5.72733	8.64593	2.30417	9.74917	4.61938	1.76248	4.27369	3.24106	4.42338	13.2234	3.42613	5.08323
1.62	8.47945	0.815285	5.02088	1.18457	12.2111	9.81367	9.73159	8.59927	7.66199	9.59545	5.8914	8.87249	2.32917	10.0882	4.53657	1.72811	4.28776	3.25825	4.42494	13.5203	3.44332	4.9676
1.63	8.71226	0.836255	5.03416	1.21866	12.4032	10.0918	9.98784	8.82427	7.92605	9.94233	6.07265	9.1303	2.33855	10.4054	4.45845	1.69998	4.30494	3.27075	4.42025	13.8078	3.42613	4.88479
1.64	8.94836	0.858256	5.04275	1.2484	12.5892	10.3465	10.2613	9.04146	8.20574	10.308	6.25546	9.38186	2.34324	10.7507	4.39751	1.68592	4.32838	3.26762	4.40775	14.0563	3.40113	4.79729
1.65	9.18586	0.880513	5.05369	1.28208	12.7517	10.609	10.5488	9.27583	8.48542	10.6736	6.46327	9.63343	2.33074	11.0867	4.33188	1.66092	4.36432	3.26606	4.3765	14.3328	3.37144	4.72542
1.66	9.42476	0.900689	5.0742	1.31346	12.8923	10.8668	10.8363	9.51646	8.76824	11.0205	6.67733	9.92874	2.3323	11.4085	4.29126	1.65623	4.41276	3.25981	4.364	14.5984	3.33863	4.67229
1.67	9.65851	0.921036	5.1031	1.3443	13.0157	11.1027	11.0988	9.74771	9.06042	11.3861	6.91796	10.2053	2.31511	11.7351	4.26782	1.67498	4.47369	3.25825	4.35307	14.8703	3.3105	4.61604
1.68	9.88742	0.939189	5.12166	1.36893	13.1204	11.3324	11.33	9.96958	9.3573	11.747	7.17577	10.4959	2.30574	12.0398	4.23813	1.69061	4.54088	3.24106	4.3265	15.0813	3.28238	4.57229
1.69	10.1179	0.957448	5.14842	1.39572	13.2142	11.5621	11.6175	10.1899	9.67605	12.0923	7.43358	10.7522	2.30105	12.3398	4.22251	1.72186	4.63307	3.20825	4.31088	15.3125	3.23081	4.54729
1.7	10.3359	0.972803	5.18123	1.41774	13.2782	11.7668	11.8535	10.4196	9.97136	12.422	7.72421	11.0334	2.29167	12.5976	4.23345	1.75467	4.71119	3.20044	4.29682	15.5125	3.198	4.5426
1.71	10.5393	0.988389	5.21248	1.43701	13.3329	11.9574	12.0894	10.5993	10.2682	12.7439	7.99608	11.3131	2.27605	12.8164	4.24126	1.79529	4.80182	3.18169	4.29838	15.6875	3.15425	4.53948
1.72	10.7349	1.00091	5.25095	1.45494	13.3657	12.1324	12.3347	10.8243	10.5573	13.0251	8.2539	11.5412	2.28542	13.0289	4.27876	1.83904	4.91588	3.17075	4.29057	15.8547	3.10425	4.55354
1.73	10.9163	1.01144	5.28318	1.47143	13.3751	12.2824	12.4941	11.0352	10.826	13.3001	8.53358	11.7928	2.29167	13.232	4.3147	1.87967	5.02526	3.14262	4.26713	16.0031	3.05894	4.57385
1.74	11.0791	1.0217	5.32302	1.48191	13.3673	12.4074	12.7191	11.2196	11.0651	13.5298	8.83358	12.0053	2.27449	13.3695	4.37251	1.95467	5.14244	3.12856	4.25463	16.1125	2.998	4.62073
1.75	11.234	1.02963	5.37088	1.49057	13.3454	12.5012	12.9222	11.3977	11.2932	13.7564	9.1539	12.1912	2.27292	13.5054	4.4522	2.03748	5.24401	3.12856	4.26088	16.2156	2.94488	4.68323
1.76	11.3634	1.03578	5.41756	1.49505	13.2954	12.5855	13.0613	11.568	11.501	13.9517	9.4414	12.3616	2.26824	13.5992	4.53345	2.11717	5.35807	3.12387	4.27338	16.2813	2.898	4.7551
1.77	11.4809	1.03826	5.47185	1.49768	13.2314	12.6434	13.2081	11.7149	11.6964	14.1064	9.73515	12.5162	2.28855	13.6679	4.63657	2.20936	5.47682	3.10669	4.29213	16.3375	2.86831	4.84729
1.78	11.578	1.04236	5.52439	1.50021	13.1611	12.6668	13.3097	11.8524	11.8651	14.258	10.0133	12.66	2.28074	13.7132	4.71938	2.29686	5.58932	3.12075	4.30307	16.3891	2.81363	4.96292
1.79	11.653	1.0415	5.57947	1.49825	13.0642	12.6793	13.3878	11.9727	12.0151	14.347	10.2805	12.76	2.29792	13.7257	4.84438	2.39686	5.70651	3.12231	4.32494	16.4063	2.77144	5.06292
1.8	11.7212	1.043	5.63806	1.49248	12.9704	12.6621	13.5144	12.0852	12.1385	14.4345	10.5476	12.8256	2.29792	13.7351	4.95845	2.50623	5.82526	3.12856	4.37025	16.3938	2.72769	5.19417
1.81	11.7648	1.03826	5.69744	1.48592	12.8626	12.6293	13.5628	12.1696	12.2292	14.4939	10.8133	12.8709	2.3323	13.6835	5.07407	2.61404	5.95182	3.14575	4.40932	16.3766	2.69956	5.30823
1.82	11.7904	1.032	5.75349	1.47315	12.7454	12.5715	13.5581	12.2399	12.3057	14.5173	11.0648	12.8866	2.36824	13.646	5.19595	2.72186	6.07213	3.16137	4.46088	16.3016	2.66363	5.45042
1.83	11.7974	1.02614	5.81111	1.46515	12.6032	12.4949	13.5816	12.3196	12.3417	14.5236	11.2836	12.8678	2.39324	13.5648	5.31782	2.83123	6.18151	3.18481	4.49682	16.2687	2.6355	5.57229
1.84	11.7851	1.01887	5.87263	1.44872	12.4564	12.3824	13.5675	12.3383	12.3589	14.5017	11.4867	12.8444	2.42136	13.4929	5.43813	2.95467	6.30963	3.21606	4.55619	16.1719	2.62613	5.70823
1.85	11.7601	1.00954	5.93299	1.43184	12.3111	12.2684	13.555	12.368	12.3589	14.4517	11.693	12.7631	2.4573	13.3742	5.57876	3.07186	6.41901	3.25044	4.62025	16.0641	2.60113	5.85823
1.86	11.7187	0.999598	6.00603	1.4185	12.1564	12.1496	13.4941	12.3727	12.3214	14.3923	11.8726	12.6803	2.49167	13.2554	5.71626	3.19529	6.53151	3.29106	4.69525	15.9984	2.60269	6.0176
1.87	11.6584	0.987481	6.07146	1.39848	12.0032	12.0105	13.4003	12.3696	12.2635	14.308	12.0008	12.5819	2.53386	13.1117	5.86157	3.31248	6.64401	3.35356	4.77338	15.8688	2.59019	6.1676
1.88	11.594	0.974501	6.13572	1.3782	11.8548	11.8496	13.3238	12.3493	12.1885	14.2001	12.157	12.4569	2.58542	12.9742	5.99126	3.43592	6.75182	3.40981	4.84369	15.7375	2.59331	6.32229
1.89	11.5112	0.962118	6.19802	1.36047	11.6939	11.698	13.2316	12.3196	12.0917	14.0845	12.2539	12.3162	2.6198	12.8023	6.1147	3.53904	6.85338	3.46762	4.92494	15.6219	2.59331	6.46917
1.9	11.423	0.947944	6.26131	1.33845	11.5361	11.523	13.1285	12.2665	11.9854	13.9455	12.3633	12.1834	2.6698	12.6289	6.25845	3.66092	6.94244	3.51919	5.01088	15.4688	2.59644	6.63323
1.91	11.3232	0.932434	6.32615	1.31948	11.3814	11.3371	12.9972	12.1961	11.8557	13.8158	12.4383	12.0256	2.72917	12.4554	6.38657	3.78904	7.02213	3.58325	5.10932	15.3469	2.59488	6.77698
1.92	11.2126	0.915498	6.39275	1.29724	11.2126	11.1621	12.8519	12.1368	11.7323	13.6548	12.4695	11.8506	2.79011	12.2648	6.51313	3.91248	7.09713	3.65044	5.22025	15.1969	2.60738	6.94417
1.93	11.1012	0.900388	6.45447	1.27184	11.0595	10.9762	12.7206	12.0524	11.5885	13.5048	12.5055	11.6584	2.84167	12.1039	6.64126	4.04373	7.16744	3.72387	5.33744	15.0219	2.623	7.07698
1.94	10.9809	0.883705	6.52283	1.25162	10.9111	10.8074	12.5613	11.9696	11.4214	13.3361	12.5211	11.4725	2.89636	11.9117	6.76157	4.15779	7.23776	3.81137	5.43588	14.8938	2.65113	7.23323
1.95	10.8582	0.868335	6.58318	1.22436	10.7673	10.6199	12.4222	11.8665	11.2635	13.1798	12.5101	11.2756	2.94324	11.7335	6.89751	4.28123	7.27682	3.88794	5.56713	14.7	2.67769	7.37698
1.96	10.734	0.850815	6.64275	1.2014	10.6251	10.4371	12.2535	11.7586	11.0964	13.0158	12.4898	11.1053	3.0073	11.5507	7.00376	4.39686	7.32057	3.97544	5.6765	14.5406	2.70113	7.52698
1.97	10.5993	0.83132	6.70232	1.17839	10.4829	10.2637	12.0425	11.6493	10.9198	12.8533	12.4414	10.9037	3.07917	11.357	7.11626	4.52186	7.35651	4.05825	5.78275	14.3828	2.73238	7.6676
1.98	10.4729	0.813838	6.75701	1.15039	10.3532	10.0809	11.9113	11.5243	10.7354	12.6798	12.3961	10.71	3.14636	11.1914	7.22876	4.63748	7.38463	4.14731	5.89213	14.1781	2.77613	7.81135
1.99	10.3363	0.796441	6.82283	1.13207	10.2251	9.88242	11.7285	11.3977	10.5339	12.5126	12.3289	10.5256	3.20261	11.0257	7.31626	4.75779	7.40963	4.22856	6.02025	14.0797	2.8355	7.93479
2	10.198	0.778434	6.86853	1.10601	10.1079	9.70273	11.5519	11.2665	10.3526	12.3361	12.2398	10.3256	3.2573	10.8398	7.42095	4.85623	7.41276	4.29887	6.14213	13.8719	2.86831	8.07698
2.01	10.0668	0.75966	6.91404	1.08279	10.0032	9.51835	11.3941	11.1196	10.1589	12.1501	12.1555	10.1428	3.32761	10.6976	7.50063	4.96248	7.41432	4.377	6.25463	13.7016	2.90738	8.19417
2.02	9.92976	0.740241	6.96463	1.06287	9.89543	9.35273	11.2019	10.9727	9.97136	12.0017	12.0289	9.95999	3.3948	10.5179	7.57251	5.04686	7.42369	4.46137	6.364	13.5625	2.9605	8.32542
2.03	9.80211	0.721402	7.00486	1.03916	9.80168	9.18398	11.0222	10.8461	9.78074	11.8392	11.9133	9.8053	3.46511	10.3632	7.63657	5.13123	7.41432	4.54731	6.46869	13.3891	3.01675	8.43479
2.04	9.67476	0.705326	7.05193	1.01787	9.70637	9.01992	10.8535	10.7196	9.59324	11.6861	11.7914	9.64124	3.51042	10.2257	7.67876	5.22654	7.40651	4.63794	6.58119	13.2594	3.09175	8.53323
2.05	9.54664	0.687298	7.0867	0.9966	9.60168	8.87148	10.7144	10.5665	9.40105	11.5236	11.6601	9.47249	3.57292	10.082	7.74595	5.28123	7.39244	4.72387	6.68744	13.0937	3.14019	8.62854
2.06	9.42023	0.668833	7.12693	0.976586	9.51887	8.71523	10.5128	10.4227	9.21667	11.372	11.5242	9.33655	3.63542	9.94761	7.81001	5.34842	7.36901	4.81919	6.80463	12.95	3.19331	8.72073
2.07	9.30086	0.650956	7.16248	0.954182	9.44231	8.57773	10.3613	10.2868	9.02449	11.2283	11.3758	9.1928	3.70105	9.81792	7.85063	5.42029	7.32994	4.92387	6.91244	12.8	3.26363	8.79885
2.08	9.18305	0.632897	7.19295	0.934522	9.35168	8.43085	10.2081	10.1211	8.85886	11.0892	11.232	9.06155	3.7698	9.70698	7.88345	5.47186	7.30338	4.99887	7.02338	12.6594	3.33238	8.87073
2.09	9.0768	0.616594	7.22478	0.914255	9.29074	8.30117	10.0503	9.99927	8.70574	10.983	11.0695	8.93968	3.82917	9.59917	7.90845	5.52811	7.27057	5.09419	7.13119	12.5297	3.40894	8.92698
2.1	8.97086	0.601575	7.24998	0.896085	9.22981	8.16054	9.91596	9.83833	8.5448	10.8642	10.943	8.81311	3.88699	9.51167	7.93345	5.55779	7.22994	5.17543	7.22807	12.4078	3.48706	8.9801
2.11	8.86164	0.585587	7.27049	0.876712	9.17356	8.02617	9.74409	9.70864	8.38699	10.7564	10.7914	8.68655	3.94792	9.39448	7.9522	5.58436	7.19401	5.26919	7.33588	12.2688	3.548	9.01135
2.12	8.76195	0.5727	7.2908	0.860401	9.11262	7.89492	9.59877	9.58208	8.24324	10.6642	10.6523	8.57249	3.99167	9.30698	7.96782	5.60467	7.13776	5.35512	7.42494	12.1719	3.62769	9.03635
2.13	8.67039	0.558348	7.30095	0.843666	9.06574	7.77773	9.47846	9.43208	8.12292	10.5626	10.507	8.4678	4.04792	9.24136	7.97095	5.60936	7.07682	5.43637	7.51088	12.0547	3.69488	9.05354
2.14	8.59398	0.545985	7.31463	0.825582	9.02043	7.6746	9.34409	9.31802	7.99167	10.4908	10.3758	8.4178	4.10417	9.20229	7.95063	5.63279	7.01432	5.53169	7.59994	11.9437	3.77456	9.06917
2.15	8.50429	0.534405	7.32556	0.811562	8.98137	7.56992	9.21752	9.19146	7.85417	10.4173	10.2258	8.32249	4.14324	9.11948	7.9272	5.62811	6.96744	5.60356	7.68588	11.8609	3.85425	9.07698
2.16	8.42539	0.52297	7.33299	0.794529	8.95012	7.4746	9.11127	9.05239	7.74324	10.3548	10.0914	8.2303	4.19324	9.05229	7.91001	5.64373	6.90807	5.6895	7.77338	11.7469	3.92144	9.07073
2.17	8.35351	0.512107	7.33885	0.779429	8.91574	7.38554	8.97377	8.95708	7.63699	10.3001	9.94921	8.17405	4.24011	9.00229	7.87876	5.64373	6.84244	5.75981	7.84525	11.6609	4.01363	9.06604
2.18	8.27898	0.500821	7.33474	0.765339	8.87668	7.29804	8.8394	8.83677	7.54636	10.2501	9.80077	8.08968	4.29167	8.96011	7.84126	5.61873	6.76901	5.82387	7.91713	11.5687	4.09488	9.04417
2.19	8.22148	0.492637	7.33435	0.75405	8.83762	7.21992	8.7519	8.73989	7.46667	10.2126	9.68202	8.05374	4.32917	8.92104	7.80688	5.60623	6.70807	5.87856	7.989	11.5094	4.16988	9.00667
2.2	8.16195	0.483732	7.33299	0.739815	8.80949	7.15585	8.63627	8.65083	7.38074	10.172	9.55233	8.01155	4.3698	8.88042	7.76938	5.59217	6.64869	5.94887	8.05932	11.4266	4.25425	8.96448
2.21	8.10211	0.476824	7.32068	0.728997	8.78449	7.09648	8.50971	8.54614	7.29792	10.1345	9.43202	7.96624	4.39324	8.86011	7.7147	5.57811	6.57682	5.99262	8.11557	11.3609	4.31675	8.90979
2.22	8.05414	0.468627	7.31365	0.719867	8.75949	7.05117	8.43627	8.47427	7.2323	10.1095	9.31015	7.9303	4.43699	8.80073	7.65688	5.55623	6.51276	6.04731	8.17807	11.3094	4.38238	8.86604
2.23	8.00211	0.460603	7.29881	0.710486	8.72981	6.9996	8.34096	8.36958	7.16667	10.0767	9.18827	7.89436	4.47917	8.77573	7.59751	5.52342	6.43307	6.09731	8.22963	11.2516	4.45113	8.80667
2.24	7.95914	0.45713	7.28123	0.702893	8.70637	6.95585	8.25346	8.28521	7.11199	10.0689	9.09921	7.86155	4.49167	8.75698	7.53188	5.49217	6.35807	6.1395	8.28588	11.2031	4.50581	8.73323
2.25	7.91508	0.45211	7.26463	0.694458	8.67043	6.91679	8.13471	8.21489	7.04949	10.0658	8.98671	7.83811	4.52292	8.75073	7.45688	5.45779	6.29401	6.17544	8.33588	11.1578	4.58238	8.65667
2.26	7.87586	0.447561	7.2408	0.685915	8.64543	6.87617	8.0894	8.14146	6.98074	10.0658	8.87265	7.80843	4.5573	8.72104	7.39438	5.40623	6.22213	6.20981	8.38432	11.0813	4.64175	8.58635
2.27	7.84351	0.444479	7.22224	0.682204	8.62043	6.84179	8.03002	8.07427	6.94011	10.058	8.78202	7.80686	4.57136	8.71011	7.32251	5.36873	6.14244	6.24262	8.42807	11.0719	4.70738	8.49417
2.28	7.80351	0.442399	7.19412	0.675746	8.60012	6.8121	7.9394	8.00396	6.88699	10.0736	8.6664	7.76936	4.58542	8.69761	7.24126	5.32342	6.07369	6.2645	8.45307	11.0266	4.76988	8.40042
2.29	7.77398	0.440575	7.16599	0.668232	8.57043	6.78242	7.91909	7.94771	6.84324	10.0673	8.57577	7.74905	4.59167	8.69292	7.15845	5.27654	6.00651	6.29887	8.47807	10.9609	4.82925	8.31917
2.3	7.74523	0.439	7.14021	0.665082	8.53918	6.76367	7.83315	7.89927	6.81042	10.0783	8.49296	7.72874	4.60574	8.70073	7.07563	5.24217	5.92682	6.31762	8.50307	10.9375	4.8855	8.23323
2.31	7.71586	0.437321	7.10545	0.661102	8.51106	6.73085	7.78315	7.84771	6.77136	10.0751	8.41796	7.72405	4.61511	8.68198	6.98813	5.19373	5.84869	6.33325	8.52807	10.8922	4.93238	8.12698
2.32	7.69039	0.436062	7.074	0.658809	8.47824	6.70898	7.72846	7.78989	6.74792	10.0845	8.36015	7.71624	4.62449	8.66479	6.90376	5.14998	5.77213	6.3395	8.54994	10.8609	4.98238	8.03323
2.33	7.66039	0.434896	7.03572	0.657012	8.43606	6.69335	7.6769	7.74771	6.7198	10.0908	8.27577	7.67561	4.62761	8.66011	6.81157	5.09217	5.70338	6.33637	8.54213	10.8422	5.03706	7.92073
2.34	7.63711	0.434379	6.99588	0.655097	8.39543	6.66835	7.63002	7.69927	6.7073	10.0908	8.22108	7.67405	4.62449	8.66011	6.71001	5.03592	5.62994	6.33012	8.54525	10.8016	5.08394	7.8301
2.35	7.61476	0.434491	6.95877	0.653094	8.36106	6.66992	7.57534	7.65396	6.67917	10.1158	8.15546	7.66311	4.62605	8.64761	6.62407	4.98279	5.55651	6.33794	8.54682	10.7703	5.13863	7.71292
2.36	7.58398	0.434296	6.91365	0.652981	8.31106	6.64492	7.53471	7.60708	6.64167	10.108	8.09608	7.64436	4.61511	8.63667	6.5272	4.90311	5.48307	6.32856	8.53432	10.7359	5.1855	7.61135
2.37	7.56008	0.434596	6.87088	0.650773	8.27043	6.63085	7.48784	7.58208	6.62292	10.108	8.05077	7.6303	4.59792	8.61948	6.44126	4.84998	5.41588	6.32856	8.51557	10.6922	5.22144	7.50198
2.38	7.53633	0.434697	6.8283	0.65355	8.22199	6.61523	7.44721	7.54771	6.60886	10.1064	8.00546	7.61311	4.58386	8.61323	6.33032	4.79373	5.35182	6.302	8.50775	10.6859	5.25738	7.39729
2.39	7.51023	0.436137	6.78416	0.653814	8.18606	6.59492	7.4269	7.50552	6.58074	10.108	7.95077	7.59905	4.55574	8.59448	6.23501	4.72967	5.29401	6.27856	8.49994	10.6469	5.29019	7.29885
2.4	7.49039	0.436516	6.73513	0.652386	8.12981	6.58398	7.39565	7.48052	6.5698	10.1158	7.90077	7.59436	4.54324	8.58979	6.14126	4.67811	5.22682	6.252	8.47807	10.5953	5.31988	7.18948
2.41	7.4643	0.435562	6.68826	0.657331	8.06887	6.5746	7.39877	7.43833	6.53699	10.1064	7.84921	7.56624	4.53386	8.56948	6.04907	4.61248	5.15651	6.22075	8.44369	10.6016	5.33863	7.08323
2.42	7.43258	0.434541	6.63474	0.653538	8.00793	6.54648	7.32221	7.41802	6.53386	10.0861	7.80077	7.55374	4.51355	8.54292	5.96782	4.55311	5.08932	6.19731	8.39213	10.525	5.35894	6.99417
2.43	7.40742	0.435718	6.59041	0.655877	7.94699	6.51835	7.2894	7.38052	6.51042	10.0767	7.77577	7.55374	4.48699	8.53511	5.86626	4.49061	5.04869	6.17387	8.364	10.5109	5.38707	6.88167
2.44	7.38086	0.435375	6.53728	0.657684	7.88293	6.51054	7.29565	7.35864	6.48855	10.0626	7.73515	7.51468	4.4573	8.50229	5.77407	4.43123	4.97994	6.14106	8.31713	10.4828	5.39956	6.77229
2.45	7.35492	0.435561	6.47713	0.655311	7.82043	6.50742	7.2394	7.33521	6.46667	10.0423	7.71015	7.50218	4.42917	8.49604	5.68032	4.37029	4.91276	6.10669	8.27963	10.4	5.40269	6.66448
2.46	7.32648	0.433934	6.42498	0.659021	7.74387	6.48554	7.24409	7.30552	6.45574	10.0111	7.6789	7.47405	4.40417	8.46167	5.59595	4.30311	4.84869	6.07387	8.23119	10.3859	5.40894	6.55198
2.47	7.29398	0.43289	6.3697	0.65986	7.66731	6.46835	7.21596	7.27896	6.43699	9.98139	7.65233	7.44436	4.37292	8.42104	5.50845	4.25311	4.77682	6.0395	8.17494	10.3453	5.40581	6.45354
2.48	7.26289	0.432739	6.30955	0.659861	7.59074	6.44492	7.19252	7.26958	6.40574	9.95795	7.62108	7.41311	4.34324	8.38979	5.4147	4.19061	4.72682	5.9895	8.11713	10.2938	5.39956	6.34417
2.49	7.23226	0.43304	6.2492	0.661257	7.51887	6.41523	7.19096	7.24458	6.39167	9.93295	7.60546	7.37874	4.29949	8.34448	5.33188	4.11561	4.67994	5.94262	8.04525	10.2563	5.38081	6.24104
2.5	7.19273	0.432988	6.19217	0.662305	7.44387	6.3871	7.12846	7.22114	6.37292	9.89233	7.58046	7.3553	4.24792	8.29761	5.25376	4.06561	4.61744	5.89887	7.989	10.2156	5.36363	6.13323
2.51	7.16195	0.43227	6.13299	0.660642	7.36731	6.36367	7.1144	7.22583	6.34324	9.84858	7.55702	7.32405	4.21042	8.26479	5.17407	4.00623	4.56901	5.84887	7.939	10.1438	5.35425	6.02854
2.52	7.12258	0.430616	6.07615	0.660637	7.28449	6.34023	7.11284	7.20239	6.3198	9.80014	7.51796	7.27249	4.16824	8.20698	5.09282	3.95154	4.51901	5.80668	7.87338	10.0953	5.33238	5.93792
2.53	7.08273	0.43034	6.01697	0.662947	7.20324	6.2996	7.05815	7.17896	6.30105	9.75326	7.49921	7.2428	4.12292	8.16792	5.00376	3.88904	4.47994	5.752	7.79525	10.0734	5.31831	5.82385
2.54	7.05023	0.429904	5.94959	0.661129	7.12981	6.26835	7.07065	7.16958	6.26355	9.69545	7.49452	7.22561	4.07136	8.11323	4.9272	3.82498	4.42994	5.69106	7.72494	9.99687	5.27144	5.7301
2.55	7.00633	0.427	5.88689	0.65997	7.03918	6.24648	7.03784	7.15708	6.23699	9.62358	7.46796	7.17874	4.02917	8.04604	4.84751	3.77967	4.38307	5.63012	7.65619	9.93594	5.21988	5.6426
2.56	6.96461	0.425666	5.82752	0.659241	6.94543	6.21523	7.03471	7.12427	6.2073	9.56733	7.4414	7.13811	3.98542	7.98667	4.78032	3.72967	4.33932	5.57231	7.58588	9.88437	5.19175	5.53635
2.57	6.91773	0.421991	5.76033	0.657867	6.85793	6.16523	7.02065	7.10708	6.1823	9.47826	7.41483	7.08655	3.94792	7.91636	4.69907	3.65936	4.28463	5.50825	7.514	9.80781	5.15269	5.45667
2.58	6.87648	0.420442	5.6992	0.65714	6.77356	6.11835	6.99409	7.09302	6.1573	9.41108	7.39921	7.03499	3.91042	7.87261	4.61938	3.60467	4.24713	5.45825	7.42963	9.75781	5.11988	5.35667
2.59	6.82804	0.418727	5.63181	0.656672	6.68606	6.0746	6.98159	7.07427	6.11511	9.32826	7.38358	6.9803	3.8573	7.79917	4.56157	3.51873	4.20494	5.3895	7.3515	9.69219	5.06675	5.26917
2.6	6.78414	0.417647	5.56463	0.651709	6.59699	6.03398	6.95346	7.07739	6.07605	9.25326	7.36796	6.94749	3.80574	7.72886	4.5022	3.46404	4.16119	5.31919	7.26088	9.60156	5.01831	5.18948
2.61	6.73133	0.416203	5.49881	0.648806	6.51262	5.98242	6.92846	7.05708	6.0323	9.17514	7.33202	6.88811	3.75261	7.65229	4.44282	3.40467	4.11276	5.27231	7.17494	9.525	4.96363	5.09417
2.62	6.68039	0.41328	5.43513	0.645718	6.42043	5.93554	6.91596	7.03208	5.99636	9.07201	7.30546	6.83811	3.70417	7.58354	4.37407	3.35311	4.07057	5.20044	7.08744	9.45312	4.92613	5.01604
2.63	6.62929	0.411021	5.36873	0.644581	6.31887	5.88867	6.89877	7.01177	5.95261	8.97983	7.28046	6.79593	3.65886	7.50698	4.31157	3.26561	4.03463	5.14731	7.02025	9.375	4.86675	4.92854
2.64	6.57648	0.408623	5.30193	0.642326	6.21731	5.8371	6.87221	7.01177	5.92761	8.87983	7.26171	6.72405	3.60886	7.42417	4.2397	3.20467	3.99401	5.08169	6.93744	9.30156	4.81519	4.84104
2.65	6.51476	0.405871	5.23787	0.636619	6.12512	5.77617	6.80502	6.98989	5.8948	8.77826	7.25077	6.64905	3.5573	7.32104	4.19282	3.14529	3.95651	5.0145	6.86088	9.2	4.75738	4.77542
2.66	6.46851	0.404172	5.17654	0.636276	6.02668	5.71679	6.84096	6.96958	5.85105	8.68139	7.24296	6.59593	3.5198	7.23979	4.13032	3.08592	3.91901	4.96919	6.77025	9.15313	4.70113	4.68323
2.67	6.40945	0.402148	5.11424	0.628692	5.93762	5.67148	6.78627	6.95864	5.7948	8.58451	7.21483	6.52718	3.4698	7.14917	4.08032	3.03436	3.88463	4.91137	6.69838	9.03594	4.64956	4.61917
2.68	6.35101	0.399654	5.04861	0.624166	5.83918	5.61992	6.7394	6.93521	5.76511	8.46733	7.19452	6.46468	3.41511	7.06948	4.00688	2.97186	3.85494	4.84419	6.60775	8.94687	4.59331	4.56292
2.69	6.29758	0.399039	4.98982	0.622833	5.73137	5.56367	6.74252	6.91958	5.72917	8.37514	7.17577	6.38968	3.36667	6.98198	3.95376	2.92967	3.82994	4.777	6.51713	8.90312	4.53394	4.47385
2.7	6.23414	0.396749	4.92166	0.614776	5.62668	5.51054	6.70815	6.88833	5.68855	8.2642	7.14452	6.31311	3.31511	6.88198	3.90845	2.86561	3.79401	4.7145	6.42963	8.77969	4.46363	4.4176
2.71	6.18039	0.393419	4.86443	0.612905	5.55481	5.44335	6.68315	6.86489	5.64949	8.13608	7.12421	6.2553	3.27917	6.81323	3.85845	2.81404	3.76432	4.64575	6.36713	8.71562	4.39331	4.35667
2.72	6.11992	0.391255	4.80252	0.606272	5.47043	5.39335	6.64409	6.85864	5.6073	8.02983	7.08983	6.16624	3.2323	6.70698	3.8272	2.77029	3.72369	4.59419	6.28119	8.61719	4.32144	4.28479
2.73	6.06711	0.389936	4.73865	0.601057	5.39074	5.34023	6.63784	6.82114	5.56511	7.93139	7.06483	6.09436	3.19011	6.63511	3.75845	2.71248	3.69401	4.53481	6.18588	8.52656	4.26831	4.22854
2.74	6.00539	0.389045	4.67771	0.596388	5.30637	5.28398	6.58315	6.79927	5.50886	7.82514	7.04921	6.02093	3.13699	6.53979	3.72251	2.65779	3.66588	4.46606	6.11244	8.43906	4.19331	4.16448
2.75	5.95039	0.387792	4.61638	0.587979	5.22668	5.22929	6.57846	6.77739	5.4698	7.70483	7.03202	5.95061	3.08855	6.44604	3.66938	2.61404	3.63932	4.40669	6.03275	8.32187	4.1355	4.11135
2.76	5.88289	0.387354	4.56131	0.583981	5.13606	5.14335	6.51596	6.74771	5.43386	7.60639	6.98983	5.87561	3.03074	6.34917	3.64126	2.56873	3.61119	4.36294	5.95463	8.25	4.05425	4.04729
2.77	5.82133	0.385473	4.49236	0.572449	5.04231	5.07773	6.49096	6.71646	5.39792	7.49545	6.95077	5.77874	2.9948	6.26792	3.58501	2.52186	3.57682	4.30825	5.87025	8.09687	3.99019	3.98948
2.78	5.75867	0.385224	4.44295	0.569204	4.95324	5.01523	6.46909	6.68833	5.36199	7.3767	6.91015	5.70218	2.9323	6.17729	3.53501	2.48123	3.56901	4.2645	5.79369	8.0375	3.92613	3.93635
2.79	5.70523	0.383673	4.38572	0.564043	4.87356	4.95273	6.42846	6.66646	5.32605	7.27358	6.88827	5.63343	2.90417	6.10542	3.48032	2.44373	3.53463	4.21294	5.72494	7.94844	3.873	3.8676
2.8	5.64304	0.38241	4.32439	0.554515	4.80481	4.89179	6.39877	6.62271	5.26824	7.17201	6.86952	5.54124	2.86667	5.99448	3.44438	2.40936	3.49244	4.14731	5.64838	7.82344	3.82144	3.80823
2.81	5.57695	0.379354	4.26756	0.548769	4.71731	4.82617	6.35659	6.58052	5.22136	7.05795	6.82733	5.44749	2.84324	5.89136	3.39126	2.36873	3.47369	4.0895	5.56713	7.73594	3.75425	3.75979
2.82	5.51898	0.377717	4.21619	0.540352	4.63449	4.7746	6.32221	6.53833	5.17917	6.94858	6.80077	5.37093	2.81042	5.81011	3.37407	2.33748	3.44869	4.04106	5.49525	7.63125	3.69331	3.70823
2.83	5.45804	0.377149	4.16189	0.533763	4.54231	4.71679	6.28315	6.51489	5.15105	6.83764	6.75546	5.3053	2.76199	5.71167	3.32563	2.29998	3.41744	3.98794	5.41713	7.5375	3.64644	3.66292
2.84	5.39617	0.377305	4.10896	0.527497	4.45168	4.66523	6.23784	6.47583	5.10105	6.73139	6.7289	5.22718	2.71199	5.63042	3.28345	2.26873	3.40338	3.93168	5.34994	7.44687	3.58707	3.60042
2.85	5.33211	0.375738	4.05506	0.520189	4.37199	4.60429	6.20502	6.43052	5.04792	6.62358	6.68983	5.12874	2.6823	5.53667	3.24438	2.23123	3.37838	3.87856	5.28119	7.34375	3.523	3.55979
2.86	5.2707	0.374814	4.00232	0.514791	4.29856	4.53554	6.16284	6.39927	4.99636	6.50795	6.67265	5.04905	2.65417	5.43042	3.21626	2.19998	3.36588	3.81606	5.19213	7.27188	3.45581	3.50042
2.87	5.20429	0.374272	3.9531	0.506195	4.22981	4.46054	6.11284	6.34771	4.94949	6.4017	6.63983	4.97249	2.6073	5.32104	3.18813	2.17498	3.34557	3.77231	5.13588	7.16094	3.39488	3.45198
2.88	5.14633	0.374392	3.90154	0.501335	4.15324	4.39335	6.10034	6.31489	4.89949	6.29545	6.59765	4.88811	2.57292	5.24761	3.14595	2.13904	3.31119	3.72544	5.0765	7.07656	3.34331	3.39417
2.89	5.07992	0.372276	3.85486	0.494896	4.07668	4.33554	6.04252	6.26802	4.85886	6.19233	6.53827	4.8053	2.53699	5.14448	3.10845	2.11092	3.29713	3.66919	5.00775	6.99219	3.29175	3.36135
2.9	5.01586	0.370169	3.80174	0.483044	4.00949	4.26367	5.97846	6.21177	4.81511	6.0892	6.50077	4.72874	2.50886	5.05229	3.07876	2.09217	3.27213	3.61762	4.94682	6.85313	3.25113	3.30198
2.91	4.95898	0.37159	3.75779	0.481428	3.95168	4.19492	5.98784	6.17427	4.76667	5.96576	6.47265	4.66155	2.46042	4.95386	3.05688	2.05779	3.24557	3.56294	4.87963	6.81094	3.18081	3.2676
2.92	4.89648	0.369527	3.70681	0.471076	3.88762	4.12148	5.89409	6.13208	4.72605	5.87983	6.42733	4.57718	2.4323	4.88667	3.01938	2.03904	3.23307	3.5145	4.81557	6.6875	3.12769	3.2176
2.93	4.8382	0.369034	3.66092	0.463775	3.83449	4.06835	5.8769	6.07583	4.66667	5.79545	6.3789	4.48655	2.39636	4.80229	2.9897	2.01092	3.20026	3.45981	4.75307	6.59375	3.09488	3.18479
2.94	4.77461	0.36829	3.61404	0.457204	3.75949	4.02148	5.81909	6.02739	4.61042	5.6892	6.34296	4.40843	2.3573	4.71011	2.95376	1.98279	3.18619	3.42231	4.68275	6.50625	3.04019	3.13792
2.95	4.71383	0.36572	3.56912	0.44878	3.69231	3.94804	5.73784	5.97427	4.5573	5.59858	6.30702	4.34593	2.34324	4.63354	2.92251	1.97342	3.17057	3.37231	4.63275	6.40312	2.99175	3.08635
2.96	4.65617	0.364636	3.52635	0.443083	3.61887	3.88867	5.7269	5.92427	4.50574	5.48764	6.26171	4.2678	2.32761	4.55229	2.89907	1.94061	3.14713	3.33325	4.5765	6.32031	2.93706	3.05667
2.97	4.59258	0.36284	3.48318	0.434706	3.54231	3.83085	5.64096	5.86958	4.45886	5.40795	6.21796	4.19436	2.30105	4.46167	2.8772	1.92342	3.12057	3.29106	4.52182	6.21875	2.88706	3.02542
2.98	4.53273	0.363137	3.44197	0.42803	3.48137	3.76835	5.64409	5.80552	4.40886	5.30951	6.16015	4.11936	2.2573	4.37261	2.84907	1.89686	3.09557	3.25512	4.45619	6.13594	2.85581	2.99104
2.99	4.47414	0.361653	3.40486	0.424304	3.43137	3.71992	5.58627	5.74302	4.36667	5.22201	6.11171	4.04749	2.21355	4.29917	2.82876	1.87186	3.07682	3.2145	4.39994	6.07969	2.81519	2.95198
3	4.4132	0.356858	3.35506	0.414314	3.36731	3.6496	5.4894	5.69458	4.30886	5.13451	6.0539	3.98655	2.21824	4.22886	2.7897	1.84529	3.06432	3.17075	4.34838	5.95	2.76363	2.90823
3.01	4.35336	0.357781	3.31697	0.408435	3.30949	3.59023	5.48471	5.63208	4.25417	5.03295	6.00702	3.91468	2.1698	4.13823	2.76626	1.81561	3.04557	3.11919	4.29838	5.87031	2.7355	2.88479
3.02	4.28976	0.355874	3.27986	0.404586	3.25012	3.53554	5.38627	5.57739	4.20261	4.94701	5.96952	3.84124	2.13699	4.05073	2.74438	1.79373	3.01588	3.08637	4.24369	5.8125	2.68706	2.8551
3.03	4.2382	0.354692	3.23357	0.395864	3.20168	3.47617	5.36596	5.52739	4.14949	4.86264	5.91952	3.77561	2.1198	3.98354	2.70688	1.77342	3.00494	3.04419	4.18744	5.70156	2.63863	2.81135
3.04	4.18258	0.353691	3.19822	0.388203	3.13293	3.42617	5.30815	5.46958	4.10574	4.78295	5.88046	3.73186	2.09011	3.89761	2.67563	1.75623	2.98151	3.00669	4.13432	5.61406	2.61363	2.80354
3.05	4.12586	0.351746	3.15955	0.381593	3.07668	3.3621	5.2519	5.41333	4.05574	4.70795	5.82421	3.65843	2.06824	3.83979	2.65532	1.73592	2.95807	2.97544	4.08744	5.52656	2.56988	2.7676
3.06	4.06679	0.35059	3.12439	0.374936	3.01887	3.30273	5.21752	5.35239	4.0073	4.61264	5.76952	3.58968	2.04011	3.75698	2.6147	1.72498	2.94713	2.93481	4.039	5.44688	2.54331	2.74417
3.07	4.00758	0.347496	3.0908	0.369075	2.96887	3.25742	5.14877	5.28208	3.96511	4.53764	5.70702	3.5178	2.01042	3.68042	2.59907	1.70154	2.91744	2.90512	4.0015	5.36719	2.5105	2.72385
3.08	3.95179	0.345994	3.05447	0.362813	2.90793	3.1996	5.09096	5.22583	3.91824	4.46264	5.65858	3.45061	1.98855	3.61479	2.56782	1.68279	2.90026	2.86762	3.97025	5.27812	2.47613	2.6926
3.09	3.89742	0.34503	3.0201	0.35558	2.85793	3.14804	5.04096	5.17583	3.87136	4.38608	5.60858	3.38499	1.9573	3.54292	2.54751	1.66404	2.88151	2.84262	3.93744	5.18281	2.44331	2.66135
3.1	3.84336	0.343242	2.98299	0.349414	2.80481	3.09648	4.98159	5.11489	3.82605	4.30483	5.5664	3.33186	1.9323	3.47417	2.51626	1.65623	2.85651	2.802	3.90463	5.09844	2.40269	2.62698
3.11	3.79258	0.340831	2.94705	0.343928	2.74856	3.04335	4.93784	5.06802	3.77292	4.23295	5.50546	3.27718	1.92449	3.41479	2.49438	1.63592	2.83151	2.76919	3.86713	5.02031	2.38081	2.57698
3.12	3.72961	0.33663	2.9158	0.337094	2.70324	2.99179	4.84877	4.99927	3.73386	4.13295	5.43983	3.21468	1.89636	3.33511	2.47876	1.62498	2.80494	2.7395	3.83744	4.93437	2.35113	2.5551
3.13	3.67898	0.3343	2.88572	0.333335	2.65637	2.94492	4.83627	4.93052	3.67136	4.06889	5.36952	3.1553	1.87917	3.27729	2.46313	1.61717	2.76901	2.71294	3.80463	4.88125	2.323	2.51448
3.14	3.62117	0.330808	2.8533	0.327578	2.60012	2.89804	4.72846	4.85864	3.63074	3.9892	5.33827	3.0928	1.86355	3.21167	2.43813	1.59998	2.74557	2.68012	3.76244	4.80781	2.298	2.49417
3.15	3.57164	0.327677	2.81697	0.320732	2.55324	2.85117	4.66127	4.80239	3.5948	3.9267	5.2789	3.05218	1.84167	3.15386	2.41626	1.57967	2.71901	2.65356	3.739	4.70625	2.25738	2.46448
3.16	3.5207	0.326758	2.78943	0.315458	2.51574	2.79804	4.64877	4.73833	3.54167	3.84701	5.22733	2.98499	1.8198	3.08511	2.39438	1.57186	2.69088	2.61919	3.714	4.63906	2.248	2.43792
3.17	3.46758	0.323636	2.75584	0.310729	2.47981	2.75429	4.55034	4.68208	3.48699	3.78764	5.18046	2.93811	1.78386	3.03198	2.36626	1.55623	2.65182	2.59262	3.664	4.57969	2.22456	2.41135
3.18	3.41804	0.321492	2.72342	0.304783	2.44074	2.6996	4.51752	4.63052	3.42917	3.72514	5.1164	2.87718	1.7698	2.97417	2.34126	1.54842	2.62057	2.56919	3.61713	4.51094	2.20269	2.37698
3.19	3.36929	0.318238	2.6906	0.300594	2.38918	2.66835	4.45971	4.57739	3.3698	3.65795	5.0664	2.82249	1.77136	2.91011	2.30376	1.54061	2.58307	2.54106	3.59525	4.44375	2.17925	2.33792
3.2	3.31617	0.314646	2.66033	0.294722	2.34074	2.63242	4.38315	4.50083	3.31511	3.58608	5.02108	2.78655	1.74792	2.84761	2.28188	1.52498	2.56276	2.52544	3.57494	4.35625	2.14488	2.31135
3.21	3.26617	0.311388	2.63084	0.289086	2.29543	2.5746	4.3394	4.43052	3.27449	3.52201	4.96171	2.72561	1.74636	2.79136	2.24907	1.53123	2.53307	2.502	3.53744	4.29375	2.12925	2.27073
3.22	3.21461	0.309014	2.5992	0.285335	2.25012	2.51835	4.29096	4.36021	3.23074	3.44076	4.91327	2.67249	1.72917	2.73979	2.21938	1.50467	2.50494	2.46919	3.50932	4.22812	2.11363	2.24417
3.23	3.16226	0.304157	2.56814	0.278672	2.21574	2.46367	4.17846	4.28989	3.18855	3.38764	4.86796	2.6303	1.71667	2.68354	2.19595	1.49217	2.47369	2.45356	3.47338	4.14531	2.10425	2.20667
3.24	3.12273	0.30423	2.53396	0.272824	2.17199	2.43242	4.18471	4.23989	3.13074	3.32826	4.82577	2.57874	1.70105	2.63354	2.17563	1.47654	2.44869	2.41919	3.44057	4.0625	2.08238	2.16604
3.25	3.06836	0.300469	2.50369	0.269107	2.12981	2.39648	4.09409	4.17896	3.0823	3.26108	4.77108	2.51468	1.6823	2.57261	2.13813	1.45623	2.41432	2.39262	3.40463	4.00625	2.06988	2.14729
3.26	3.02133	0.296076	2.47205	0.263317	2.09074	2.36367	4.03315	4.11802	3.0323	3.20014	4.70546	2.4678	1.6698	2.53198	2.12407	1.44061	2.37994	2.377	3.38432	3.91719	2.04175	2.11135
3.27	2.97758	0.29414	2.4451	0.259116	2.05168	2.3246	4.00346	4.05083	2.99324	3.12983	4.66327	2.43811	1.6573	2.46323	2.08188	1.43123	2.34869	2.36606	3.34838	3.8625	2.02613	2.09573
3.28	2.93039	0.290073	2.41892	0.257694	2.01262	2.28242	3.93159	3.98989	2.94324	3.08139	4.60702	2.38343	1.65261	2.41948	2.06313	1.41561	2.31588	2.34731	3.33119	3.82031	2.00113	2.05667
3.29	2.88508	0.28771	2.38494	0.252943	1.97981	2.24804	3.89721	3.93364	2.89011	3.02514	4.55233	2.32874	1.64792	2.34761	2.03501	1.39373	2.29401	2.31606	3.30619	3.7375	1.97925	2.0176
3.3	2.83836	0.283864	2.35896	0.249101	1.93762	2.21835	3.81909	3.85864	2.83699	2.96733	4.51483	2.29905	1.63542	2.29604	2.01626	1.38123	2.25651	2.28481	3.28275	3.68125	1.973	1.99573
3.31	2.79523	0.280609	2.32869	0.245724	1.90168	2.19023	3.76127	3.79146	2.79324	2.91108	4.46952	2.25686	1.61511	2.26167	1.98345	1.36248	2.22057	2.27544	3.25463	3.61875	1.95425	1.95979
3.32	2.75289	0.276405	2.3031	0.241595	1.87043	2.15898	3.70034	3.73833	2.74949	2.84701	4.41483	2.21468	1.61511	2.21948	1.96157	1.36092	2.19713	2.25356	3.22338	3.56562	1.95269	1.90979
3.33	2.70445	0.272038	2.27439	0.2388	1.84231	2.11992	3.64721	3.66958	2.7073	2.78451	4.3414	2.17405	1.59167	2.16636	1.92095	1.33123	2.16119	2.23481	3.19838	3.50625	1.94019	1.90198
3.34	2.66726	0.267445	2.2451	0.233821	1.82356	2.08867	3.58159	3.60552	2.66355	2.73295	4.3039	2.14593	1.59636	2.13042	1.89438	1.31873	2.13932	2.22231	3.16713	3.43125	1.93238	1.8551
3.35	2.62554	0.265574	2.22263	0.232514	1.78918	2.06523	3.55034	3.54146	2.61667	2.67045	4.26015	2.11311	1.57449	2.07417	1.84907	1.30936	2.11744	2.202	3.14057	3.40313	1.92613	1.83323
3.36	2.57898	0.262283	2.19138	0.227503	1.74543	2.02304	3.50659	3.47427	2.57605	2.6267	4.19296	2.05999	1.5698	2.01479	1.8272	1.29373	2.08151	2.18481	3.10307	3.33125	1.90738	1.80198
3.37	2.53508	0.256397	2.16111	0.224325	1.72199	1.99335	3.41284	3.41958	2.53542	2.57826	4.13046	2.00999	1.56667	1.98198	1.78345	1.27186	2.05807	2.177	3.08119	3.25781	1.89331	1.76604
3.38	2.50086	0.255085	2.14021	0.222076	1.69856	1.95742	3.41596	3.35864	2.50261	2.52045	4.08515	1.97249	1.5573	1.93979	1.75845	1.25779	2.02838	2.15669	3.04838	3.22812	1.88863	1.7551
3.39	2.45929	0.252351	2.1117	0.220271	1.66262	1.92773	3.34096	3.29146	2.46511	2.47201	4.05702	1.9428	1.54636	1.88667	1.73813	1.23279	1.99244	2.14419	3.02807	3.17187	1.86988	1.71604
3.4	2.42054	0.248607	2.08845	0.217808	1.63137	1.88867	3.27846	3.25083	2.41355	2.42201	4.0039	1.92249	1.54324	1.85073	1.70532	1.20311	1.98307	2.13012	3.00307	3.11563	1.873	1.69417
3.41	2.38367	0.245526	2.06326	0.215045	1.60012	1.86054	3.24877	3.17739	2.37761	2.37358	3.95702	1.88655	1.5323	1.82261	1.68501	1.18123	1.95651	2.11137	2.99057	3.04844	1.86363	1.66917
3.42	2.34133	0.241078	2.03318	0.213517	1.57824	1.8496	3.18471	3.11489	2.33542	2.30951	3.90077	1.84593	1.51355	1.78042	1.65376	1.16561	1.93151	2.09575	2.96088	3.00156	1.8355	1.62073
3.43	2.30336	0.2388	2.00818	0.21218	1.54231	1.80742	3.14252	3.06958	2.2948	2.25795	3.85077	1.82718	1.49792	1.74292	1.62095	1.14686	1.89869	2.08169	2.939	2.95938	1.81675	1.60198
3.44	2.26961	0.235775	1.97986	0.209244	1.51731	1.78242	3.09721	3.01646	2.26199	2.22514	3.80702	1.78499	1.50105	1.70229	1.59438	1.12811	1.86432	2.0645	2.89994	2.91094	1.79956	1.57698
3.45	2.23383	0.232243	1.95642	0.207886	1.49074	1.75742	3.03784	2.95239	2.23074	2.18139	3.76952	1.7428	1.50261	1.67261	1.56626	1.11873	1.83463	2.03794	2.87494	2.87812	1.80113	1.53948
3.46	2.19086	0.229361	1.92595	0.204342	1.46731	1.72617	2.95034	2.91021	2.18542	2.12201	3.73046	1.7053	1.48855	1.62261	1.54438	1.07967	1.80963	2.027	2.83744	2.80313	1.79175	1.51448
3.47	2.16211	0.228467	1.90037	0.204026	1.43762	1.70117	2.95502	2.85552	2.15105	2.0892	3.68983	1.67405	1.48074	1.58667	1.51313	1.05623	1.78151	2.01919	2.814	2.76406	1.77613	1.47854
3.48	2.12851	0.224475	1.8824	0.20465	1.42512	1.6871	2.90971	2.81021	2.1198	2.04076	3.63202	1.63655	1.4698	1.55386	1.48657	1.03123	1.76901	2.00669	2.79057	2.74844	1.77456	1.45198
3.49	2.08789	0.219311	1.85017	0.198672	1.40793	1.64804	2.83002	2.75083	2.07449	1.99701	3.57577	1.61624	1.45574	1.52261	1.46938	1.01561	1.74401	1.98325	2.75775	2.64844	1.76675	1.41604
3.5	2.05492	0.217326	1.82654	0.198506	1.39543	1.62929	2.79877	2.69771	2.0448	1.95795	3.53358	1.58186	1.43699	1.47261	1.43032	0.998418	1.70338	1.95669	2.72338	2.64062	1.75113	1.40823
3.51	2.02117	0.213366	1.79353	0.197959	1.36574	1.59023	2.7394	2.64771	2.01199	1.91264	3.48671	1.56155	1.4323	1.46323	1.37876	0.971855	1.67369	1.93481	2.68744	2.59375	1.74488	1.36292
3.52	1.9907	0.212263	1.76814	0.195027	1.34856	1.56835	2.70346	2.60552	1.97292	1.8767	3.45858	1.53186	1.41667	1.42417	1.35063	0.967168	1.64713	1.92544	2.66869	2.52969	1.71988	1.33635
3.53	1.95664	0.209747	1.74588	0.195673	1.33137	1.54023	2.6644	2.54771	1.94324	1.8392	3.41483	1.49749	1.4073	1.38042	1.31626	0.946855	1.60963	1.91606	2.64838	2.5	1.72769	1.30198
3.54	1.92398	0.207126	1.72068	0.193497	1.30168	1.51992	2.60971	2.49771	1.91355	1.80639	3.37577	1.48186	1.39636	1.33667	1.29595	0.923418	1.57369	1.90669	2.62494	2.44062	1.71363	1.28635
3.55	1.89336	0.204082	1.6951	0.189791	1.27512	1.49335	2.57221	2.44927	1.88699	1.77045	3.32733	1.44749	1.40261	1.30854	1.27251	0.923418	1.54557	1.8895	2.5765	2.40312	1.69488	1.2551
3.56	1.85929	0.202179	1.67381	0.188589	1.24699	1.47304	2.53471	2.40396	1.85105	1.70951	3.28515	1.44124	1.38074	1.26636	1.2397	0.903105	1.51432	1.87544	2.55307	2.3625	1.69331	1.24885
3.57	1.82726	0.199975	1.64705	0.185021	1.23762	1.43867	2.49252	2.37427	1.81824	1.67045	3.23827	1.39905	1.36199	1.24136	1.22095	0.884355	1.49401	1.86294	2.52338	2.2875	1.67925	1.22385
3.58	1.80133	0.198852	1.62498	0.185174	1.23137	1.41367	2.47065	2.33208	1.78386	1.64389	3.21015	1.36311	1.34792	1.21636	1.18345	0.873418	1.45494	1.84575	2.489	2.27969	1.673	1.20042
3.59	1.76476	0.194192	1.6031	0.182574	1.22356	1.38867	2.3769	2.26802	1.74636	1.60639	3.17421	1.3428	1.33074	1.18979	1.16782	0.857793	1.43932	1.83794	2.46557	2.2125	1.673	1.17073
3.6	1.74179	0.193035	1.58006	0.179716	1.20012	1.36523	2.36127	2.21177	1.71199	1.58295	3.1539	1.32093	1.34167	1.16792	1.12876	0.86248	1.41432	1.81294	2.44057	2.15937	1.66988	1.15198
3.61	1.71226	0.191448	1.56443	0.18093	1.17981	1.35742	2.33627	2.18521	1.68074	1.5392	3.10546	1.2928	1.31199	1.13354	1.09595	0.854668	1.38932	1.80356	2.41713	2.1625	1.66363	1.12854
3.62	1.67742	0.186282	1.5324	0.17727	1.17043	1.32773	2.24565	2.13052	1.64949	1.51576	3.05702	1.26468	1.30261	1.11011	1.07095	0.845293	1.34401	1.77856	2.38119	2.08906	1.64956	1.10042
3.63	1.65679	0.183645	1.51131	0.176896	1.14856	1.30273	2.25659	2.11802	1.61355	1.48608	2.99296	1.26624	1.27761	1.10542	1.05063	0.823418	1.31276	1.77387	2.35307	2.05156	1.64956	1.07542
3.64	1.61914	0.179809	1.48787	0.177563	1.13762	1.28242	2.2019	2.06333	1.58386	1.44701	2.93046	1.24436	1.25105	1.04917	1.00688	0.790605	1.30338	1.75669	2.31244	2.02813	1.65738	1.04729
3.65	1.59351	0.178312	1.4656	0.176969	1.11887	1.25429	2.14565	2.01802	1.56355	1.42826	2.9164	1.20999	1.23386	1.04604	0.994383	0.770293	1.28463	1.73637	2.28744	1.99375	1.64644	1.01135
3.66	1.56742	0.178353	1.44236	0.176558	1.09856	1.22773	2.12065	1.98521	1.54167	1.38295	2.89452	1.17249	1.23074	1.01948	0.947508	0.75623	1.26744	1.71606	2.25307	1.96562	1.64175	0.99104
3.67	1.54351	0.177176	1.42361	0.175895	1.10012	1.22773	2.06752	1.94146	1.51199	1.3517	2.88671	1.13499	1.20417	1.00854	0.933445	0.745293	1.24869	1.702	2.23588	1.92812	1.63394	0.961353
3.68	1.5232	0.176079	1.40232	0.176446	1.08137	1.20273	2.05971	1.91489	1.48699	1.32514	2.85233	1.11936	1.20417	0.985107	0.902195	0.735918	1.22994	1.69106	2.20932	1.90625	1.623	0.920728
3.69	1.49304	0.172352	1.38084	0.175894	1.05793	1.18398	2.02221	1.86958	1.46042	1.29545	2.79296	1.09436	1.19636	0.956982	0.881883	0.715605	1.20026	1.66919	2.17963	1.88125	1.61675	0.901978
3.7	1.46601	0.16904	1.35506	0.176246	1.04231	1.15742	2.0019	1.84302	1.44011	1.26576	2.72577	1.08186	1.18074	0.921044	0.856883	0.68748	1.17369	1.66919	2.14057	1.84844	1.60113	0.862915
3.71	1.43898	0.166062	1.34002	0.175312	1.02824	1.12148	1.94409	1.80396	1.42449	1.2267	2.6914	1.07405	1.16199	0.913232	0.83657	0.68123	1.15182	1.6645	2.11244	1.81719	1.60894	0.84729
3.72	1.41304	0.163582	1.31697	0.173462	1.02668	1.11054	1.8894	1.77427	1.39167	1.1892	2.66015	1.0553	1.13855	0.894482	0.816258	0.670293	1.14557	1.6395	2.08744	1.76094	1.60113	0.814478
3.73	1.3907	0.163689	1.29568	0.173958	1.01106	1.08242	1.89565	1.72114	1.3573	1.18139	2.63827	1.0178	1.12761	0.874169	0.791258	0.640605	1.13151	1.62075	2.05463	1.74219	1.59488	0.789478
3.74	1.36945	0.160843	1.27068	0.175722	1.00012	1.07148	1.85659	1.69146	1.33386	1.15326	2.60233	1.00686	1.11667	0.861669	0.763133	0.61248	1.11744	1.60825	2.03744	1.69688	1.58706	0.742603
3.75	1.34648	0.159335	1.25017	0.173376	0.984494	1.05898	1.81127	1.66021	1.31355	1.12514	2.57733	0.994363	1.1073	0.831982	0.760008	0.596855	1.10182	1.59419	2.00619	1.64531	1.57769	0.719165
3.76	1.32226	0.156221	1.2322	0.175622	0.965744	1.04023	1.76752	1.62896	1.28074	1.10639	2.53827	0.980301	1.0823	0.831982	0.73032	0.58123	1.08619	1.58169	1.98432	1.65312	1.5605	0.680103
3.77	1.29695	0.152536	1.21248	0.175805	0.948556	1.01367	1.71596	1.59146	1.24636	1.08139	2.49608	0.989676	1.06824	0.817919	0.702195	0.560918	1.06119	1.56762	1.95932	1.61875	1.56363	0.66604
3.78	1.27414	0.151254	1.1947	0.174825	0.939181	0.990229	1.69409	1.56021	1.2198	1.05483	2.46327	0.966238	1.06042	0.792919	0.683445	0.54373	1.05182	1.55356	1.92025	1.60469	1.55269	0.64729
3.79	1.25367	0.149676	1.17849	0.174311	0.942306	0.998042	1.65971	1.53052	1.19636	1.02983	2.43515	0.931863	1.05261	0.760107	0.670945	0.535918	1.03932	1.53794	1.89213	1.58125	1.55269	0.617603
3.8	1.23008	0.147385	1.16013	0.17386	0.928244	0.988667	1.62534	1.49458	1.17761	1.00951	2.40077	0.892801	1.01824	0.764794	0.65532	0.51873	1.02526	1.50981	1.87494	1.54688	1.55113	0.598853
3.81	1.20695	0.144344	1.14099	0.173536	0.921994	0.971479	1.58627	1.46177	1.16824	0.992326	2.35546	0.856863	1.00417	0.750732	0.639695	0.489043	1.02057	1.48325	1.84838	1.53125	1.53394	0.581665
3.82	1.18726	0.141845	1.11541	0.173135	0.911056	0.963667	1.56752	1.42739	1.12917	0.970451	2.31952	0.861551	0.988548	0.733544	0.610008	0.465605	1.01432	1.45825	1.80463	1.47969	1.54331	0.54729
3.83	1.16945	0.13995	1.09646	0.173028	0.903244	0.935542	1.55034	1.39927	1.09636	0.956388	2.28827	0.863113	0.985423	0.716357	0.597508	0.451543	0.998695	1.44419	1.77025	1.47812	1.51988	0.511353
3.84	1.14898	0.135299	1.08357	0.172162	0.896994	0.930854	1.47377	1.36177	1.08542	0.932951	2.25077	0.881863	0.977611	0.697607	0.569383	0.453105	0.992445	1.42544	1.74838	1.45937	1.51831	0.501978
3.85	1.13195	0.134515	1.05974	0.170229	0.882931	0.921479	1.48315	1.34771	1.06667	0.906388	2.21327	0.864676	0.955736	0.677294	0.569383	0.43123	0.97682	1.41137	1.72025	1.39375	1.50269	0.47229
3.86	1.11336	0.133077	1.04373	0.168651	0.878244	0.891792	1.46752	1.31958	1.04636	0.879826	2.18515	0.841238	0.944798	0.678857	0.553758	0.41873	0.95807	1.39106	1.68432	1.40156	1.47769	0.464478
3.87	1.08758	0.133193	1.02381	0.168494	0.865744	0.879292	1.42221	1.31489	1.02449	0.857951	2.15858	0.797488	0.915111	0.639794	0.53657	0.39998	0.947132	1.35981	1.65775	1.37969	1.47144	0.437915
3.88	1.06867	0.130205	1.00642	0.168117	0.859494	0.857417	1.40034	1.28521	1.00417	0.843888	2.11796	0.783426	0.893236	0.641357	0.520945	0.373418	0.93932	1.352	1.62807	1.33906	1.47144	0.426978
3.89	1.04633	0.125509	0.992166	0.168185	0.843869	0.858979	1.36596	1.24927	0.972923	0.829826	2.06171	0.767801	0.872923	0.639794	0.519383	0.359355	0.931507	1.34262	1.59682	1.33906	1.45581	0.392603
3.9	1.03179	0.124712	0.971267	0.166395	0.832931	0.843354	1.35346	1.23208	0.949486	0.809513	2.03983	0.778738	0.860423	0.617919	0.495945	0.340605	0.917445	1.32231	1.56713	1.29688	1.44175	0.387915
3.91	1.01226	0.122089	0.955251	0.164897	0.806369	0.832417	1.31284	1.20552	0.933861	0.790763	2.00702	0.783426	0.840111	0.610107	0.497508	0.323418	0.894007	1.29887	1.54369	1.2875	1.42144	0.375415
3.92	0.996639	0.120161	0.934353	0.164763	0.790744	0.827729	1.28627	1.17114	0.918236	0.770451	1.98358	0.774051	0.838548	0.605419	0.470945	0.30623	0.875257	1.27387	1.51713	1.27188	1.40425	0.355103
3.93	0.980389	0.118796	0.921462	0.163353	0.793869	0.801167	1.29721	1.14302	0.901048	0.753263	1.94452	0.761551	0.826048	0.581982	0.470945	0.296855	0.873695	1.26606	1.49057	1.23906	1.398	0.336353
3.94	0.95992	0.115721	0.898611	0.163167	0.789181	0.790229	1.22065	1.11333	0.886986	0.747013	1.91952	0.728738	0.827611	0.575732	0.43657	0.284355	0.856507	1.23637	1.45307	1.22969	1.38238	0.30979
3.95	0.93742	0.112998	0.882009	0.160305	0.790744	0.774604	1.20346	1.09146	0.854173	0.736076	1.8664	0.702176	0.807298	0.547607	0.439695	0.28123	0.842445	1.21762	1.43119	1.17812	1.37144	0.294165
3.96	0.924764	0.111163	0.868728	0.160462	0.776681	0.758979	1.22065	1.05552	0.836986	0.720451	1.83358	0.689676	0.797923	0.556982	0.42407	0.265605	0.83932	1.20356	1.41244	1.16562	1.3605	0.27854
3.97	0.905076	0.107647	0.8574	0.160236	0.770431	0.751167	1.14721	1.03989	0.818236	0.709513	1.80077	0.692801	0.777611	0.542919	0.416258	0.257793	0.829945	1.18637	1.38275	1.16719	1.35894	0.25979
3.98	0.893045	0.106957	0.832205	0.159092	0.770431	0.744917	1.14877	1.03052	0.797923	0.692326	1.77577	0.681863	0.757298	0.530419	0.394383	0.23748	0.822132	1.1645	1.34682	1.11719	1.34175	0.233228
3.99	0.87867	0.104108	0.819705	0.158345	0.765744	0.737104	1.11596	0.997706	0.780736	0.682951	1.74608	0.681863	0.755736	0.522607	0.39907	0.228105	0.804945	1.14731	1.31869	1.12969	1.32144	0.208228
4	0.86242	0.101536	0.802517	0.156332	0.750119	0.732417	1.09096	0.974268	0.774486	0.650138	1.71327	0.669363	0.732298	0.536669	0.378758	0.228105	0.79557	1.13169	1.289	1.09687	1.30581	0.194165
4.01	0.844295	0.100814	0.780837	0.152981	0.742306	0.713667	1.08002	0.933643	0.758861	0.653263	1.68671	0.656863	0.722923	0.494482	0.363133	0.226543	0.772132	1.10669	1.264	1.06406	1.26831	0.181665
4.02	0.828982	0.0998187	0.769509	0.153469	0.728244	0.699604	1.04565	0.905518	0.746361	0.634513	1.67421	0.634988	0.721361	0.499169	0.352195	0.207793	0.772132	1.09419	1.24682	1.07187	1.24644	0.164478
4.03	0.816482	0.100334	0.751345	0.151492	0.723556	0.680854	1.05034	0.886768	0.726048	0.623576	1.65858	0.631863	0.715111	0.467919	0.344383	0.195293	0.762757	1.06919	1.21713	1.02812	1.24175	0.151978
4.04	0.804139	0.0961188	0.73865	0.14945	0.717306	0.677729	1.00971	0.869581	0.718236	0.617326	1.61952	0.630301	0.704173	0.477294	0.339695	0.19373	0.748695	1.04575	1.2015	1	1.23394	0.145728
4.05	0.791326	0.0945271	0.733181	0.14942	0.721994	0.669917	1.02221	0.844581	0.708861	0.603263	1.58202	0.619363	0.679173	0.461669	0.33657	0.179668	0.74557	1.027	1.18119	1.025	1.22769	0.142603
4.06	0.773201	0.0916623	0.711306	0.14697	0.714181	0.663667	0.972211	0.818018	0.699486	0.604826	1.55077	0.597488	0.654173	0.456982	0.310008	0.17498	0.729945	1.00825	1.14994	0.978125	1.20738	0.131665
4.07	0.762732	0.089136	0.696853	0.14426	0.715744	0.652729	0.940961	0.802393	0.686986	0.586076	1.52577	0.595926	0.655736	0.464794	0.314695	0.16873	0.725257	0.994185	1.12807	0.94375	1.18238	0.117603
4.08	0.753982	0.0898833	0.683962	0.145904	0.704806	0.646479	0.981586	0.764893	0.674486	0.576701	1.51327	0.580301	0.630736	0.466357	0.281883	0.16248	0.71432	0.964498	1.09994	0.978125	1.17613	0.0941653
4.09	0.733514	0.0880809	0.671072	0.141696	0.698556	0.649604	0.903461	0.736768	0.661986	0.562638	1.49296	0.581863	0.615111	0.431982	0.302195	0.142168	0.715882	0.95356	1.07494	0.9375	1.14488	0.0972903
4.1	0.728201	0.0845633	0.654666	0.139397	0.687619	0.649604	0.903461	0.730518	0.647923	0.570451	1.45546	0.570926	0.621361	0.444482	0.28657	0.142168	0.700257	0.93481	1.05463	0.921875	1.11206	0.0847903
4.11	0.712732	0.0835706	0.644705	0.139702	0.686056	0.629292	0.894086	0.719581	0.633861	0.550138	1.42421	0.575613	0.596361	0.417919	0.297508	0.115605	0.68932	0.917623	1.02963	0.921875	1.11363	0.0722903
4.12	0.702107	0.0816389	0.625955	0.137715	0.686056	0.626167	0.864399	0.699268	0.629173	0.557951	1.39921	0.561551	0.597923	0.399169	0.278758	0.117168	0.672132	0.900435	0.995253	0.878125	1.10894	0.0566653
4.13	0.689451	0.0800114	0.620095	0.136348	0.678244	0.616792	0.853461	0.683643	0.619798	0.550138	1.37421	0.542801	0.565111	0.410107	0.281883	0.11248	0.66432	0.887935	0.976503	0.884375	1.098	0.0551028
4.14	0.680232	0.0777922	0.599978	0.1352	0.673556	0.612104	0.825336	0.661768	0.607298	0.551701	1.35233	0.550613	0.560423	0.406982	0.269383	0.0937302	0.66432	0.85981	0.937441	0.864063	1.07769	0.0332279
4.15	0.670701	0.0761201	0.587478	0.132628	0.662619	0.602729	0.814399	0.658643	0.596361	0.536076	1.3289	0.550613	0.544798	0.411669	0.26157	0.0952927	0.65807	0.836373	0.924941	0.85	1.048	0.0254153
4.16	0.658201	0.0758627	0.575369	0.131046	0.654806	0.587104	0.806586	0.627393	0.580736	0.531388	1.31327	0.547488	0.540111	0.392919	0.238133	0.0968552	0.65807	0.811373	0.907753	0.85	1.02144	0.0191653
4.17	0.642576	0.0732649	0.565017	0.128128	0.653244	0.582417	0.762836	0.607081	0.558861	0.525138	1.28046	0.542801	0.529173	0.383544	0.244383	0.0874802	0.667445	0.795748	0.882753	0.826562	0.998002	0.0176028
4.18	0.636326	0.0715018	0.555251	0.128004	0.654806	0.583979	0.765961	0.621143	0.554173	0.501701	1.25077	0.528738	0.516673	0.385107	0.231883	0.0827927	0.66432	0.787935	0.860878	0.817187	0.991752	0.00510285
4.19	0.626951	0.0711043	0.544119	0.125799	0.646994	0.574604	0.775336	0.577393	0.547923	0.509513	1.23358	0.528738	0.504173	0.371044	0.235008	0.0843552	0.65182	0.764498	0.839003	0.815625	0.969877	-0.00739715
4.2	0.61492	0.0688606	0.532009	0.123323	0.636056	0.571479	0.708149	0.558643	0.543236	0.507951	1.21952	0.524051	0.505736	0.374169	0.233445	0.0812302	0.63932	0.74106	0.815566	0.8	0.955815	-0.0105222
4.21	0.610701	0.0665224	0.520291	0.122675	0.632931	0.571479	0.736274	0.563331	0.530736	0.493888	1.18358	0.509988	0.504173	0.380419	0.219383	0.0843552	0.634632	0.72856	0.796816	0.76875	0.955815	-0.0261471
4.22	0.596482	0.0642938	0.510134	0.122166	0.621994	0.565229	0.703461	0.536768	0.522923	0.489201	1.15546	0.509988	0.477611	0.381982	0.216258	0.0640427	0.636195	0.70981	0.768691	0.779688	0.937065	-0.0308347
4.23	0.585389	0.063065	0.493142	0.11913	0.623556	0.548042	0.690961	0.525831	0.501048	0.489201	1.13202	0.495926	0.472923	0.374169	0.208445	0.0749802	0.619007	0.687935	0.731191	0.75	0.92144	-0.0480222
4.24	0.577576	0.0628972	0.482595	0.117071	0.623556	0.557417	0.689399	0.502393	0.488548	0.481388	1.11483	0.508426	0.454173	0.355419	0.194383	0.0718552	0.604945	0.675435	0.737441	0.732812	0.89019	-0.0464596
4.25	0.564451	0.0602902	0.475759	0.115855	0.620431	0.546479	0.659711	0.480518	0.482298	0.472013	1.08046	0.500613	0.451048	0.350732	0.191258	0.0749802	0.598695	0.662935	0.728066	0.742187	0.863627	-0.0558346
4.26	0.560076	0.0598934	0.466775	0.114603	0.623556	0.540229	0.659711	0.474268	0.479173	0.461076	1.07108	0.492801	0.441673	0.356982	0.178758	0.0734177	0.592445	0.648873	0.717128	0.729687	0.851127	-0.0573971
4.27	0.549295	0.0600504	0.452126	0.112203	0.621994	0.530854	0.628461	0.452393	0.472923	0.456388	1.06483	0.484988	0.436986	0.342919	0.169383	0.0734177	0.58307	0.636373	0.682753	0.70625	0.832377	-0.0667722
4.28	0.542107	0.0578979	0.446462	0.111124	0.629806	0.529292	0.619086	0.439893	0.463548	0.457951	1.03358	0.474051	0.429173	0.344482	0.17407	0.0749802	0.572132	0.619185	0.670253	0.71875	0.816752	-0.0745846
4.29	0.530545	0.0558767	0.430251	0.109481	0.623556	0.527729	0.569086	0.428956	0.455736	0.440763	1.01015	0.481863	0.421361	0.346044	0.175633	0.0687302	0.556507	0.605123	0.640566	0.698438	0.793315	-0.0964596
4.3	0.525545	0.0547014	0.413845	0.106653	0.607931	0.518354	0.587836	0.418018	0.454173	0.447013	0.991396	0.467801	0.426048	0.336669	0.141258	0.0702927	0.540882	0.587935	0.629628	0.66875	0.763627	-0.0917722
4.31	0.523045	0.0536265	0.407791	0.108117	0.604806	0.524604	0.590961	0.408643	0.451048	0.437638	0.974209	0.491238	0.402611	0.344482	0.135008	0.0656052	0.536195	0.564498	0.614003	0.701563	0.754252	-0.10896
4.32	0.509764	0.0514385	0.3949	0.105945	0.586056	0.527729	0.536274	0.402393	0.443236	0.428263	0.947646	0.488113	0.410423	0.327294	0.113133	0.0656052	0.528382	0.544185	0.604628	0.657812	0.751127	-0.105835
4.33	0.502732	0.0524906	0.388455	0.10269	0.586056	0.526167	0.565961	0.382081	0.432298	0.412638	0.938271	0.475613	0.385423	0.322607	0.12407	0.0640427	0.52682	0.537935	0.584316	0.660937	0.712065	-0.10271
4.34	0.498045	0.0511938	0.379861	0.102386	0.593869	0.513667	0.551899	0.371143	0.426048	0.415763	0.921084	0.472488	0.393236	0.321044	0.103758	0.0624802	0.512757	0.52856	0.568691	0.673437	0.693315	-0.104272
4.35	0.491326	0.0507079	0.366775	0.0991146	0.590744	0.502729	0.515961	0.371143	0.427611	0.415763	0.916396	0.470926	0.382298	0.319482	0.114695	0.0452927	0.512757	0.51606	0.548378	0.640625	0.662065	-0.105835
4.36	0.483201	0.0476875	0.361111	0.0998466	0.587619	0.496479	0.528461	0.352393	0.411986	0.414201	0.872646	0.459988	0.385423	0.322607	0.102195	0.0437302	0.500257	0.50356	0.543691	0.648437	0.660502	-0.113647
4.37	0.473514	0.0471314	0.355251	0.0961015	0.592306	0.496479	0.505024	0.330518	0.393236	0.397013	0.855459	0.445926	0.385423	0.333544	0.108445	0.0452927	0.511195	0.486373	0.520253	0.632813	0.638627	-0.101147
4.38	0.466326	0.0449261	0.342947	0.0943401	0.589181	0.487104	0.490961	0.322706	0.391673	0.390763	0.822646	0.459988	0.383861	0.324169	0.0943829	0.0452927	0.50182	0.473873	0.517128	0.609375	0.610502	-0.10896
4.39	0.464607	0.045625	0.336501	0.0921652	0.586056	0.498042	0.486274	0.308643	0.386986	0.387638	0.822646	0.466238	0.383861	0.319482	0.0943829	0.0343552	0.50182	0.45356	0.503066	0.615625	0.58394	-0.0948971
4.4	0.459295	0.0449717	0.323025	0.091508	0.576681	0.482417	0.473774	0.316456	0.386986	0.386076	0.816396	0.466238	0.380736	0.306982	0.0678204	0.0359177	0.486195	0.43481	0.492128	0.598438	0.573002	-0.104272
4.41	0.455076	0.0431014	0.31697	0.0893096	0.579806	0.479292	0.473774	0.300831	0.377611	0.382951	0.786709	0.472488	0.376048	0.321044	0.0740704	0.0359177	0.475257	0.431685	0.476503	0.585938	0.560502	-0.104272
4.42	0.450076	0.0426402	0.303689	0.0889528	0.582931	0.483979	0.476899	0.299268	0.380736	0.375138	0.769521	0.459988	0.360423	0.311669	0.0662579	0.0234177	0.462757	0.412935	0.468691	0.579687	0.53394	-0.118335
4.43	0.441795	0.0407855	0.297634	0.0868212	0.581369	0.476167	0.422211	0.283643	0.365111	0.390763	0.741396	0.475613	0.358861	0.322607	0.0850079	0.00310523	0.461195	0.408248	0.446816	0.575	0.512065	-0.110522
4.44	0.43492	0.0406433	0.287869	0.0860203	0.579806	0.446479	0.451899	0.285206	0.349486	0.382951	0.733584	0.453738	0.357298	0.308544	0.0709454	0.00623022	0.44557	0.39731	0.426503	0.56875	0.505815	-0.118335
4.45	0.428982	0.0387124	0.281619	0.0823924	0.570431	0.448042	0.453461	0.271143	0.352611	0.382951	0.702334	0.447488	0.360423	0.300732	0.0787579	0.0124802	0.431507	0.376998	0.404628	0.557813	0.498002	-0.107397
4.46	0.420701	0.0375712	0.265603	0.0806632	0.562619	0.446479	0.408149	0.261768	0.341673	0.387638	0.685146	0.452176	0.347923	0.313232	0.0537579	0.00935522	0.42057	0.362935	0.387441	0.534375	0.469877	-0.113647
4.47	0.416795	0.0375302	0.26072	0.0808637	0.557931	0.452729	0.425336	0.257081	0.321361	0.378263	0.675771	0.442801	0.338548	0.317919	0.0396954	0.0140427	0.409632	0.34731	0.378066	0.559375	0.451127	-0.113647
4.48	0.408982	0.038528	0.247244	0.0813974	0.553244	0.452729	0.380024	0.239893	0.321361	0.364201	0.669521	0.464676	0.340111	0.303857	0.0256329	-0.00470728	0.406507	0.331685	0.367128	0.554688	0.423002	-0.126147
4.49	0.406639	0.0374852	0.240017	0.0786161	0.540744	0.452729	0.398774	0.230518	0.321361	0.365763	0.661709	0.445926	0.338548	0.310107	0.0334454	-0.00314479	0.394007	0.326998	0.353066	0.525	0.419877	-0.129272
4.5	0.398201	0.0364053	0.237869	0.0785014	0.532931	0.449604	0.401899	0.232081	0.315111	0.353263	0.641396	0.431863	0.321361	0.302294	0.0225079	-0.00626978	0.38307	0.325435	0.342128	0.539062	0.41519	-0.118335
4.51	0.393982	0.0357968	0.229275	0.0749972	0.536056	0.443354	0.383149	0.222706	0.316673	0.356388	0.625771	0.431863	0.321361	0.302294	0.0209454	-0.00626978	0.369007	0.30981	0.337441	0.5125	0.399565	-0.10896
4.52	0.391014	0.0347739	0.225564	0.0746239	0.532931	0.429292	0.409711	0.216456	0.313548	0.342326	0.607021	0.430301	0.326048	0.302294	0.0100079	-0.00158229	0.37057	0.30356	0.324941	0.515625	0.388627	-0.107397
4.53	0.38492	0.0350903	0.215798	0.0735772	0.528244	0.433979	0.394086	0.207081	0.311986	0.337638	0.597646	0.431863	0.315111	0.291357	0.0131329	-0.0187698	0.359632	0.29731	0.315566	0.503125	0.368315	-0.112085
4.54	0.378357	0.034499	0.208572	0.07281	0.526681	0.441792	0.333149	0.194581	0.310423	0.343888	0.580459	0.424051	0.327611	0.300732	0.00688291	-0.0125198	0.361195	0.28481	0.303066	0.496875	0.349565	-0.12146
4.55	0.382576	0.033782	0.205837	0.0724742	0.515744	0.430854	0.415961	0.196143	0.307298	0.337638	0.574209	0.431863	0.321361	0.294482	-0.000929589	-0.0140823	0.356507	0.264498	0.309316	0.501562	0.343315	-0.113647
4.56	0.373045	0.0325906	0.199392	0.0703337	0.507931	0.423042	0.364399	0.185206	0.305736	0.340763	0.555459	0.428738	0.321361	0.297607	-0.000929589	-0.0203323	0.33307	0.250435	0.304628	0.49375	0.337065	-0.10271
4.57	0.366639	0.0331041	0.189431	0.0708122	0.511056	0.415229	0.356586	0.177393	0.296361	0.331388	0.546084	0.427176	0.315111	0.289794	-0.0181171	-0.0140823	0.325257	0.250435	0.287441	0.495312	0.310502	-0.12146
4.58	0.368201	0.0338167	0.183962	0.0703448	0.511056	0.412104	0.397211	0.171143	0.291673	0.326701	0.546084	0.427176	0.311986	0.286669	-0.0337421	-0.0156448	0.31432	0.237935	0.279628	0.504688	0.293315	-0.10896
4.59	0.358982	0.0329225	0.177322	0.0694261	0.511056	0.407417	0.331586	0.172706	0.301048	0.317326	0.541396	0.406863	0.304173	0.296044	-0.0259296	-0.0172073	0.300257	0.244185	0.271816	0.49375	0.276127	-0.124585
4.6	0.35492	0.0321892	0.172634	0.067377	0.506369	0.408979	0.358149	0.178956	0.294798	0.303263	0.532021	0.384988	0.299486	0.281982	-0.0384296	-0.0109573	0.298695	0.230123	0.265566	0.482812	0.263627	-0.110522
4.61	0.348982	0.0317795	0.162478	0.0671033	0.492306	0.410542	0.345649	0.157081	0.285423	0.312638	0.508584	0.395926	0.299486	0.281982	-0.0384296	-0.0328323	0.28932	0.219185	0.254628	0.475	0.248002	-0.11521
4.62	0.343514	0.0333797	0.151736	0.0666358	0.498556	0.412104	0.328461	0.139893	0.283861	0.304826	0.500771	0.403738	0.282298	0.280419	-0.0571796	-0.0359573	0.278382	0.206685	0.239003	0.46875	0.230815	-0.116772
4.63	0.347732	0.033234	0.145876	0.066766	0.500119	0.408979	0.356586	0.133643	0.282298	0.301701	0.497646	0.403738	0.310423	0.281982	-0.0587421	-0.0406448	0.281507	0.198873	0.226503	0.46875	0.213627	-0.123022
4.64	0.341951	0.0323136	0.139236	0.0661025	0.490744	0.402729	0.326899	0.146143	0.280736	0.312638	0.492959	0.408426	0.293236	0.264794	-0.0649921	-0.0422073	0.275257	0.19731	0.221816	0.4625	0.188627	-0.124585
4.65	0.341951	0.0324721	0.140212	0.0647458	0.492306	0.401167	0.345649	0.136768	0.286986	0.298576	0.485146	0.406863	0.302611	0.263232	-0.0571796	-0.0297073	0.27057	0.194185	0.212441	0.467188	0.182377	-0.118335
4.66	0.333514	0.0322078	0.130056	0.0641288	0.481369	0.398042	0.317524	0.132081	0.286986	0.295451	0.477334	0.400613	0.293236	0.252294	-0.0712421	-0.0500198	0.265882	0.187935	0.204628	0.45	0.166752	-0.113647
4.67	0.336795	0.0313103	0.126541	0.0634606	0.478244	0.399604	0.319086	0.136768	0.280736	0.295451	0.482021	0.391238	0.315111	0.269482	-0.0696796	-0.0562698	0.25807	0.187935	0.199941	0.44375	0.162065	-0.113647
4.68	0.338357	0.0317085	0.122439	0.0635231	0.481369	0.398042	0.345649	0.130518	0.280736	0.295451	0.469521	0.408426	0.307298	0.266357	-0.0759296	-0.0562698	0.253382	0.181685	0.192128	0.442188	0.160502	-0.118335
4.69	0.32367	0.0310914	0.117166	0.0601745	0.470431	0.394917	0.283149	0.119581	0.283861	0.290763	0.442959	0.395926	0.293236	0.261669	-0.0681171	-0.0547073	0.242445	0.176998	0.179628	0.420312	0.151127	-0.110522
4.7	0.328045	0.0298123	0.103689	0.0605684	0.464181	0.387104	0.331586	0.130518	0.276048	0.287638	0.446084	0.397488	0.290111	0.269482	-0.0915546	-0.0578323	0.229945	0.169185	0.168691	0.4125	0.119877	-0.12146
4.71	0.32492	0.0302835	0.100369	0.0606378	0.459494	0.394917	0.325336	0.128956	0.271361	0.282951	0.438271	0.405301	0.290111	0.252294	-0.0915546	-0.0484573	0.219007	0.150435	0.168691	0.428125	0.0948774	-0.118335
4.72	0.323826	0.0304795	0.0933374	0.059097	0.457931	0.390229	0.287836	0.125831	0.263548	0.295451	0.435146	0.420926	0.288548	0.272607	-0.104055	-0.0468948	0.204945	0.151998	0.159316	0.4125	0.0823774	-0.113647
4.73	0.32367	0.0302405	0.0939233	0.0578883	0.457931	0.391792	0.322211	0.113331	0.265111	0.289201	0.424209	0.405301	0.290111	0.277294	-0.10093	-0.0422073	0.187757	0.145748	0.153066	0.417187	0.0933149	-0.10271
4.74	0.316951	0.0299349	0.0884546	0.0581493	0.451681	0.393354	0.292524	0.113331	0.266673	0.290763	0.424209	0.384988	0.297923	0.253857	-0.118117	-0.0312698	0.17057	0.145748	0.137441	0.421875	0.0823774	-0.101147
4.75	0.316014	0.0296886	0.0857202	0.0564279	0.456369	0.388667	0.312836	0.108643	0.263548	0.295451	0.400771	0.388113	0.294798	0.250732	-0.111867	-0.0297073	0.17057	0.145748	0.134316	0.409375	0.0636274	-0.0964596
4.76	0.307732	0.029898	0.0816187	0.0557579	0.457931	0.373042	0.298774	0.0992682	0.263548	0.287638	0.388271	0.378738	0.293236	0.236669	-0.108742	-0.0375198	0.165882	0.137935	0.134316	0.4	0.0636274	-0.10271
4.77	0.29867	0.0295959	0.0769312	0.0545635	0.457931	0.365229	0.250336	0.103956	0.254173	0.297013	0.369521	0.372488	0.288548	0.227294	-0.114992	-0.0500198	0.162757	0.13481	0.129628	0.385938	0.0589399	-0.0917722
4.78	0.303982	0.0293644	0.0726343	0.0547011	0.448556	0.368354	0.334711	0.0945807	0.243236	0.287638	0.372646	0.366238	0.276048	0.247607	-0.12593	-0.0265823	0.161195	0.126998	0.115566	0.3875	0.0417524	-0.0995846
4.79	0.296326	0.029298	0.059939	0.0543569	0.453244	0.365229	0.228461	0.111768	0.246361	0.292326	0.369521	0.377176	0.279173	0.239794	-0.139992	-0.0328323	0.140882	0.108248	0.112441	0.375	0.0245649	-0.10896
4.8	0.299451	0.028712	0.0603296	0.0549146	0.442306	0.363667	0.264399	0.0992682	0.257298	0.289201	0.358584	0.388113	0.290111	0.241357	-0.133742	-0.0390823	0.142445	0.10981	0.114003	0.38125	0.0167524	-0.10896
4.81	0.298982	0.0285573	0.0570093	0.0555118	0.443869	0.365229	0.289399	0.0945807	0.255736	0.279826	0.357021	0.372488	0.290111	0.241357	-0.147805	-0.0468948	0.122132	0.119185	0.109316	0.384375	0.0167524	-0.101147
4.82	0.292264	0.0290231	0.0517358	0.053648	0.432931	0.357417	0.226899	0.0977057	0.251048	0.289201	0.349209	0.392801	0.288548	0.236669	-0.130617	-0.0562698	0.111195	0.114498	0.0983782	0.373437	0.00737737	-0.104272
4.83	0.29492	0.0284926	0.049978	0.05595	0.437619	0.346479	0.278461	0.0945807	0.241673	0.292326	0.349209	0.388113	0.282298	0.238232	-0.136867	-0.0609573	0.11432	0.11606	0.0983782	0.3875	-0.0113726	-0.107397
4.84	0.29117	0.0293897	0.0439233	0.0559773	0.440744	0.352729	0.248774	0.0852057	0.251048	0.282951	0.342959	0.381863	0.293236	0.231982	-0.152492	-0.0750198	0.10182	0.117623	0.0905657	0.378125	-0.000435125	-0.10896
4.85	0.288045	0.0286895	0.0329858	0.0545544	0.431369	0.346479	0.265961	0.0867682	0.252611	0.279826	0.338271	0.378738	0.285423	0.214794	-0.160305	-0.0812698	0.0908821	0.125435	0.0796282	0.35	-0.0238726	-0.116772
4.86	0.287732	0.0288035	0.0275171	0.0525657	0.431369	0.340229	0.275336	0.0789557	0.240111	0.276701	0.325771	0.386551	0.282298	0.239794	-0.166555	-0.0734573	0.0799446	0.10981	0.0796282	0.334375	-0.0332476	-0.110522
4.87	0.280701	0.0292483	0.0232202	0.0545741	0.425119	0.327729	0.234711	0.0758307	0.230736	0.270451	0.333584	0.388113	0.279173	0.241357	-0.166555	-0.0859573	0.0690071	0.101998	0.0733782	0.351563	-0.0379351	-0.119897
4.88	0.285389	0.0276924	0.0191187	0.0559033	0.425119	0.326167	0.247211	0.0961432	0.227611	0.287638	0.330459	0.388113	0.288548	0.236669	-0.174367	-0.10002	0.0643196	0.0941851	0.0718157	0.35625	-0.0301226	-0.129272
4.89	0.275545	0.0287799	0.0152124	0.0572658	0.415744	0.324604	0.245649	0.0727057	0.224486	0.267326	0.330459	0.377176	0.274486	0.222607	-0.179055	-0.10627	0.0565071	0.0957476	0.0702532	0.360938	-0.0363726	-0.14021
4.9	0.27117	0.0291245	0.00466552	0.0564245	0.417306	0.327729	0.245649	0.0695807	0.226048	0.262638	0.319521	0.374051	0.260423	0.208544	-0.20093	-0.110957	0.0486946	0.101998	0.0608782	0.334375	-0.0551226	-0.141772
4.91	0.269139	0.0301026	0.00173584	0.0563836	0.418869	0.337104	0.253461	0.0570807	0.221361	0.257951	0.317959	0.364676	0.260423	0.202294	-0.204055	-0.109395	0.0346321	0.0988726	0.0593157	0.334375	-0.0566851	-0.143335
4.92	0.266014	0.0290631	0.00154053	0.0563997	0.420431	0.327729	0.203461	0.0773932	0.227611	0.257951	0.313271	0.369363	0.247923	0.214794	-0.197805	-0.117207	0.0268196	0.0988726	0.0483782	0.342187	-0.0551226	-0.13396
4.93	0.270076	0.0286782	-0.0082251	0.0541984	0.421994	0.326167	0.251899	0.0664557	0.229173	0.272013	0.297646	0.364676	0.251048	0.219482	-0.199367	-0.114082	0.0158821	0.0941851	0.0343157	0.314062	-0.0566851	-0.154272
4.94	0.265232	0.029334	-0.0127173	0.0539048	0.418869	0.321479	0.225336	0.0617682	0.227611	0.256388	0.289834	0.377176	0.244798	0.228857	-0.204055	-0.123457	0.0127571	0.0863726	0.0343157	0.307812	-0.0644976	-0.151147
4.95	0.263201	0.0297734	-0.0177954	0.0561049	0.421994	0.318354	0.203461	0.0664557	0.226048	0.262638	0.288271	0.381863	0.236986	0.225732	-0.218117	-0.132832	0.00650712	0.0785601	0.0358782	0.317188	-0.0676226	-0.162085
4.96	0.265389	0.0286792	-0.0234595	0.0563745	0.418869	0.316792	0.259711	0.0602057	0.221361	0.256388	0.288271	0.363113	0.233861	0.235107	-0.233742	-0.13127	0.00338212	0.0816851	0.0311907	0.307812	-0.0832476	-0.163647
4.97	0.258826	0.0298242	-0.0271704	0.0569964	0.415744	0.323042	0.195649	0.0680182	0.221361	0.259513	0.275771	0.383426	0.227611	0.217919	-0.25093	-0.132832	-0.00443038	0.0707476	0.0343157	0.307812	-0.0816851	-0.160522
4.98	0.261014	0.029524	-0.0269751	0.0583588	0.418869	0.321479	0.230024	0.0586432	0.215111	0.262638	0.277334	0.370926	0.222923	0.231982	-0.239992	-0.135957	-0.00443038	0.0785601	0.0296282	0.320313	-0.0910601	-0.173022
4.99	0.255701	0.0290893	-0.0347876	0.0594546	0.407931	0.316792	0.215961	0.0602057	0.224486	0.250138	0.269521	0.374051	0.224486	0.213232	-0.252492	-0.14377	-0.0231804	0.0879351	0.0265032	0.3125	-0.0973101	-0.188647
5	0.249451	0.0286089	-0.0388892	0.0584266	0.400119	0.305854	0.206586	0.0570807	0.215111	0.240763	0.257021	0.367801	0.235423	0.208544	-0.252492	-0.15002	-0.0200554	0.0879351	0.0280657	0.29375	-0.100435	-0.198022
5.01	0.248514	0.0281838	-0.0451392	0.0600312	0.406369	0.288667	0.236274	0.0570807	0.208861	0.245451	0.247646	0.359988	0.227611	0.206982	-0.277492	-0.146895	-0.0278679	0.0738726	0.0280657	0.298438	-0.106685	-0.20271
5.02	0.246795	0.028121	-0.0511938	0.0607444	0.395431	0.293354	0.209711	0.0555182	0.205736	0.232951	0.261709	0.363113	0.238548	0.211669	-0.283742	-0.16252	-0.0388054	0.0613726	0.0124407	0.30625	-0.10356	-0.201147
5.03	0.247576	0.0289794	-0.0615454	0.0613239	0.389181	0.288667	0.237836	0.0461432	0.207298	0.228263	0.267959	0.378738	0.216673	0.214794	-0.286867	-0.189082	-0.0388054	0.0473101	0.0108782	0.298438	-0.120748	-0.213647
5.04	0.24242	0.0285319	-0.0584204	0.0620474	0.386056	0.283979	0.208149	0.0398932	0.202611	0.229826	0.255459	0.363113	0.226048	0.228857	-0.280617	-0.184395	-0.0528679	0.0613726	0.0171282	0.30625	-0.119185	-0.21521
5.05	0.24242	0.0276432	-0.0646704	0.0603053	0.387619	0.285542	0.198774	0.0570807	0.207298	0.239201	0.263271	0.359988	0.213548	0.211669	-0.28218	-0.18127	-0.0731804	0.0582476	0.0140032	0.2875	-0.123873	-0.216772
5.06	0.240389	0.0290992	-0.0689673	0.0610247	0.389181	0.287104	0.203461	0.0398932	0.213548	0.240763	0.249209	0.366238	0.205736	0.208544	-0.291555	-0.178145	-0.0731804	0.0629351	-5.93359e-05	0.285938	-0.130123	-0.22771
5.07	0.240389	0.0282684	-0.0720923	0.0630749	0.387619	0.282417	0.190961	0.0523932	0.213548	0.232951	0.266396	0.363113	0.210423	0.203857	-0.31343	-0.179707	-0.0841179	0.0613726	0.00775316	0.292187	-0.133248	-0.22771
5.08	0.240545	0.0285158	-0.077561	0.0615049	0.398556	0.279292	0.186274	0.0539557	0.211986	0.239201	0.255459	0.359988	0.211986	0.208544	-0.318117	-0.184395	-0.0934929	0.0551226	-0.00318434	0.276562	-0.12856	-0.224585
5.09	0.237576	0.0287255	-0.0816626	0.0634844	0.390744	0.273042	0.192524	0.0461432	0.204173	0.226701	0.247646	0.366238	0.204173	0.224169	-0.31968	-0.19377	-0.0966179	0.0473101	-0.00318434	0.289062	-0.13481	-0.241772
5.1	0.235701	0.0293209	-0.0896704	0.0626054	0.387619	0.288667	0.189399	0.0461432	0.201048	0.226701	0.244521	0.369363	0.185423	0.217919	-0.322805	-0.195332	-0.109118	0.0332476	-0.0109968	0.279688	-0.14731	-0.244897
5.11	0.233826	0.0289965	-0.0972876	0.0613185	0.386056	0.291792	0.178461	0.0477057	0.207298	0.229826	0.235146	0.359988	0.177611	0.224169	-0.322805	-0.20627	-0.126305	0.0379351	-0.0188093	0.259375	-0.155123	-0.24646
5.12	0.231795	0.0287063	-0.0972876	0.0601828	0.371994	0.293354	0.190961	0.0430182	0.202611	0.231388	0.241396	0.359988	0.168236	0.214794	-0.31343	-0.198457	-0.127868	0.0269976	-0.00787184	0.253125	-0.158248	-0.25271
5.13	0.22867	0.0290785	-0.100022	0.0597855	0.364181	0.291792	0.184711	0.0414557	0.196361	0.232951	0.247646	0.364676	0.160423	0.202294	-0.32593	-0.204707	-0.134118	0.0301226	-0.00630933	0.240625	-0.155123	-0.244897
5.14	0.226951	0.0294816	-0.100803	0.0594968	0.370431	0.274604	0.180024	0.0289557	0.196361	0.220451	0.247646	0.358426	0.163548	0.228857	-0.31968	-0.20627	-0.146618	0.0410601	-0.00162183	0.23125	-0.15356	-0.251147
5.15	0.224764	0.0290971	-0.104514	0.063006	0.364181	0.271479	0.178461	0.0289557	0.197923	0.226701	0.239834	0.358426	0.163548	0.217919	-0.336867	-0.221895	-0.16068	0.0363726	-0.00787184	0.257812	-0.156685	-0.24646
5.16	0.226482	0.0289914	-0.109983	0.0620587	0.371994	0.257417	0.198774	0.0398932	0.199486	0.229826	0.235146	0.366238	0.149486	0.216357	-0.329055	-0.226582	-0.163805	0.0348101	-0.0109968	0.242188	-0.158248	-0.268335
5.17	0.216482	0.0300964	-0.113108	0.0619728	0.370431	0.248042	0.161274	0.0227057	0.201048	0.228263	0.222646	0.356863	0.144798	0.208544	-0.339992	-0.223457	-0.16068	0.0332476	-0.0250593	0.240625	-0.164498	-0.26521
5.18	0.214295	0.0299179	-0.120334	0.0657996	0.371994	0.249604	0.153461	0.0320807	0.196361	0.228263	0.216396	0.352176	0.130736	0.211669	-0.352492	-0.234395	-0.174743	0.0332476	-0.0406843	0.265625	-0.181685	-0.27771
5.19	0.223357	0.0297883	-0.126975	0.0636163	0.370431	0.252729	0.190961	0.0305182	0.204173	0.237638	0.225771	0.367801	0.143236	0.210107	-0.355617	-0.240645	-0.184118	0.0348101	-0.0328718	0.23125	-0.187935	-0.280835
5.2	0.216326	0.032273	-0.130881	0.0625714	0.370431	0.252729	0.161274	0.0117682	0.196361	0.217326	0.225771	0.381863	0.136986	0.208544	-0.358742	-0.25627	-0.187243	0.0363726	-0.0328718	0.214062	-0.19106	-0.27146
5.21	0.217264	0.0306825	-0.134983	0.065834	0.365744	0.248042	0.206586	0.0148932	0.201048	0.220451	0.222646	0.364676	0.129173	0.199169	-0.379055	-0.251582	-0.21068	0.0332476	-0.0359968	0.232812	-0.181685	-0.287085
5.22	0.214295	0.0316998	-0.137717	0.067194	0.362619	0.246479	0.153461	0.0102057	0.205736	0.214201	0.230459	0.370926	0.129173	0.219482	-0.380617	-0.253145	-0.209118	0.0269976	-0.0359968	0.24375	-0.19731	-0.29646
5.23	0.21242	0.0318578	-0.143381	0.0665129	0.367306	0.255854	0.153461	0.0102057	0.215111	0.215763	0.227334	0.359988	0.116673	0.202294	-0.379055	-0.260957	-0.218493	0.0269976	-0.0406843	0.23125	-0.206685	-0.299585
5.24	0.213201	0.0331872	-0.146116	0.0674554	0.375119	0.258979	0.155024	-0.000731806	0.208861	0.223576	0.227334	0.366238	0.119798	0.197607	-0.37593	-0.278145	-0.22943	0.0379351	-0.0516218	0.234375	-0.20981	-0.29646
5.25	0.208201	0.032016	-0.153733	0.0678035	0.361056	0.252729	0.158149	0.0023932	0.207298	0.220451	0.225771	0.353738	0.105736	0.194482	-0.391555	-0.28752	-0.240368	0.0316851	-0.0563093	0.225	-0.208248	-0.30271
5.26	0.205545	0.0320469	-0.160374	0.0657686	0.357931	0.249604	0.150336	0.0086432	0.196361	0.229826	0.216396	0.353738	0.0916733	0.200732	-0.391555	-0.298457	-0.246618	0.0223101	-0.0609968	0.203125	-0.212935	-0.298022
5.27	0.200857	0.0325844	-0.163108	0.0677505	0.362619	0.240229	0.126899	0.0164557	0.190111	0.223576	0.210146	0.355301	0.0807358	0.202294	-0.404055	-0.284395	-0.259118	0.0254351	-0.0609968	0.210937	-0.217623	-0.31521
5.28	0.201482	0.0316432	-0.162131	0.0684519	0.364181	0.243354	0.151899	0.0039557	0.190111	0.217326	0.210146	0.341238	0.0994858	0.192919	-0.404055	-0.292207	-0.257555	0.0223101	-0.0656843	0.221875	-0.20981	-0.312085
5.29	0.198045	0.0337677	-0.171311	0.0713753	0.361056	0.249604	0.115961	-0.000731806	0.190111	0.222013	0.228896	0.350613	0.0822983	0.180419	-0.421242	-0.30627	-0.263805	0.0269976	-0.0609968	0.221875	-0.230123	-0.337085
5.3	0.195076	0.0313528	-0.171702	0.0687163	0.361056	0.240229	0.133149	0.0117682	0.196361	0.215763	0.205459	0.320926	0.0729233	0.192919	-0.41968	-0.30002	-0.26068	0.0113726	-0.0719343	0.2125	-0.22231	-0.323022
5.31	0.192264	0.0325162	-0.184592	0.0676141	0.357931	0.237104	0.142524	0.0023932	0.196361	0.214201	0.192959	0.328738	0.0557358	0.194482	-0.42593	-0.309395	-0.277868	0.000435128	-0.0828718	0.1875	-0.223873	-0.344897
5.32	0.189295	0.0323118	-0.186155	0.0706614	0.356369	0.227729	0.131586	-0.000731806	0.202611	0.220451	0.194521	0.314676	0.0526108	0.192919	-0.43843	-0.317207	-0.280993	0.00512263	-0.0906843	0.207813	-0.22231	-0.35271
5.33	0.188357	0.0298327	-0.193772	0.0735175	0.343869	0.230854	0.144086	0.0164557	0.199486	0.217326	0.186709	0.302176	0.0557358	0.186669	-0.449367	-0.33127	-0.29818	0.0144976	-0.0875593	0.209375	-0.23481	-0.373022
5.34	0.189764	0.030894	-0.200803	0.0722407	0.353244	0.240229	0.137836	0.0180182	0.199486	0.218888	0.189834	0.305301	0.0494858	0.185107	-0.449367	-0.335957	-0.31068	0.0129351	-0.100059	0.192187	-0.24106	-0.374585
5.35	0.18867	0.031825	-0.203733	0.0705949	0.346994	0.248042	0.145649	0.0023932	0.191673	0.211076	0.188271	0.316238	0.0494858	0.186669	-0.443117	-0.342207	-0.30443	0.00668513	-0.0969343	0.175	-0.242623	-0.382397
5.36	0.188982	0.0331745	-0.205881	0.072764	0.343869	0.240229	0.147211	-0.000731806	0.193236	0.215763	0.196084	0.334988	0.0354233	0.183544	-0.45093	-0.359395	-0.301305	0.00199763	-0.0938093	0.185938	-0.233248	-0.39646
5.37	0.184607	0.0335994	-0.209202	0.0720439	0.359494	0.230854	0.122211	0.0023932	0.186986	0.214201	0.189834	0.324051	0.0338608	0.181982	-0.45718	-0.360957	-0.29818	0.00199763	-0.0984968	0.175	-0.24106	-0.394897
5.38	0.182576	0.0338764	-0.215647	0.0736869	0.362619	0.230854	0.139399	-0.0022943	0.191673	0.201701	0.185146	0.313113	0.0197983	0.183544	-0.461867	-0.35627	-0.312243	-0.00268987	-0.0984968	0.179687	-0.255123	-0.418335
5.39	0.180857	0.0335845	-0.213499	0.0737532	0.351681	0.227729	0.140961	-0.0085443	0.196361	0.198576	0.188271	0.314676	0.0213608	0.177294	-0.458742	-0.36252	-0.327868	-0.00425237	-0.100059	0.1875	-0.242623	-0.399585
5.4	0.178826	0.0324263	-0.223655	0.0730412	0.345431	0.229292	0.144086	0.0102057	0.196361	0.192326	0.182021	0.311551	0.0151108	0.161669	-0.46343	-0.379707	-0.334118	-0.00581488	-0.0984968	0.160937	-0.256685	-0.412085
5.41	0.170701	0.0325505	-0.228928	0.0738436	0.343869	0.224604	0.115961	0.0039557	0.196361	0.189201	0.160146	0.306863	0.0229233	0.142919	-0.480617	-0.379707	-0.340368	-0.0151899	-0.120372	0.16875	-0.248873	-0.41521
5.42	0.174451	0.0340853	-0.233225	0.0747822	0.336056	0.215229	0.153461	-0.0179193	0.186986	0.195451	0.167959	0.324051	0.00729826	0.175732	-0.479055	-0.38752	-0.352868	-0.0105024	-0.129747	0.170312	-0.25356	-0.423022
5.43	0.173045	0.0329381	-0.237717	0.0750169	0.342306	0.212104	0.150336	-0.0085443	0.183861	0.198576	0.167959	0.303738	0.00886076	0.171044	-0.458742	-0.392207	-0.365368	-0.0151899	-0.139122	0.175	-0.26606	-0.44021
5.44	0.17117	0.0338777	-0.241819	0.075424	0.340744	0.219917	0.120649	0.0086432	0.176048	0.193888	0.178896	0.313113	-0.0130142	0.172607	-0.466555	-0.392207	-0.363805	-0.0198774	-0.146934	0.176562	-0.275435	-0.44646
5.45	0.169295	0.0352725	-0.248069	0.0716981	0.353244	0.215229	0.144086	-0.0101068	0.176048	0.192326	0.166396	0.306863	-0.0208267	0.169482	-0.474367	-0.385957	-0.37318	-0.0386274	-0.148497	0.145312	-0.276998	-0.432397
5.46	0.166482	0.0348957	-0.256663	0.0738046	0.342306	0.218354	0.144086	-0.0085443	0.176048	0.186076	0.172646	0.302176	-0.0286392	0.160107	-0.483742	-0.40627	-0.384118	-0.0370649	-0.162559	0.146875	-0.273873	-0.45271
5.47	0.166639	0.0344903	-0.259592	0.0741787	0.340744	0.218354	0.133149	0.0039557	0.182298	0.187638	0.185146	0.297488	-0.0333267	0.150732	-0.491555	-0.403145	-0.390368	-0.0401899	-0.167247	0.148438	-0.280123	-0.45271
5.48	0.16117	0.0347169	-0.259397	0.0754554	0.343869	0.216792	0.0847112	0.0039557	0.183861	0.176701	0.180459	0.291238	-0.0270767	0.156982	-0.48218	-0.40627	-0.393493	-0.0308149	-0.178184	0.15625	-0.27231	-0.468335
5.49	0.165076	0.0343721	-0.263499	0.0748799	0.340744	0.210542	0.151899	-0.0085443	0.177611	0.178263	0.182021	0.295926	-0.0270767	0.149169	-0.479055	-0.414082	-0.396618	-0.0292524	-0.181309	0.14375	-0.276998	-0.474585
5.5	0.158982	0.0342473	-0.266624	0.0730165	0.334494	0.215229	0.128461	-0.00541931	0.172923	0.176701	0.174209	0.288113	-0.0348892	0.139794	-0.472805	-0.403145	-0.395055	-0.0339399	-0.198497	0.13125	-0.27856	-0.482397
5.51	0.153201	0.0348437	-0.275608	0.0740425	0.328244	0.210542	0.0987737	-0.0101068	0.171361	0.162638	0.167959	0.288113	-0.0442642	0.158544	-0.491555	-0.407832	-0.405993	-0.0433149	-0.206309	0.13125	-0.292623	-0.488647
5.52	0.160857	0.0346497	-0.27385	0.0770607	0.325119	0.219917	0.151899	-0.00541931	0.174486	0.182951	0.163271	0.295926	-0.0458267	0.146044	-0.505617	-0.401582	-0.412243	-0.0386274	-0.209434	0.157813	-0.295748	-0.485522
5.53	0.154295	0.0353561	-0.278342	0.0749352	0.332931	0.218354	0.0909612	-0.0038568	0.160423	0.193888	0.171084	0.278738	-0.0520767	0.152294	-0.502492	-0.398457	-0.418493	-0.0276899	-0.207872	0.121875	-0.298873	-0.494897
5.54	0.154607	0.0366558	-0.280295	0.078116	0.342306	0.221479	0.115961	-0.0163568	0.157298	0.182951	0.167959	0.291238	-0.0552017	0.138232	-0.514992	-0.407832	-0.434118	-0.0323774	-0.210997	0.148438	-0.29731	-0.493335
5.55	0.151326	0.0358798	-0.282639	0.0784417	0.332931	0.207417	0.122211	-0.0210443	0.165111	0.170451	0.171084	0.277176	-0.0614517	0.149169	-0.518117	-0.417207	-0.42943	-0.0417524	-0.215684	0.153125	-0.294185	-0.498022
5.56	0.148826	0.0376913	-0.285959	0.0744136	0.342306	0.219917	0.115961	-0.0460443	0.174486	0.164201	0.146084	0.272488	-0.0614517	0.160107	-0.511867	-0.414082	-0.426305	-0.0448774	-0.229747	0.120313	-0.292623	-0.488647
5.57	0.147732	0.037901	-0.288889	0.0763008	0.329806	0.202729	0.128461	-0.0429193	0.168236	0.165763	0.147646	0.294363	-0.0723892	0.155419	-0.516555	-0.414082	-0.434118	-0.0542524	-0.234434	0.135937	-0.29106	-0.50271
5.58	0.145545	0.0385061	-0.295725	0.0760201	0.331369	0.205854	0.108149	-0.0319818	0.154173	0.176701	0.144521	0.294363	-0.0864517	0.158544	-0.536867	-0.404707	-0.445055	-0.0573774	-0.246934	0.121875	-0.29106	-0.505835
5.59	0.147576	0.0385229	-0.299631	0.0776133	0.328244	0.215229	0.120649	-0.0226068	0.132298	0.167326	0.158584	0.297488	-0.0927017	0.171044	-0.53843	-0.410957	-0.451305	-0.0558149	-0.245372	0.125	-0.295748	-0.524585
5.6	0.147576	0.0383188	-0.299436	0.079885	0.332931	0.215229	0.120649	-0.0288568	0.151048	0.176701	0.166396	0.291238	-0.0848892	0.135107	-0.560305	-0.403145	-0.452868	-0.0605024	-0.246934	0.14375	-0.292623	-0.523022
5.61	0.145701	0.03764	-0.301389	0.0759299	0.328244	0.215229	0.105024	-0.0226068	0.160423	0.175138	0.157021	0.278738	-0.0880142	0.147607	-0.546242	-0.398457	-0.452868	-0.0542524	-0.253184	0.104687	-0.289498	-0.52146
5.62	0.14367	0.037424	-0.30178	0.0783917	0.325119	0.218354	0.117524	-0.0272943	0.144798	0.165763	0.158584	0.280301	-0.0848892	0.138232	-0.56343	-0.404707	-0.462243	-0.0511274	-0.256309	0.125	-0.295748	-0.505835
5.63	0.141482	0.0374992	-0.3051	0.0784398	0.329806	0.204292	0.0956487	-0.0351068	0.143236	0.176701	0.150771	0.269363	-0.0817642	0.161669	-0.555617	-0.40002	-0.459118	-0.0589399	-0.260997	0.125	-0.300435	-0.530835
5.64	0.137107	0.0379229	-0.306663	0.077097	0.318869	0.196479	0.103461	-0.0382318	0.143236	0.173576	0.149209	0.270926	-0.0989517	0.152294	-0.554055	-0.404707	-0.459118	-0.0620649	-0.259434	0.114062	-0.30356	-0.524585
5.65	0.132576	0.0385499	-0.303538	0.0794293	0.325119	0.196479	0.0831487	-0.0382318	0.140111	0.157951	0.138271	0.269363	-0.103639	0.156982	-0.549367	-0.403145	-0.46068	-0.0745649	-0.268809	0.15	-0.295748	-0.526147
5.66	0.137889	0.0376275	-0.316233	0.0775524	0.331369	0.187104	0.128461	-0.0069818	0.143236	0.150138	0.139834	0.266238	-0.114577	0.153857	-0.568117	-0.41877	-0.462243	-0.0839399	-0.281309	0.120313	-0.30981	-0.526147
5.67	0.136951	0.0384789	-0.319749	0.0781078	0.325119	0.198042	0.100336	-0.0147943	0.132298	0.151701	0.146084	0.278738	-0.114577	0.166357	-0.56968	-0.415645	-0.471618	-0.0761274	-0.301622	0.120313	-0.317623	-0.526147
5.68	0.13367	0.0389173	-0.315842	0.0803025	0.323556	0.191792	0.0768987	-0.0210443	0.129173	0.159513	0.155459	0.277176	-0.116139	0.160107	-0.566555	-0.41252	-0.476305	-0.0605024	-0.306309	0.135937	-0.311373	-0.529272
5.69	0.130701	0.0377118	-0.324045	0.0776331	0.311056	0.188667	0.0972112	-0.0226068	0.124486	0.157951	0.146084	0.266238	-0.117702	0.155419	-0.572805	-0.410957	-0.480993	-0.0714399	-0.315684	0.10625	-0.31606	-0.530835
5.7	0.128357	0.0393738	-0.324631	0.0790032	0.317306	0.198042	0.0909612	-0.0319818	0.119798	0.154826	0.147646	0.261551	-0.131764	0.156982	-0.571242	-0.429707	-0.487243	-0.0683149	-0.296934	0.1125	-0.32231	-0.53396
5.71	0.130232	0.0386232	-0.327366	0.0780465	0.323556	0.177729	0.119086	-0.0366693	0.116673	0.161076	0.138271	0.256863	-0.120827	0.166357	-0.571242	-0.423457	-0.480993	-0.0808149	-0.315684	0.110938	-0.319185	-0.538647
5.72	0.125701	0.0405175	-0.325413	0.0783104	0.323556	0.191792	0.0643987	-0.0272943	0.127611	0.153263	0.141396	0.272488	-0.139577	0.149169	-0.564992	-0.426582	-0.48568	-0.0839399	-0.315684	0.11875	-0.311373	-0.53396
5.73	0.125701	0.0410746	-0.330491	0.0792138	0.328244	0.193354	0.0878362	-0.0304193	0.126048	0.162638	0.127334	0.267801	-0.148952	0.142919	-0.572805	-0.43752	-0.490368	-0.0870649	-0.318809	0.120313	-0.319185	-0.538647
5.74	0.128982	0.0394103	-0.335959	0.0794788	0.328244	0.185542	0.108149	-0.0147943	0.119798	0.167326	0.113271	0.264676	-0.136452	0.153857	-0.583742	-0.435957	-0.487243	-0.0870649	-0.326622	0.1125	-0.326998	-0.55271
5.75	0.122576	0.0417127	-0.341038	0.0782278	0.318869	0.188667	0.0659612	-0.0194818	0.116673	0.161076	0.119521	0.274051	-0.163014	0.163232	-0.59468	-0.421895	-0.495055	-0.101127	-0.321934	0.096875	-0.331685	-0.55896
5.76	0.122576	0.0416359	-0.3426	0.0799928	0.328244	0.174604	0.0987737	-0.0429193	0.119798	0.164201	0.130459	0.259988	-0.158327	0.150732	-0.585305	-0.432832	-0.50443	-0.107377	-0.332872	0.11875	-0.33481	-0.562085
5.77	0.123514	0.0425475	-0.347288	0.0802282	0.328244	0.176167	0.0909612	-0.0444818	0.121361	0.162638	0.133584	0.272488	-0.163014	0.156982	-0.585305	-0.44377	-0.51068	-0.112065	-0.331309	0.117188	-0.345748	-0.566772
5.78	0.120701	0.0430276	-0.350217	0.0781966	0.331369	0.191792	0.0862737	-0.0476068	0.111986	0.173576	0.119521	0.259988	-0.167702	0.147607	-0.577492	-0.448457	-0.512243	-0.119877	-0.340684	0.096875	-0.325435	-0.574585
5.79	0.118201	0.0427002	-0.35217	0.0808639	0.318869	0.183979	0.0878362	-0.0429193	0.105736	0.173576	0.117959	0.255301	-0.177077	0.158544	-0.585305	-0.454707	-0.505993	-0.126127	-0.346934	0.11875	-0.326998	-0.59021
5.8	0.11992	0.0428397	-0.355491	0.0825484	0.323556	0.193354	0.0831487	-0.0319818	0.116673	0.167326	0.125771	0.263113	-0.178639	0.136669	-0.58843	-0.45627	-0.524743	-0.12769	-0.348497	0.121875	-0.31606	-0.604272
5.81	0.114295	0.0429175	-0.360178	0.0796199	0.314181	0.177729	0.0862737	-0.0304193	0.110423	0.157951	0.119521	0.252176	-0.195827	0.150732	-0.589992	-0.464082	-0.526305	-0.123002	-0.354747	0.09375	-0.330123	-0.587085
5.82	0.11367	0.042765	-0.362913	0.0799296	0.307931	0.177729	0.0800237	-0.0366693	0.119798	0.156388	0.116396	0.255301	-0.192702	0.152294	-0.583742	-0.454707	-0.52943	-0.129252	-0.356309	0.0953125	-0.339498	-0.605835
5.83	0.114139	0.045015	-0.367014	0.0801595	0.317306	0.174604	0.0706487	-0.0460443	0.108861	0.165763	0.116396	0.277176	-0.200514	0.156982	-0.583742	-0.45002	-0.540368	-0.138627	-0.376622	0.0984375	-0.337935	-0.607397
5.84	0.115389	0.0440458	-0.369358	0.0795523	0.307931	0.173042	0.0862737	-0.0413568	0.104173	0.156388	0.119521	0.280301	-0.195827	0.163232	-0.57593	-0.453145	-0.546618	-0.141752	-0.381309	0.0921875	-0.337935	-0.610522
5.85	0.115545	0.0440708	-0.369553	0.0831724	0.306369	0.180854	0.0925237	-0.0382318	0.107298	0.153263	0.107021	0.277176	-0.198952	0.167919	-0.585305	-0.45627	-0.551305	-0.144877	-0.389122	0.125	-0.34106	-0.613647
5.86	0.114607	0.0452208	-0.375999	0.0789183	0.315744	0.177729	0.0847112	-0.0366693	0.121361	0.167326	0.100771	0.269363	-0.213014	0.158544	-0.593117	-0.45627	-0.54818	-0.144877	-0.385997	0.078125	-0.34731	-0.610522
5.87	0.111014	0.0465522	-0.375217	0.0830151	0.306369	0.174604	0.0878362	-0.0397943	0.104173	0.168888	0.102334	0.272488	-0.233327	0.166357	-0.596242	-0.454707	-0.559118	-0.14644	-0.396934	0.114062	-0.344185	-0.618335
5.88	0.106326	0.0466392	-0.373264	0.0852149	0.300119	0.169917	0.0768987	-0.0413568	0.102611	0.167326	0.108584	0.264676	-0.242702	0.156982	-0.599367	-0.454707	-0.552868	-0.14644	-0.396934	0.1375	-0.351998	-0.62146
5.89	0.10242	0.0468747	-0.384397	0.08108	0.304806	0.162104	0.0862737	-0.0444818	0.0901108	0.164201	0.0945214	0.263113	-0.245827	0.149169	-0.60718	-0.460957	-0.54818	-0.154252	-0.396934	0.0875	-0.361373	-0.63396
5.9	0.0980449	0.0470722	-0.38967	0.0818593	0.300119	0.160542	0.0534612	-0.0272943	0.0807358	0.162638	0.0835839	0.263113	-0.253639	0.156982	-0.610305	-0.457832	-0.563805	-0.160502	-0.404747	0.0875	-0.364498	-0.643335
5.91	0.102732	0.0464912	-0.388108	0.0841221	0.298556	0.173042	0.0831487	-0.0413568	0.0869858	0.168888	0.0929589	0.252176	-0.245827	0.158544	-0.60718	-0.460957	-0.570055	-0.166752	-0.415684	0.1125	-0.35356	-0.643335
5.92	0.103514	0.0470135	-0.390452	0.0823914	0.295431	0.169917	0.0706487	-0.0476068	0.0932358	0.178263	0.0976464	0.259988	-0.245827	0.163232	-0.60718	-0.446895	-0.559118	-0.168315	-0.426622	0.096875	-0.362935	-0.649585
5.93	0.100389	0.0472639	-0.386741	0.0851527	0.303244	0.169917	0.0456487	-0.0444818	0.102611	0.182951	0.100771	0.245926	-0.250514	0.147607	-0.622805	-0.446895	-0.552868	-0.163627	-0.417247	0.117188	-0.35356	-0.654272
5.94	0.103826	0.0471094	-0.392795	0.0833235	0.300119	0.171479	0.0972112	-0.0522943	0.102611	0.168888	0.0976464	0.253738	-0.250514	0.149169	-0.618117	-0.46877	-0.552868	-0.173002	-0.429747	0.10625	-0.362935	-0.643335
5.95	0.0967949	0.0474637	-0.405491	0.0822656	0.295431	0.165229	0.0565862	-0.0382318	0.101048	0.165763	0.0820214	0.256863	-0.261452	0.144482	-0.624367	-0.476582	-0.562243	-0.187065	-0.442247	0.08125	-0.36606	-0.666772
5.96	0.0983574	0.0485857	-0.401584	0.0838459	0.298556	0.163667	0.0972112	-0.0663568	0.0963608	0.157951	0.0804589	0.261551	-0.263014	0.156982	-0.614992	-0.485957	-0.565368	-0.191752	-0.440684	0.109375	-0.370748	-0.65271
5.97	0.0919512	0.0488354	-0.402366	0.0833176	0.295431	0.166792	0.0315862	-0.0522943	0.101048	0.154826	0.0742089	0.258426	-0.269264	0.158544	-0.61968	-0.471895	-0.54818	-0.188627	-0.454747	0.103125	-0.37856	-0.660522
5.98	0.0957012	0.0473298	-0.405295	0.0833736	0.295431	0.166792	0.0565862	-0.0460443	0.0963608	0.151701	0.0867089	0.241238	-0.261452	0.169482	-0.618117	-0.473457	-0.546618	-0.188627	-0.464122	0.101563	-0.387935	-0.66521
5.99	0.100857	0.0484646	-0.407249	0.0857487	0.298556	0.166792	0.0831487	-0.0397943	0.101048	0.159513	0.0898339	0.256863	-0.272389	0.164794	-0.63218	-0.46877	-0.557555	-0.194877	-0.471934	0.11875	-0.38481	-0.666772
6	0.0935137	0.0485895	-0.409788	0.0807387	0.290744	0.174604	0.0190862	-0.0491693	0.0994858	0.154826	0.0820214	0.263113	-0.263014	0.163232	-0.616555	-0.464082	-0.559118	-0.199565	-0.471934	0.075	-0.376998	-0.66521
6.01	0.0974199	0.0496433	-0.409788	0.0834607	0.295431	0.177729	0.0878362	-0.0569818	0.0916733	0.153263	0.0820214	0.272488	-0.277077	0.147607	-0.627492	-0.459395	-0.57318	-0.205815	-0.475059	0.101563	-0.381685	-0.657397
6.02	0.0932012	0.0490495	-0.412522	0.0840077	0.293869	0.174604	0.0472112	-0.0491693	0.0901108	0.165763	0.0773339	0.255301	-0.275514	0.152294	-0.621242	-0.478145	-0.571618	-0.219877	-0.475059	0.115625	-0.395748	-0.654272
6.03	0.0953887	0.050217	-0.421897	0.0806194	0.303244	0.171479	0.0503362	-0.0554193	0.0885483	0.168888	0.0835839	0.259988	-0.280202	0.163232	-0.624367	-0.479707	-0.563805	-0.229252	-0.487559	0.0796875	-0.406685	-0.663647
6.04	0.0960137	0.0492019	-0.417209	0.0811441	0.301681	0.177729	0.0597112	-0.0507318	0.0854233	0.170451	0.0851464	0.252176	-0.273952	0.152294	-0.61968	-0.47502	-0.55443	-0.229252	-0.482872	0.09375	-0.412935	-0.657397
6.05	0.0955449	0.0500352	-0.416428	0.0819051	0.295431	0.180854	0.0425237	-0.0554193	0.0916733	0.176701	0.0835839	0.258426	-0.278639	0.160107	-0.630617	-0.467207	-0.55443	-0.223002	-0.489122	0.096875	-0.411373	-0.65271
6.06	0.0925762	0.0503282	-0.421897	0.0815296	0.282931	0.182417	0.0722112	-0.0569818	0.0885483	0.164201	0.0617089	0.259988	-0.291139	0.161669	-0.655617	-0.465645	-0.546618	-0.235502	-0.493809	0.0875	-0.411373	-0.654272
6.07	0.0891387	0.0501467	-0.419749	0.08199	0.281369	0.173042	0.0628362	-0.0632318	0.0838608	0.162638	0.0726464	0.255301	-0.292702	0.155419	-0.647805	-0.464082	-0.54818	-0.24644	-0.492247	0.101563	-0.411373	-0.649585
6.08	0.0878887	0.0493174	-0.425803	0.0835628	0.282931	0.166792	0.0425237	-0.0632318	0.0885483	0.162638	0.0757714	0.247488	-0.283327	0.158544	-0.647805	-0.457832	-0.557555	-0.255815	-0.500059	0.104687	-0.414498	-0.67771
6.09	0.0880449	0.0483769	-0.426975	0.0805175	0.279806	0.165229	0.0628362	-0.0663568	0.0885483	0.161076	0.0898339	0.233426	-0.281764	0.147607	-0.65093	-0.451582	-0.557555	-0.25894	-0.500059	0.0796875	-0.411373	-0.66521
6.1	0.0852324	0.0494069	-0.432053	0.0803472	0.276681	0.168354	0.0518987	-0.0585443	0.0979233	0.167326	0.0726464	0.227176	-0.298952	0.147607	-0.647805	-0.453145	-0.563805	-0.260502	-0.517247	0.0734375	-0.417623	-0.669897
6.11	0.0849199	0.050516	-0.429319	0.0843112	0.284494	0.166792	0.0675237	-0.0710443	0.0916733	0.172013	0.0679589	0.233426	-0.303639	0.139794	-0.65093	-0.457832	-0.565368	-0.25894	-0.525059	0.1125	-0.425435	-0.663647
6.12	0.0832012	0.0498379	-0.434202	0.0819548	0.279806	0.166792	0.0440862	-0.0647943	0.0885483	0.172013	0.0679589	0.234988	-0.297389	0.139794	-0.654055	-0.45627	-0.56693	-0.24644	-0.531309	0.0796875	-0.430123	-0.668335
6.13	0.0838262	0.0496893	-0.43342	0.0834251	0.281369	0.166792	0.0534612	-0.0585443	0.0854233	0.175138	0.0632714	0.236551	-0.297389	0.131982	-0.655617	-0.45627	-0.563805	-0.25894	-0.531309	0.096875	-0.425435	-0.673022
6.14	0.0830449	0.0511823	-0.440842	0.0831236	0.273556	0.163667	0.0690862	-0.0647943	0.0838608	0.157951	0.0710839	0.245926	-0.317702	0.147607	-0.666555	-0.467207	-0.54818	-0.27144	-0.542247	0.0921875	-0.445748	-0.67771
6.15	0.0774199	0.051253	-0.447678	0.0793446	0.282931	0.162104	0.0347112	-0.0726068	0.0822983	0.157951	0.0663964	0.241238	-0.313014	0.131982	-0.666555	-0.453145	-0.559118	-0.276127	-0.554747	0.0546875	-0.456685	-0.669897
6.16	0.0821074	0.0521598	-0.443967	0.0837025	0.287619	0.165229	0.0784612	-0.0726068	0.0744858	0.156388	0.0648339	0.247488	-0.320827	0.139794	-0.671242	-0.446895	-0.565368	-0.27144	-0.559434	0.090625	-0.45356	-0.674585
6.17	0.0800762	0.0530629	-0.442209	0.0832425	0.290744	0.176167	0.0550237	-0.0757318	0.0744858	0.157951	0.0648339	0.252176	-0.325514	0.130419	-0.66343	-0.442207	-0.562243	-0.274565	-0.570372	0.090625	-0.445748	-0.669897
6.18	0.0796074	0.0534578	-0.44885	0.0820999	0.284494	0.179292	0.0315862	-0.0788568	0.0854233	0.165763	0.0632714	0.244363	-0.328639	0.149169	-0.668117	-0.445332	-0.562243	-0.279252	-0.575059	0.0765625	-0.46606	-0.67146
6.19	0.0841387	0.05192	-0.445334	0.0829499	0.281369	0.176167	0.0722112	-0.0632318	0.0854233	0.162638	0.0726464	0.241238	-0.323952	0.136669	-0.65093	-0.459395	-0.555993	-0.282377	-0.565684	0.0953125	-0.470748	-0.673022
6.2	0.0774199	0.0535598	-0.448655	0.0823996	0.276681	0.176167	0.0487737	-0.0710443	0.0729233	0.157951	0.0632714	0.244363	-0.341139	0.146044	-0.65093	-0.46252	-0.545055	-0.294877	-0.584434	0.090625	-0.467623	-0.674585
6.21	0.0757012	0.0529242	-0.453733	0.0827894	0.287619	0.169917	0.0628362	-0.0647943	0.0697983	0.150138	0.0492089	0.234988	-0.338014	0.135107	-0.655617	-0.467207	-0.552868	-0.293315	-0.589122	0.0859375	-0.475435	-0.682397
6.22	0.0785137	0.052356	-0.453928	0.0827904	0.271994	0.169917	0.0847112	-0.0726068	0.0729233	0.156388	0.0523339	0.233426	-0.333327	0.149169	-0.66968	-0.451582	-0.551305	-0.301127	-0.590684	0.0859375	-0.47856	-0.674585
6.23	0.0713262	0.0530317	-0.457639	0.0815784	0.275119	0.163667	0.0143987	-0.0569818	0.0713608	0.156388	0.0476464	0.239676	-0.341139	0.142919	-0.66968	-0.451582	-0.545055	-0.313627	-0.589122	0.071875	-0.47231	-0.691772
6.24	0.0766387	0.0530186	-0.452756	0.0836911	0.273556	0.165229	0.0628362	-0.0694818	0.0651108	0.157951	0.0570214	0.247488	-0.338014	0.144482	-0.658742	-0.451582	-0.552868	-0.318315	-0.587559	0.101563	-0.473873	-0.680835
6.25	0.0697637	0.0532176	-0.453538	0.0827542	0.264181	0.168354	0.0503362	-0.0804193	0.0588608	0.162638	0.0617089	0.225613	-0.348952	0.135107	-0.64468	-0.445332	-0.56693	-0.30894	-0.593809	0.090625	-0.47856	-0.680835
6.26	0.0739824	0.0528387	-0.458616	0.0818965	0.273556	0.174604	0.0456487	-0.0663568	0.0744858	0.156388	0.0507714	0.238113	-0.339577	0.131982	-0.649367	-0.454707	-0.56068	-0.310502	-0.601622	0.0796875	-0.49106	-0.680835
6.27	0.0728887	0.053385	-0.458811	0.0835791	0.278244	0.169917	0.0503362	-0.0788568	0.0791733	0.140763	0.0538964	0.239676	-0.342702	0.138232	-0.649367	-0.45627	-0.557555	-0.310502	-0.606309	0.0953125	-0.508248	-0.67771
6.28	0.0705449	0.0538398	-0.463303	0.0820977	0.282931	0.165229	0.0175237	-0.0804193	0.0729233	0.165763	0.0367089	0.234988	-0.338014	0.147607	-0.64468	-0.439082	-0.565368	-0.310502	-0.618809	0.075	-0.523873	-0.679272
6.29	0.0683574	0.054049	-0.4676	0.0830957	0.278244	0.162104	0.0347112	-0.0835443	0.0682358	0.156388	0.0507714	0.233426	-0.350514	0.133544	-0.652492	-0.439082	-0.570055	-0.312065	-0.610997	0.075	-0.533248	-0.698022
6.3	0.0714824	0.055444	-0.466233	0.0829423	0.281369	0.166792	0.0268987	-0.0804193	0.0729233	0.156388	0.0570214	0.242801	-0.359889	0.150732	-0.655617	-0.442207	-0.570055	-0.312065	-0.620372	0.0765625	-0.520748	-0.685522
6.31	0.0688262	0.057018	-0.468772	0.083887	0.282931	0.169917	0.0284612	-0.0835443	0.0588608	0.151701	0.0570214	0.252176	-0.375514	0.146044	-0.65093	-0.45627	-0.568493	-0.305815	-0.623497	0.0796875	-0.526998	-0.698022
6.32	0.0710137	0.0561397	-0.468772	0.0855085	0.278244	0.165229	0.0487737	-0.0788568	0.0619858	0.162638	0.0663964	0.242801	-0.373952	0.136669	-0.654055	-0.45627	-0.568493	-0.312065	-0.632872	0.0953125	-0.52856	-0.693335
6.33	0.0707012	0.0562646	-0.469553	0.084319	0.273556	0.168354	0.0222112	-0.0913568	0.0604233	0.176701	0.0617089	0.247488	-0.363014	0.150732	-0.655617	-0.45002	-0.571618	-0.326127	-0.621934	0.0921875	-0.54106	-0.682397
6.34	0.0691387	0.0566488	-0.478928	0.0845547	0.273556	0.179292	0.0190862	-0.0976068	0.0619858	0.178263	0.0585839	0.241238	-0.366139	0.142919	-0.66343	-0.45002	-0.577868	-0.335502	-0.635997	0.0828125	-0.558248	-0.693335
6.35	0.0688262	0.0548762	-0.482834	0.0841833	0.271994	0.174604	0.0190862	-0.0897943	0.0510483	0.167326	0.0695214	0.239676	-0.352077	0.136669	-0.661867	-0.457832	-0.570055	-0.341752	-0.645372	0.078125	-0.569185	-0.694897
6.36	0.0714824	0.0565662	-0.485374	0.0845937	0.276681	0.168354	0.0378362	-0.0819818	0.0526108	0.179826	0.0617089	0.253738	-0.369264	0.135107	-0.664992	-0.454707	-0.56068	-0.341752	-0.664122	0.075	-0.575435	-0.69646
6.37	0.0669512	0.0565698	-0.483225	0.0863995	0.282931	0.168354	0.0222112	-0.0804193	0.0526108	0.164201	0.0476464	0.249051	-0.370827	0.133544	-0.661867	-0.460957	-0.559118	-0.341752	-0.675059	0.0921875	-0.562935	-0.69646
6.38	0.0653887	0.0584448	-0.486741	0.0854881	0.281369	0.169917	0.0331487	-0.0851068	0.0526108	0.167326	0.0460839	0.247488	-0.394264	0.135107	-0.658742	-0.460957	-0.565368	-0.343315	-0.671934	0.08125	-0.57231	-0.70271
6.39	0.0661699	0.0594487	-0.487327	0.0857351	0.290744	0.171479	0.0487737	-0.0835443	0.0510483	0.173576	0.0460839	0.234988	-0.406764	0.135107	-0.654055	-0.460957	-0.56068	-0.357377	-0.675059	0.0875	-0.575435	-0.70271
6.4	0.0586699	0.0607052	-0.488694	0.0871344	0.287619	0.160542	-0.00591376	-0.0710443	0.0479233	0.165763	0.0445214	0.241238	-0.423952	0.139794	-0.652492	-0.465645	-0.574743	-0.362065	-0.667247	0.101563	-0.587935	-0.701147
6.41	0.0597637	0.0590057	-0.490256	0.0851368	0.282931	0.160542	0.0190862	-0.0929193	0.0510483	0.182951	0.0320214	0.234988	-0.400514	0.127294	-0.655617	-0.460957	-0.574743	-0.36519	-0.671934	0.084375	-0.586373	-0.691772
6.42	0.0644512	0.0565981	-0.491038	0.0877664	0.281369	0.157417	0.0347112	-0.0913568	0.0557358	0.182951	0.0398339	0.234988	-0.373952	0.122607	-0.664992	-0.451582	-0.574743	-0.369877	-0.679747	0.101563	-0.59106	-0.698022
6.43	0.0621074	0.0567765	-0.495139	0.0860389	0.271994	0.151167	0.0128362	-0.0851068	0.0557358	0.197013	0.0320214	0.234988	-0.377077	0.127294	-0.671242	-0.465645	-0.57318	-0.374565	-0.679747	0.0875	-0.594185	-0.69021
6.44	0.0632012	0.0586746	-0.495334	0.086797	0.273556	0.160542	0.0284612	-0.100732	0.0588608	0.193888	0.0335839	0.239676	-0.392702	0.136669	-0.668117	-0.460957	-0.563805	-0.385502	-0.687559	0.09375	-0.592623	-0.698022
6.45	0.0600762	0.0584441	-0.494163	0.0871786	0.264181	0.166792	0.0378362	-0.0991693	0.0588608	0.172013	0.0304589	0.230301	-0.402077	0.141357	-0.661867	-0.465645	-0.565368	-0.38394	-0.684434	0.0984375	-0.58481	-0.705835
6.46	0.0519512	0.060991	-0.500217	0.0874339	0.268869	0.165229	-0.0387263	-0.0913568	0.0541733	0.172013	0.0382714	0.230301	-0.425514	0.146044	-0.65093	-0.473457	-0.576305	-0.404252	-0.693809	0.101563	-0.601998	-0.70271
6.47	0.0608574	0.0619177	-0.509006	0.0848896	0.276681	0.166792	0.0362737	-0.0991693	0.0557358	0.186076	0.0351464	0.238113	-0.433327	0.146044	-0.664992	-0.48127	-0.571618	-0.40269	-0.704747	0.06875	-0.60981	-0.705835
6.48	0.0597637	0.0613194	-0.497874	0.0859946	0.267306	0.169917	0.0159612	-0.100732	0.0666733	0.178263	0.0445214	0.242801	-0.428639	0.141357	-0.64468	-0.48127	-0.563805	-0.399565	-0.703184	0.0921875	-0.586373	-0.69646
6.49	0.0580449	0.0607948	-0.500803	0.0865864	0.286056	0.173042	-0.0277888	-0.105419	0.0651108	0.178263	0.0460839	0.244363	-0.406764	0.127294	-0.658742	-0.47502	-0.55443	-0.399565	-0.707872	0.0890625	-0.595748	-0.704272
6.5	0.0660137	0.0593938	-0.502756	0.0841535	0.279806	0.165229	0.0456487	-0.0976068	0.0619858	0.189201	0.0460839	0.234988	-0.403639	0.138232	-0.65093	-0.471895	-0.546618	-0.405815	-0.703184	0.06875	-0.605123	-0.707397
6.51	0.0613262	0.0602248	-0.501584	0.0868433	0.287619	0.157417	-0.00435127	-0.0866693	0.0541733	0.179826	0.0445214	0.238113	-0.409889	0.152294	-0.655617	-0.471895	-0.557555	-0.398002	-0.707872	0.090625	-0.61606	-0.69646
6.52	0.0614824	0.0612382	-0.503147	0.0863438	0.289181	0.165229	0.0362737	-0.100732	0.0479233	0.184513	0.0398339	0.239676	-0.420827	0.133544	-0.647805	-0.47502	-0.555993	-0.401127	-0.709434	0.0859375	-0.62231	-0.699585
6.53	0.0625762	0.062219	-0.505881	0.08666	0.289181	0.166792	0.0331487	-0.0882318	0.0401108	0.186076	0.0382714	0.234988	-0.433327	0.158544	-0.65093	-0.48127	-0.563805	-0.399565	-0.707872	0.084375	-0.612935	-0.71521
6.54	0.0582012	0.0618273	-0.507639	0.0865566	0.281369	0.171479	0.0206487	-0.0851068	0.0401108	0.192326	0.0273339	0.234988	-0.433327	0.131982	-0.655617	-0.49377	-0.57318	-0.40894	-0.701622	0.0875	-0.600435	-0.71521
6.55	0.0574199	0.0604195	-0.508616	0.0876285	0.279806	0.165229	0.0378362	-0.0960443	0.0463608	0.170451	0.0273339	0.230301	-0.422389	0.135107	-0.65718	-0.49377	-0.559118	-0.41519	-0.701622	0.09375	-0.608248	-0.72771
6.56	0.0602324	0.0595286	-0.507444	0.0858069	0.276681	0.180854	0.0159612	-0.0835443	0.0479233	0.182951	0.0367089	0.224051	-0.411452	0.131982	-0.65718	-0.490645	-0.55443	-0.419877	-0.700059	0.084375	-0.614498	-0.707397
6.57	0.0603887	0.0602787	-0.507053	0.0900056	0.284494	0.180854	0.0253362	-0.103857	0.0479233	0.186076	0.0351464	0.216238	-0.411452	0.142919	-0.661867	-0.482832	-0.538805	-0.423002	-0.717247	0.1125	-0.633248	-0.712085
6.58	0.0605449	0.0603668	-0.507834	0.0861313	0.281369	0.173042	0.0315862	-0.0976068	0.0557358	0.184513	0.0351464	0.224051	-0.417702	0.135107	-0.647805	-0.478145	-0.532555	-0.418315	-0.720372	0.078125	-0.630123	-0.713647
6.59	0.0549199	0.0631	-0.503538	0.0884723	0.276681	0.171479	-0.00435127	-0.100732	0.0572983	0.179826	0.0257714	0.234988	-0.444264	0.152294	-0.654055	-0.473457	-0.530993	-0.418315	-0.717247	0.101563	-0.625435	-0.710522
6.6	0.0574199	0.0620024	-0.500217	0.0907187	0.273556	0.168354	0.00502374	-0.0913568	0.0619858	0.189201	0.0320214	0.228738	-0.438014	0.144482	-0.647805	-0.478145	-0.540368	-0.424565	-0.712559	0.128125	-0.617623	-0.70896
6.61	0.0586699	0.0623739	-0.505881	0.0870954	0.270431	0.177729	0.0347112	-0.0882318	0.0494858	0.190763	0.0320214	0.228738	-0.445827	0.136669	-0.635305	-0.482832	-0.545055	-0.437065	-0.720372	0.096875	-0.61606	-0.707397
6.62	0.0513262	0.0626712	-0.508225	0.0872724	0.265744	0.183979	-0.00122627	-0.111669	0.0557358	0.173576	0.0257714	0.236551	-0.442702	0.127294	-0.633742	-0.489082	-0.538805	-0.444877	-0.726622	0.096875	-0.62231	-0.707397
6.63	0.0589824	0.0616934	-0.512913	0.0887268	0.265744	0.185542	0.0456487	-0.0976068	0.0572983	0.167326	0.0398339	0.227176	-0.441139	0.139794	-0.643117	-0.485957	-0.537243	-0.448002	-0.725059	0.1	-0.639498	-0.724585
6.64	0.0567949	0.0639398	-0.516428	0.0884352	0.271994	0.177729	0.0284612	-0.111669	0.0494858	0.167326	0.0335839	0.259988	-0.450514	0.141357	-0.652492	-0.489082	-0.52943	-0.44019	-0.734434	0.0890625	-0.650435	-0.724585
6.65	0.0533574	0.0637772	-0.512327	0.0911356	0.273556	0.174604	0.00189873	-0.105419	0.0510483	0.178263	0.0226464	0.247488	-0.450514	0.139794	-0.66968	-0.479707	-0.530993	-0.437065	-0.737559	0.1125	-0.63481	-0.72146
6.66	0.0557012	0.0633069	-0.510959	0.0895518	0.273556	0.162104	0.0378362	-0.111669	0.0479233	0.181388	0.0288964	0.241238	-0.448952	0.144482	-0.660305	-0.473457	-0.537243	-0.441752	-0.729747	0.104687	-0.633248	-0.716772
6.67	0.0533574	0.0651215	-0.513499	0.0894488	0.278244	0.176167	0.000336235	-0.114794	0.0541733	0.195451	0.0179589	0.244363	-0.458327	0.139794	-0.658742	-0.484395	-0.53568	-0.444877	-0.729747	0.103125	-0.637935	-0.719897
6.68	0.0564824	0.0640402	-0.511545	0.0906737	0.275119	0.171479	0.0597112	-0.117919	0.0447983	0.187638	0.0195214	0.236551	-0.453639	0.141357	-0.643117	-0.478145	-0.53568	-0.44644	-0.731309	0.1125	-0.63481	-0.735522
6.69	0.0503887	0.0631746	-0.517014	0.0891202	0.267306	0.171479	0.00346123	-0.108544	0.0416733	0.187638	0.0163964	0.227176	-0.448952	0.146044	-0.635305	-0.48752	-0.527868	-0.448002	-0.746934	0.0921875	-0.64731	-0.735522
6.7	0.0474199	0.0639037	-0.514866	0.0892154	0.270431	0.176167	-0.00591376	-0.105419	0.0432358	0.173576	0.0117089	0.225613	-0.459889	0.144482	-0.622805	-0.484395	-0.521618	-0.449565	-0.750059	0.09375	-0.64731	-0.737085
6.71	0.0538262	0.06369	-0.516819	0.0908684	0.261056	0.173042	0.0393987	-0.0991693	0.0619858	0.167326	0.0226464	0.233426	-0.466139	0.144482	-0.641555	-0.49377	-0.520055	-0.45269	-0.750059	0.107813	-0.658248	-0.726147
6.72	0.0474199	0.0647819	-0.521116	0.0881976	0.271994	0.173042	-0.0215388	-0.0991693	0.0526108	0.181388	0.0242089	0.227176	-0.470827	0.135107	-0.646242	-0.498457	-0.524743	-0.451127	-0.753184	0.0828125	-0.658248	-0.719897
6.73	0.0522637	0.0647993	-0.517795	0.0883433	0.275119	0.173042	0.0518987	-0.110107	0.0479233	0.186076	0.00702136	0.227176	-0.469264	0.133544	-0.639992	-0.49377	-0.524743	-0.45894	-0.751622	0.090625	-0.651998	-0.712085
6.74	0.0486699	0.0649639	-0.516038	0.0904736	0.270431	0.182417	0.0237737	-0.121044	0.0588608	0.181388	0.0195214	0.211551	-0.473952	0.133544	-0.63218	-0.498457	-0.52943	-0.463627	-0.745372	0.1125	-0.655123	-0.716772
6.75	0.0497637	0.0647898	-0.513499	0.088972	0.268869	0.179292	0.00814873	-0.110107	0.0557358	0.176701	0.0210839	0.225613	-0.470827	0.142919	-0.61968	-0.48752	-0.527868	-0.45894	-0.742247	0.101563	-0.664498	-0.70896
6.76	0.0530449	0.0643907	-0.515842	0.0884649	0.262619	0.188667	0.0315862	-0.105419	0.0572983	0.187638	0.0210839	0.219363	-0.469264	0.136669	-0.604055	-0.485957	-0.527868	-0.460502	-0.745372	0.0921875	-0.680123	-0.71521
6.77	0.0472637	0.0652002	-0.514084	0.0916527	0.273556	0.183979	0.00189873	-0.111669	0.0510483	0.176701	0.0257714	0.225613	-0.475514	0.121044	-0.611867	-0.490645	-0.518493	-0.454252	-0.753184	0.115625	-0.675435	-0.724585
6.78	0.0461699	0.0658029	-0.518772	0.0908839	0.278244	0.177729	0.0159612	-0.102294	0.0541733	0.167326	0.0148339	0.227176	-0.488014	0.116357	-0.622805	-0.492207	-0.501305	-0.462065	-0.765684	0.1	-0.67231	-0.73396
6.79	0.0461699	0.065463	-0.520725	0.0910211	0.270431	0.171479	0.0159612	-0.114794	0.0541733	0.159513	0.0320214	0.230301	-0.484889	0.127294	-0.635305	-0.50002	-0.509118	-0.457377	-0.759434	0.101563	-0.67231	-0.73396
6.8	0.0441387	0.0655644	-0.52092	0.091161	0.264181	0.169917	0.00346123	-0.111669	0.0588608	0.176701	0.0226464	0.231863	-0.486452	0.111669	-0.643117	-0.507832	-0.501305	-0.45894	-0.764122	0.103125	-0.669185	-0.726147
6.81	0.0439824	0.0652496	-0.513108	0.0909591	0.257931	0.171479	0.0128362	-0.130419	0.0604233	0.178263	0.0304589	0.222488	-0.481764	0.117919	-0.627492	-0.495332	-0.507555	-0.451127	-0.764122	0.110938	-0.66606	-0.704272
6.82	0.0424199	0.0645573	-0.518577	0.0937291	0.253244	0.174604	-0.00591376	-0.119482	0.0510483	0.176701	0.0210839	0.222488	-0.475514	0.125732	-0.624367	-0.495332	-0.518493	-0.455815	-0.768809	0.125	-0.700435	-0.710522
6.83	0.0497637	0.0655445	-0.516233	0.0936802	0.262619	0.183979	0.0487737	-0.125732	0.0572983	0.181388	0.0226464	0.217801	-0.481764	0.130419	-0.611867	-0.485957	-0.518493	-0.448002	-0.779747	0.121875	-0.701998	-0.705835
6.84	0.0507012	0.0652607	-0.519944	0.0901386	0.275119	0.177729	0.0143987	-0.108544	0.0479233	0.176701	0.0367089	0.224051	-0.477077	0.139794	-0.610305	-0.490645	-0.51068	-0.454252	-0.775059	0.090625	-0.687935	-0.72146
6.85	0.0450762	0.0663355	-0.512522	0.0915026	0.273556	0.174604	-0.0121638	-0.121044	0.0557358	0.178263	0.0257714	0.227176	-0.484889	0.133544	-0.597805	-0.489082	-0.509118	-0.451127	-0.771934	0.110938	-0.673873	-0.718335
6.86	0.0482012	0.0664396	-0.517209	0.091823	0.262619	0.171479	0.0300237	-0.110107	0.0541733	0.173576	0.0195214	0.238113	-0.494264	0.136669	-0.616555	-0.496895	-0.507555	-0.45269	-0.781309	0.107813	-0.669185	-0.72146
6.87	0.0447637	0.0664599	-0.518772	0.0913094	0.254806	0.185542	-0.00122627	-0.114794	0.0447983	0.179826	0.0210839	0.234988	-0.491139	0.133544	-0.610305	-0.492207	-0.505993	-0.448002	-0.776622	0.0984375	-0.69106	-0.724585
6.88	0.0432012	0.0658814	-0.517014	0.0948692	0.251681	0.173042	0.0206487	-0.117919	0.0401108	0.176701	0.0101464	0.233426	-0.489577	0.133544	-0.622805	-0.492207	-0.515368	-0.444877	-0.779747	0.129688	-0.68481	-0.726147
6.89	0.0441387	0.0650227	-0.518381	0.0948838	0.248556	0.177729	0.0128362	-0.102294	0.0369858	0.176701	0.0148339	0.239676	-0.483327	0.119482	-0.614992	-0.50002	-0.51068	-0.448002	-0.779747	0.128125	-0.686373	-0.735522
6.9	0.0424199	0.0653569	-0.517405	0.0933402	0.245431	0.177729	-0.00122627	-0.111669	0.0338608	0.187638	0.0117089	0.238113	-0.481764	0.124169	-0.611867	-0.50002	-0.51693	-0.449565	-0.776622	0.120313	-0.673873	-0.730835
6.91	0.0436699	0.0656826	-0.516819	0.0940517	0.246994	0.168354	0.00658623	-0.110107	0.0447983	0.206388	0.000771365	0.238113	-0.483327	0.117919	-0.596242	-0.517207	-0.521618	-0.449565	-0.778184	0.129688	-0.673873	-0.72771
6.92	0.0410137	0.0655993	-0.514866	0.0920985	0.239181	0.171479	-0.00122627	-0.117919	0.0432358	0.186076	-0.00235364	0.242801	-0.483327	0.131982	-0.58843	-0.51252	-0.524743	-0.44644	-0.768809	0.117188	-0.66606	-0.729272
6.93	0.0405449	0.0657755	-0.511741	0.0925531	0.240744	0.166792	0.0175237	-0.113232	0.0369858	0.190763	-0.00391614	0.234988	-0.491139	0.125732	-0.572805	-0.51252	-0.530993	-0.444877	-0.760997	0.125	-0.662935	-0.73396
6.94	0.0435137	0.0654774	-0.51428	0.0930369	0.239181	0.155854	0.0440862	-0.108544	0.0447983	0.186076	0.00858386	0.228738	-0.495827	0.131982	-0.59468	-0.510957	-0.51693	-0.441752	-0.768809	0.121875	-0.664498	-0.738647
6.95	0.0380449	0.0664943	-0.515452	0.0899522	0.240744	0.162104	-0.0137263	-0.119482	0.0385483	0.186076	0.0148339	0.239676	-0.497389	0.128857	-0.60093	-0.501582	-0.513805	-0.44019	-0.759434	0.0953125	-0.662935	-0.74021
6.96	0.0428887	0.0664697	-0.511545	0.0944917	0.250119	0.171479	0.0175237	-0.110107	0.0432358	0.186076	0.00702136	0.238113	-0.497389	0.122607	-0.618117	-0.504707	-0.51068	-0.44019	-0.759434	0.1375	-0.662935	-0.73396
6.97	0.0453887	0.0656348	-0.511741	0.0958351	0.256369	0.173042	0.0347112	-0.116357	0.0416733	0.178263	0.0195214	0.231863	-0.488014	0.122607	-0.602492	-0.496895	-0.518493	-0.437065	-0.759434	0.14375	-0.673873	-0.749585
6.98	0.0425762	0.0665396	-0.510569	0.0917491	0.254806	0.177729	-0.00122627	-0.117919	0.0432358	0.182951	0.00389636	0.231863	-0.491139	0.141357	-0.58843	-0.484395	-0.51693	-0.438627	-0.764122	0.1125	-0.681685	-0.723022
6.99	0.0428887	0.0663699	-0.506663	0.0924267	0.250119	0.168354	0.0268987	-0.127294	0.0401108	0.187638	0.00389636	0.231863	-0.491139	0.138232	-0.585305	-0.479707	-0.51068	-0.435502	-0.762559	0.120313	-0.67231	-0.72771
7	0.0433574	0.0659653	-0.509202	0.0913733	0.236056	0.176167	0.0206487	-0.114794	0.0447983	0.175138	0.0195214	0.238113	-0.495827	0.133544	-0.60093	-0.479707	-0.507555	-0.44019	-0.765684	0.110938	-0.675435	-0.71521
7.01	0.0433574	0.0648874	-0.507444	0.0917746	0.237619	0.165229	0.0300237	-0.113232	0.0432358	0.173576	0.0179589	0.239676	-0.486452	0.125732	-0.58843	-0.476582	-0.512243	-0.429252	-0.771934	0.110938	-0.664498	-0.72771
7.02	0.0419512	0.0660432	-0.509788	0.0933351	0.229806	0.183979	0.0409612	-0.127294	0.0416733	0.173576	0.0242089	0.230301	-0.498952	0.121044	-0.58843	-0.467207	-0.51693	-0.435502	-0.778184	0.117188	-0.66606	-0.743335
7.03	0.0407012	0.0658318	-0.505881	0.0904989	0.228244	0.179292	0.0347112	-0.121044	0.0401108	0.159513	0.0117089	0.249051	-0.495827	0.121044	-0.571242	-0.464082	-0.52318	-0.435502	-0.767247	0.103125	-0.658248	-0.730835
7.04	0.0439824	0.066892	-0.507053	0.0913198	0.237619	0.179292	0.0362737	-0.114794	0.0432358	0.179826	0.00858386	0.241238	-0.503639	0.131982	-0.579055	-0.471895	-0.502868	-0.44019	-0.764122	0.107813	-0.67231	-0.73396

## Sheet: Fig_1E
Figure 1E
	CAP amplitude (µV); average				CAP amplitude (µV); individual data
Stimulation current	Plpwt/y		Plpnull/y		Plpwt/y										Plpnull/y
(mA)	mean	SEM	mean	SEM	n = 1	n = 2	n = 3	n = 4	n = 5	n = 6	n = 7	n = 8	n = 9	n = 10	n = 1	n = 2	n = 3	n = 4	n = 5	n = 6	n = 7	n = 8
0	-0.0282812	0.0280228	-0.102539	0.0329111	0.059375	0.071875	-0.0390625	-0.09375	-0.221875	-0.06875	-0.0484375	-0.0015625	-0.0390625	0.0984375	-0.0328125	-0.15	-0.189063	-0.03125	-0.0390625	-0.071875	-0.29375	-0.0125
0.1	0.0784375	0.0167017	0.0640625	0.0396989	0.084375	0.129687	0.071875	0.117188	0.0265625	0.0640625	0.171875	0.0765625	0.0734375	-0.03125	0.0859375	0.103125	-0.121875	0.096875	-0.084375	0.1875	0.220312	0.025
0.2	0.660469	0.227747	0.407227	0.159259	1.73438	0.154688	0.35625	0.846875	1.7125	0.0703125	0.0375	0.00625	0.0328125	1.65312	1.25938	0.103125	0.945313	0.0078125	0.125	0.64375	0.171875	0.0015625
0.3	7.61281	0.845978	4.26777	1.08683	11.0797	2.26094	7.56875	9.47031	11.8813	6.42656	6.77031	6.92344	5.20781	8.53906	6.39375	1.55469	11.1641	3.59531	1.21563	4.7375	1.87344	3.60781
0.4	9.93781	0.764764	6.48477	1.15988	12.2922	3.50781	10.1469	11.0875	13.0141	9.82344	10.0078	10.3078	9.15937	10.0312	8.30469	3.2875	14.0172	6.57812	3.39844	6.50781	4.11094	5.67344
0.5	10.7567	0.770971	7.29941	1.19743	12.575	3.92188	11.1781	11.7109	13.5687	10.7313	10.8984	11.2172	10.6016	11.1641	8.55937	4.01719	15.3922	7.4625	4.55781	6.82031	4.89844	6.6875
0.6	11.2294	0.793694	7.62148	1.18544	12.6828	4.04844	11.9344	11.8594	13.9625	11.3281	11.3578	11.8953	11.3047	11.9203	8.58125	4.50781	15.7453	7.90625	5.10938	6.79375	5.16406	7.16406
0.7	11.568	0.805932	7.9582	1.2071	12.9031	4.21719	12.1641	12.1266	14.2031	11.7219	11.7922	12.4359	11.7281	12.3875	8.90469	4.87969	16.2578	8.175	5.60781	7.15469	5.21094	7.475
0.8	11.8512	0.814429	8.05215	1.16832	13.2797	4.39531	12.3469	12.2469	14.3594	12.0312	12.0687	12.8406	12.175	12.7688	8.99375	5.11875	16.0859	8.25312	5.85312	7.13125	5.32344	7.65781
0.9	12.078	0.824339	8.22324	1.16425	13.6359	4.53281	12.7313	12.3625	14.4453	12.2141	12.1578	13.2547	12.3734	13.0719	8.98281	5.22344	16.2859	8.35312	6.11094	7.46094	5.59531	7.77344
1	12.2039	0.831569	8.27891	1.17522	13.6312	4.57812	12.8875	12.4188	14.4641	12.1609	12.3312	13.5266	12.675	13.3656	8.97344	5.34375	16.3922	8.51875	6.26875	7.40781	5.36094	7.96562

## Sheet: Fig_1F
Figure 1F
	CAP amplitude normalized; average				CAP amplitude (µV); individual data
Stimulation current	Plpwt/y		Plpnull/y		Plpwt/y										Plpnull/y
(mA)	mean	SEM	mean	SEM	n = 1	n = 2	n = 3	n = 4	n = 5	n = 6	n = 7	n = 8	n = 9	n = 10	n = 1	n = 2	n = 3	n = 4	n = 5	n = 6	n = 7	n = 8
0	-0.00112782	0.00257946	-0.0149033	0.00600623	0.0043558	0.0156997	-0.00303104	-0.00754907	-0.0153397	-0.00565335	-0.00392803	-0.000115513	-0.00308185	0.00736498	-0.00365663	-0.0280702	-0.0115337	-0.00366838	-0.00623131	-0.00970259	-0.0547945	-0.00156924
0.1	0.00796894	0.00249469	0.0111123	0.00583821	0.00618982	0.0283276	0.00557711	0.00943634	0.00183645	0.00526789	0.0139382	0.00566016	0.00579389	-0.00233809	0.00957688	0.0192982	-0.00743494	0.011372	-0.0134596	0.0253111	0.0410959	0.00313849
0.2	0.0510815	0.0161298	0.0446659	0.016014	0.127235	0.0337884	0.0276431	0.0681933	0.118397	0.00578183	0.00304105	0.000462054	0.00258876	0.123685	0.140345	0.0192982	0.0576685	0.000917095	0.0199402	0.0869015	0.0320606	0.000196155
0.3	0.611707	0.0428464	0.467799	0.0634267	0.812815	0.493857	0.587294	0.762582	0.821432	0.528459	0.549037	0.51184	0.410873	0.638882	0.71252	0.290936	0.68106	0.422047	0.193918	0.639528	0.349461	0.452923
0.4	0.810244	0.0198091	0.758461	0.0435469	0.901765	0.766212	0.787342	0.892803	0.899752	0.807786	0.811581	0.762042	0.722633	0.750526	0.925475	0.615205	0.855114	0.772194	0.542124	0.878507	0.766832	0.71224
0.5	0.879485	0.0127859	0.865206	0.0283574	0.922513	0.856655	0.867362	0.943004	0.938101	0.882436	0.883806	0.829271	0.836415	0.835282	0.953857	0.751754	0.938995	0.876009	0.727069	0.920692	0.913728	0.839545
0.6	0.917678	0.00894742	0.910414	0.0183086	0.930422	0.8843	0.926043	0.954957	0.965324	0.931517	0.921059	0.879404	0.891889	0.891863	0.956295	0.843567	0.960538	0.9281	0.815055	0.917106	0.963276	0.899372
0.7	0.946171	0.00691012	0.953471	0.0117505	0.946584	0.92116	0.943865	0.976472	0.98196	0.963896	0.956285	0.919372	0.925296	0.926818	0.992339	0.913158	0.991802	0.959648	0.894566	0.96583	0.97202	0.938407
0.8	0.970448	0.00471085	0.970128	0.00717232	0.974209	0.960068	0.95805	0.98616	0.992762	0.989336	0.978713	0.94929	0.960552	0.955343	1.00226	0.957895	0.981317	0.968819	0.933699	0.962666	0.993005	0.961357
0.9	0.989693	0.0029579	0.994274	0.00775041	1.00034	0.990102	0.987876	0.995471	0.998704	1.00437	0.985935	0.979901	0.976208	0.978022	1.00104	0.977485	0.993518	0.980558	0.974826	1.00717	1.04372	0.975873
1	1	0	1	0	1	1	1	1	1	1	1	1	1	1	1	1	1	1	1	1	1	1

## Sheet: Fig_2A
Figure 2A
	Baseline Intensity F/C
	Plpwt/y	Plpnull/y
n = 1	2.32452	2.67604
n = 2	2.52894	1.34184
n = 3	2.08781	2.25624
n = 4	2.00884	2.6954
n = 5	2.77116	1.68351
n = 6	2.50563	1.63239
n = 7	2.72706	2.6259
n = 8	2.65118	1.56967
n = 9	2.40149
n = 10	2.20241

## Sheet: Fig_2B
Figure 2B
	Log photons (a.u.); average				Log photons (a.u.); individual data
	Plpwt/y		Plpnull/y		Plpwt/y									Plpnull/y
time (ns)	mean	SEM	mean	SEM	n = 1	n = 2	n = 3	n = 4	n = 5	n = 6	n = 7	n = 8	n = 9	n = 1	n = 2	n = 3	n = 4	n = 5	n = 6	n = 7	n = 8	n = 9	n = 10
0.10974	0.137425	0.0399873	0.153575	0.0598569	0.0758336	0.0734509	0.00674921	0.0086637	0.345074	0.0412246	0.187892	0.185042	0.312893	0.0409889	0.00823261	0.0320231	0.038381	0.0207302	0.0382717	0.372489	0.0383521	0.468077	0.478208
0.21948	0.549918	0.105267	0.446844	0.140716	0.613516	0.589845	0.0110423	0.0116039	0.930098	0.466328	0.74435	0.736627	0.845854	0.993154	0.00928864	0.0327945	0.0396765	0.0211287	0.0395118	0.941987	0.438403	0.971187	0.981309
0.32922	1	0	0.998643	0.000630941	1	1	1	1	1	1	1	1	1	0.994724	0.998991	1	1	0.997546	1	1	0.995168	1	1
0.43896	0.886004	0.00746509	0.929557	0.016252	0.857286	0.905139	0.916063	0.895076	0.868799	0.920284	0.860878	0.876619	0.873891	0.907504	0.994345	0.979385	0.927663	0.991913	0.928095	0.87153	0.976128	0.860414	0.858597
0.5487	0.737927	0.00952117	0.810782	0.0184449	0.698626	0.761059	0.792021	0.75396	0.734539	0.751131	0.698722	0.720383	0.730899	0.798879	0.901194	0.873932	0.796217	0.890851	0.796543	0.739937	0.827241	0.73982	0.743211
0.65844	0.624101	0.00941183	0.699857	0.0167695	0.582059	0.641125	0.682877	0.636697	0.624506	0.627775	0.587735	0.611174	0.622961	0.711302	0.790924	0.752816	0.676443	0.769189	0.676894	0.631447	0.70207	0.640016	0.647468
0.76818	0.539659	0.0100183	0.617013	0.0158187	0.49325	0.546559	0.605537	0.556967	0.545909	0.535725	0.506677	0.527596	0.538712	0.643639	0.706473	0.663841	0.593685	0.678234	0.593984	0.553872	0.602789	0.561111	0.5725
0.87792	0.475466	0.010156	0.552299	0.014488	0.430394	0.478724	0.543332	0.495363	0.482533	0.470397	0.442738	0.462938	0.472773	0.583366	0.637215	0.591672	0.531497	0.60321	0.531345	0.490437	0.532984	0.502631	0.518633
0.98766	0.423592	0.00968015	0.497092	0.013431	0.37982	0.424536	0.488809	0.441886	0.430173	0.418139	0.39333	0.413964	0.421671	0.537925	0.574798	0.529237	0.476743	0.539621	0.477058	0.438596	0.475213	0.452181	0.46955
1.0974	0.381622	0.00983277	0.454388	0.0133338	0.338394	0.379085	0.448679	0.402829	0.387643	0.374674	0.353096	0.371449	0.378753	0.498614	0.530005	0.486764	0.437816	0.493479	0.437569	0.395524	0.427252	0.408837	0.42802
1.20714	0.346675	0.00970789	0.418005	0.012346	0.304783	0.342765	0.412745	0.368668	0.353738	0.338948	0.318643	0.336203	0.343583	0.461851	0.487319	0.44757	0.4022	0.451807	0.402288	0.361824	0.387898	0.378267	0.399023
1.31688	0.31871	0.00889254	0.38664	0.0114154	0.279258	0.314258	0.379292	0.336876	0.325215	0.311019	0.293013	0.310532	0.318928	0.432836	0.448813	0.411944	0.371505	0.414382	0.371841	0.332929	0.356641	0.351623	0.373889
1.42662	0.295121	0.00840333	0.358725	0.0107564	0.257186	0.289942	0.352349	0.311832	0.30119	0.286499	0.272181	0.287555	0.297357	0.401241	0.417901	0.382256	0.346059	0.384686	0.346202	0.308202	0.329254	0.32485	0.3466
1.53636	0.272826	0.00782691	0.332855	0.0100645	0.237608	0.267989	0.326341	0.288319	0.277339	0.265794	0.251185	0.265692	0.275168	0.376088	0.386397	0.353789	0.32055	0.355148	0.320658	0.283727	0.305477	0.302525	0.324188
1.6461	0.252098	0.00736273	0.309464	0.00949221	0.217871	0.24712	0.302819	0.266092	0.254195	0.245108	0.233737	0.246884	0.255053	0.351487	0.358428	0.328638	0.298643	0.328785	0.298625	0.260311	0.281995	0.283518	0.304208
1.75584	0.23369	0.00713358	0.289308	0.00895094	0.200223	0.22666	0.282532	0.248129	0.237086	0.225049	0.21809	0.229044	0.236399	0.329211	0.334598	0.306275	0.279963	0.307638	0.280217	0.243389	0.259559	0.265321	0.286908
1.86558	0.217975	0.00675853	0.271762	0.00857306	0.187015	0.21137	0.264399	0.231789	0.222464	0.210382	0.202125	0.213302	0.218926	0.312404	0.313776	0.288224	0.263093	0.287472	0.262934	0.228274	0.242763	0.248825	0.269853
1.97532	0.203842	0.00639796	0.255034	0.00847882	0.175371	0.198404	0.248337	0.217198	0.207017	0.197418	0.188275	0.198988	0.203573	0.29774	0.294664	0.271074	0.248361	0.269935	0.248309	0.212198	0.227882	0.229924	0.250253
2.08506	0.190405	0.00631206	0.24016	0.00821461	0.163013	0.18474	0.234109	0.204293	0.195018	0.183904	0.174841	0.184516	0.189208	0.281481	0.277652	0.256833	0.235291	0.254339	0.23552	0.200064	0.212653	0.213479	0.234288
2.1948	0.178369	0.00604093	0.226776	0.00768102	0.153351	0.174023	0.220157	0.192171	0.183242	0.173075	0.161872	0.171826	0.1756	0.264506	0.261503	0.242332	0.223876	0.239538	0.223839	0.188124	0.200526	0.201408	0.222107
2.30454	0.167161	0.00551055	0.213122	0.00724524	0.144533	0.164286	0.20543	0.179183	0.17138	0.163193	0.15142	0.160809	0.164219	0.25087	0.243963	0.227715	0.209625	0.224181	0.209834	0.175957	0.18926	0.189537	0.210274
2.41428	0.156865	0.00529468	0.200963	0.00699292	0.135487	0.154003	0.194058	0.168829	0.159786	0.152589	0.142491	0.150969	0.15357	0.236727	0.229116	0.215947	0.198694	0.212223	0.198822	0.163926	0.176949	0.178516	0.198706
2.52402	0.14687	0.00501333	0.189394	0.00661525	0.126226	0.143632	0.181856	0.158475	0.14982	0.142415	0.133451	0.142111	0.143846	0.222954	0.215095	0.20323	0.188736	0.199187	0.188773	0.153741	0.165312	0.16819	0.188717
2.63376	0.137877	0.00460105	0.178165	0.00643373	0.118253	0.134647	0.170108	0.147961	0.13994	0.133528	0.126024	0.134566	0.135868	0.213625	0.200616	0.190944	0.177919	0.186372	0.177867	0.143495	0.155029	0.157924	0.177856
2.7435	0.130092	0.00455807	0.169576	0.00636416	0.110713	0.126055	0.162012	0.140969	0.130853	0.124626	0.119365	0.12763	0.128602	0.203238	0.190437	0.182621	0.171226	0.178007	0.171226	0.134246	0.144741	0.150334	0.169687
2.85324	0.122717	0.00441635	0.161165	0.00613235	0.10383	0.118316	0.153512	0.133471	0.123986	0.116772	0.112963	0.12039	0.121213	0.194585	0.179685	0.173833	0.162254	0.168207	0.162267	0.127319	0.135624	0.144299	0.163579
2.96298	0.116625	0.00425661	0.153997	0.00601821	0.0986884	0.11252	0.146525	0.126732	0.117052	0.110642	0.107027	0.114585	0.115853	0.186754	0.170736	0.165825	0.155678	0.161175	0.155731	0.120265	0.12855	0.137508	0.15775
3.07272	0.111612	0.00418448	0.148042	0.00589626	0.0936993	0.106736	0.140634	0.121987	0.112579	0.104932	0.103019	0.109547	0.111372	0.178623	0.16363	0.160118	0.151624	0.155279	0.151501	0.11508	0.121482	0.131569	0.151519
3.18246	0.107354	0.00379376	0.141715	0.00567128	0.0906451	0.103765	0.133764	0.115784	0.108293	0.101039	0.0994714	0.105853	0.107571	0.172268	0.155177	0.153374	0.144865	0.148357	0.144782	0.110034	0.116574	0.125912	0.145807
3.2922	0.102789	0.00341904	0.135258	0.00549423	0.0873075	0.0994991	0.126611	0.10984	0.102914	0.0970261	0.0960297	0.102617	0.103257	0.16501	0.14752	0.146307	0.138652	0.140803	0.138561	0.10365	0.111409	0.120548	0.140123
3.40194	0.0976494	0.00330296	0.129542	0.0053751	0.082947	0.0940651	0.120706	0.104683	0.0979857	0.0919667	0.0912345	0.0975426	0.0977135	0.158129	0.140612	0.140687	0.133563	0.134881	0.133564	0.0987829	0.105283	0.115273	0.13465
3.51168	0.0924303	0.00309396	0.123958	0.00524331	0.0789537	0.0896825	0.114177	0.0992888	0.0928185	0.0876765	0.0859204	0.0916979	0.0916579	0.151844	0.133337	0.134956	0.12797	0.128438	0.128083	0.0933569	0.100443	0.110646	0.130509
3.62142	0.0873788	0.0029323	0.118038	0.00516853	0.07472	0.0851522	0.107979	0.0940197	0.0870202	0.0827132	0.081024	0.0870101	0.0867708	0.146051	0.126019	0.128244	0.122893	0.122459	0.122949	0.0878493	0.0949685	0.10492	0.12403
3.73116	0.082891	0.00299358	0.113464	0.00517506	0.0701342	0.0796966	0.103723	0.0903918	0.0827298	0.0775157	0.0771344	0.0825153	0.0821778	0.140973	0.120518	0.124316	0.119063	0.118235	0.119183	0.0837918	0.0893212	0.100288	0.118952
3.8409	0.0788908	0.00284247	0.109203	0.00512507	0.0667917	0.0762985	0.098654	0.0859333	0.0794611	0.073952	0.0730067	0.0781723	0.0777476	0.137042	0.115306	0.119833	0.115551	0.112506	0.115382	0.0803242	0.0852525	0.0960446	0.114791
3.95064	0.0750965	0.00269951	0.104974	0.00500536	0.0643005	0.0731463	0.0939018	0.0822533	0.0757926	0.0709616	0.0686151	0.0735847	0.0733123	0.131752	0.109662	0.115721	0.111437	0.108345	0.111417	0.0764707	0.0817275	0.0921018	0.11111
4.06038	0.0714479	0.00268825	0.101033	0.00498173	0.061192	0.0697044	0.0902897	0.0786861	0.0721945	0.0677905	0.0646679	0.0695669	0.0689391	0.127098	0.104851	0.111281	0.108998	0.103981	0.108835	0.0727205	0.0778801	0.0877283	0.106958
4.17012	0.067919	0.00255755	0.0969086	0.00486498	0.0585035	0.0667685	0.0858069	0.0749692	0.0686791	0.0643448	0.0612143	0.0657007	0.0652843	0.12222	0.099922	0.107442	0.104878	0.0996502	0.104791	0.06948	0.0740249	0.0840796	0.102599
4.27986	0.064588	0.00236787	0.0927135	0.00475021	0.0555562	0.0639758	0.0811048	0.0709535	0.0648751	0.0612611	0.058265	0.0629978	0.0623029	0.116888	0.0945979	0.102901	0.101128	0.0946141	0.101099	0.0656634	0.0705911	0.0802819	0.0993703
4.3896	0.0615493	0.00225745	0.0888623	0.00470085	0.0527188	0.060129	0.0772706	0.0677091	0.0617506	0.0578721	0.0560167	0.0604296	0.0600468	0.113127	0.0896769	0.0986464	0.0972208	0.090645	0.0971859	0.0620849	0.0667193	0.0775686	0.0957483
4.49934	0.058512	0.0021321	0.0850434	0.00457923	0.050161	0.0572482	0.0732689	0.0645812	0.0583688	0.0549358	0.053355	0.0576138	0.0570753	0.107883	0.0851179	0.0948881	0.0934317	0.0864227	0.0932538	0.0587964	0.0631342	0.0746314	0.0928749
4.60908	0.0554657	0.00203027	0.0817298	0.00459073	0.0472871	0.0540922	0.0694702	0.061213	0.0551867	0.0518709	0.0508456	0.0548841	0.0543413	0.104604	0.0808108	0.091346	0.0908522	0.0827402	0.0906937	0.055646	0.0598149	0.0713904	0.0894004
4.71882	0.0529405	0.00195443	0.0787007	0.00457575	0.0449757	0.0514585	0.0664037	0.0583517	0.0529765	0.0491775	0.0487567	0.0526368	0.0517277	0.101332	0.0764758	0.0883669	0.0882714	0.0796403	0.0881732	0.0534378	0.0564636	0.0683394	0.0865066
4.82856	0.0506083	0.00183269	0.0760997	0.00448511	0.0433016	0.0492087	0.0631827	0.0559121	0.0506015	0.0471598	0.0464813	0.050188	0.0494393	0.0976172	0.0728714	0.0853478	0.0857654	0.0764083	0.0856952	0.0509744	0.0542616	0.0671148	0.0849407
4.9383	0.0485149	0.00171826	0.073314	0.0044219	0.0413741	0.0469688	0.0601817	0.0534635	0.0481598	0.0450247	0.0449904	0.048606	0.0478646	0.094059	0.0694956	0.0821975	0.0830518	0.073438	0.0828717	0.0483854	0.0517324	0.0650871	0.0828215
5.04804	0.0464698	0.00166402	0.0706792	0.00438816	0.0395056	0.0448335	0.0576971	0.0511883	0.0461201	0.0427125	0.0433253	0.0469981	0.0458479	0.0913681	0.0658611	0.0798393	0.0801114	0.0705368	0.0799392	0.0465076	0.0491288	0.0626738	0.0808253
5.15778	0.0444602	0.00158924	0.0686356	0.0044114	0.03775	0.0431234	0.0551165	0.0491525	0.0440969	0.0411175	0.0412949	0.0448684	0.0436222	0.0895406	0.0633414	0.0768808	0.0786021	0.0679158	0.0784831	0.0443508	0.0471169	0.0611373	0.0789876
5.26752	0.042476	0.00155758	0.0664861	0.00438753	0.0359159	0.0408459	0.0528049	0.0471883	0.0420549	0.0390647	0.0394407	0.0431546	0.0418141	0.0860129	0.0606009	0.0753457	0.0767699	0.0662339	0.0766864	0.0423063	0.0448274	0.0590344	0.0770435
5.37726	0.0407253	0.00143933	0.0640149	0.00427058	0.034584	0.0393841	0.0502005	0.045091	0.0405211	0.0373705	0.0379824	0.0412596	0.0401344	0.0828282	0.0573733	0.0728589	0.0736824	0.0636846	0.0736994	0.0406604	0.0429097	0.0572955	0.0751568
5.487	0.0390827	0.00134385	0.0621361	0.00429023	0.0333089	0.0380435	0.0479096	0.0429995	0.0386151	0.0359127	0.0364175	0.040033	0.0385048	0.0811919	0.0546192	0.0708309	0.0722027	0.0612021	0.0720832	0.0388324	0.0413613	0.0556245	0.0734133
5.59674	0.0373082	0.0012626	0.0600968	0.00432406	0.0319574	0.0363127	0.0455646	0.0411203	0.0365771	0.0342018	0.0350392	0.0383366	0.0366642	0.078968	0.0521385	0.0687499	0.0707858	0.0587238	0.0706259	0.0367752	0.0392601	0.0535518	0.0713891
5.70648	0.0355817	0.00127366	0.0579168	0.00428447	0.0301009	0.0343272	0.0437736	0.0395497	0.0350392	0.0323455	0.0334233	0.0366677	0.0350085	0.0769425	0.04975	0.0661773	0.0686884	0.056861	0.0686206	0.0351973	0.0372003	0.0510871	0.0686431
5.81622	0.0341518	0.00119312	0.0562099	0.00424903	0.0291318	0.0330681	0.0417624	0.0380224	0.033847	0.031122	0.0319239	0.0351861	0.0333025	0.0753552	0.0474874	0.0646122	0.066771	0.0548602	0.0666638	0.0340375	0.03567	0.0497431	0.0668985
5.92596	0.0328509	0.0011624	0.0548978	0.00429739	0.028059	0.0319514	0.0402947	0.036642	0.0325568	0.0298135	0.030598	0.033738	0.0320049	0.0746391	0.0460366	0.0629718	0.0658726	0.0532388	0.0657087	0.032734	0.034363	0.0479377	0.065476
6.0357	0.031864	0.00115997	0.0538374	0.00430934	0.0271387	0.030729	0.0391556	0.0358994	0.0318602	0.0288168	0.0296269	0.0326728	0.0308766	0.0731052	0.0444464	0.0625828	0.0653359	0.0523351	0.0651647	0.0320424	0.0331206	0.0464359	0.0638047
6.14544	0.0308264	0.00108744	0.0525732	0.00424969	0.0267077	0.0301844	0.0378201	0.034576	0.0309324	0.0282007	0.0283352	0.031303	0.029378	0.0720597	0.0430316	0.0610534	0.0636127	0.0512436	0.0635764	0.0310826	0.0323458	0.0453696	0.0623564
6.25518	0.0297349	0.00105392	0.0515088	0.00432731	0.0258841	0.0293853	0.0364915	0.0335841	0.0296543	0.0273453	0.0272847	0.0299223	0.0280625	0.0707897	0.0415316	0.0604748	0.0634386	0.0497972	0.063296	0.0296552	0.0312352	0.0438801	0.0609899
6.36492	0.0286127	0.00106606	0.0502664	0.00432621	0.0248233	0.0282284	0.0352729	0.0327266	0.0285345	0.0261987	0.025891	0.0289353	0.0269037	0.0692128	0.0400953	0.0594162	0.0624707	0.0487126	0.0624025	0.0285999	0.0299326	0.0424519	0.0593692
6.47466	0.0274544	0.000998745	0.0489071	0.00429261	0.0239541	0.0268799	0.0337133	0.0313345	0.0273705	0.0252165	0.0249717	0.0278277	0.0258211	0.0678203	0.0385565	0.057691	0.0608865	0.0474654	0.0608022	0.0272867	0.0287694	0.0415706	0.0582228
6.5844	0.0263607	0.000966115	0.0475976	0.00427907	0.0229006	0.0259285	0.0323937	0.030048	0.0261994	0.0240477	0.0240534	0.0268873	0.0247878	0.0660009	0.0369557	0.0561311	0.0597188	0.0458518	0.0596135	0.0260776	0.0274306	0.040803	0.0573932
6.69414	0.0252815	0.000952242	0.0464534	0.00427988	0.0219687	0.0248631	0.0311061	0.0292086	0.0252295	0.0230017	0.0231337	0.0254985	0.0235237	0.0648004	0.0353516	0.0552744	0.0587059	0.0447448	0.0585646	0.0252108	0.0263021	0.0396213	0.0559579
6.80388	0.0242831	0.000890898	0.0453976	0.00428736	0.0212871	0.0240376	0.0297081	0.0278583	0.0242857	0.0221184	0.0219659	0.0246842	0.0226027	0.0637739	0.0340444	0.0535103	0.0578851	0.04313	0.0577266	0.0242945	0.0253551	0.0387729	0.0554836
6.91362	0.0234826	0.000869717	0.0444557	0.00429597	0.0204046	0.0232223	0.0286534	0.0270661	0.0233818	0.0213342	0.0213842	0.0240772	0.0218198	0.0628533	0.0329551	0.0527957	0.0569151	0.0421334	0.0568108	0.0233069	0.0244258	0.0378874	0.0544733
7.02336	0.0226621	0.000849177	0.0436208	0.00433031	0.0196552	0.0221216	0.0276337	0.0262679	0.0226666	0.02036	0.020801	0.0232787	0.0211744	0.0616932	0.0316343	0.052349	0.0563886	0.0414597	0.0562806	0.0225985	0.0233353	0.0368058	0.0536631
7.1331	0.0219009	0.000795544	0.0427009	0.00426238	0.0191704	0.0215818	0.0265682	0.0252748	0.0220298	0.0198004	0.0199895	0.0223063	0.0203866	0.0603527	0.0306459	0.0509963	0.0551596	0.0404601	0.055161	0.0219549	0.0227153	0.0365024	0.0530612
7.24284	0.0212032	0.000753676	0.0416124	0.00426048	0.0187133	0.0209719	0.0255263	0.0245407	0.021045	0.0192309	0.0193614	0.0217575	0.0196818	0.0595086	0.0291596	0.0500416	0.0540075	0.0390921	0.0538967	0.0209858	0.0219481	0.0354756	0.0520086
7.35258	0.020416	0.000732593	0.040742	0.0042695	0.0179002	0.0199762	0.0245194	0.0236367	0.0202493	0.0183062	0.018753	0.0212976	0.0191055	0.0578138	0.0277924	0.0488697	0.0536541	0.0384121	0.0535657	0.0201771	0.0209709	0.0348267	0.0513376
7.46232	0.0196791	0.000683701	0.0398278	0.00424176	0.0172608	0.0193379	0.0234533	0.0226955	0.0195758	0.0177222	0.0181038	0.0205193	0.018443	0.0570063	0.0268722	0.0479763	0.0520075	0.0370732	0.051932	0.0194018	0.0201607	0.0344308	0.0514176
7.57206	0.0189442	0.000676188	0.0389166	0.00425192	0.0165233	0.0187005	0.0226288	0.0219813	0.01863	0.0169507	0.017516	0.0198206	0.0177464	0.0560607	0.0256921	0.0468493	0.0514442	0.0358747	0.0513328	0.018539	0.019357	0.0336761	0.0503404
7.6818	0.0182289	0.000682129	0.0382924	0.00426791	0.0158501	0.0176124	0.0218814	0.0214324	0.0181451	0.0162887	0.0167676	0.0190586	0.0170238	0.0557692	0.0249968	0.0462887	0.0508001	0.0352136	0.0506497	0.0180625	0.0185153	0.0330047	0.049623
7.79154	0.0176179	0.000662745	0.0375791	0.00425268	0.0154077	0.0173095	0.0211253	0.0207495	0.0175695	0.0156869	0.0161506	0.0183714	0.0161907	0.0547403	0.0239416	0.0455119	0.0501274	0.0344003	0.0500362	0.0174843	0.0179434	0.0326724	0.0489335
7.90128	0.0170613	0.000640103	0.0372456	0.0043102	0.0150426	0.01679	0.020368	0.0202008	0.016945	0.0152675	0.0155364	0.0178034	0.0155978	0.0545036	0.0232738	0.0452046	0.0500362	0.0338779	0.0499009	0.0169152	0.0174743	0.0322956	0.0489742
8.01102	0.0165119	0.000629609	0.0366665	0.00428956	0.0145785	0.0162063	0.0197744	0.0195966	0.0165027	0.0146852	0.0150205	0.0171827	0.0150604	0.0531556	0.0226384	0.0447517	0.0494858	0.0333976	0.0494495	0.0164447	0.0167985	0.031968	0.0485755
8.12076	0.016045	0.000606469	0.0361237	0.00431222	0.0142394	0.0157772	0.0190974	0.0190742	0.0160839	0.0143258	0.0145815	0.0167296	0.014496	0.0526903	0.0217577	0.0438969	0.0492741	0.0328457	0.0490991	0.0158917	0.0163324	0.0313796	0.0480693
8.2305	0.0155169	0.000587647	0.0353863	0.00429957	0.0137603	0.015351	0.0184104	0.0184864	0.0154488	0.0138608	0.0141049	0.0162556	0.0139736	0.0513947	0.021058	0.0436858	0.0487141	0.032098	0.0485492	0.0152511	0.015697	0.0303017	0.0471134
8.34024	0.014999	0.000574761	0.0347539	0.00428722	0.0133368	0.0147959	0.0177902	0.0179657	0.0148647	0.0133267	0.0136281	0.0157399	0.0135434	0.0511095	0.0203201	0.042863	0.0480689	0.0315025	0.0479265	0.0147559	0.0152713	0.0296069	0.0461146
8.44998	0.0145235	0.000546543	0.0340066	0.00424264	0.0129972	0.0143509	0.0170973	0.0173414	0.0144939	0.0128696	0.0132267	0.0153074	0.0130273	0.0496717	0.0195176	0.0420422	0.0472851	0.030972	0.0471774	0.0142583	0.0146133	0.0290857	0.045443
8.55972	0.0140552	0.000533518	0.0334347	0.00426082	0.0125812	0.0139283	0.016498	0.016827	0.0138029	0.0124187	0.0128301	0.0149991	0.0126117	0.0494575	0.0187242	0.0412446	0.0467758	0.0301466	0.0466477	0.0136649	0.0141315	0.0286487	0.0449057
8.66946	0.013548	0.000534239	0.0327454	0.00423793	0.0120602	0.0133185	0.0158958	0.016428	0.0132367	0.0118429	0.0124338	0.0145259	0.0121904	0.0482327	0.0181252	0.0408579	0.0460279	0.0298457	0.0459937	0.0130347	0.0134395	0.0277482	0.0441486
8.7792	0.0131213	0.000520951	0.0322031	0.00422116	0.0115862	0.0128624	0.0152426	0.0159433	0.0130131	0.0113613	0.0122063	0.0141796	0.0116971	0.0481011	0.017644	0.0398441	0.0453377	0.0289493	0.0452405	0.0128825	0.0128441	0.0273905	0.0437974
8.88894	0.0127506	0.000483426	0.0316356	0.00419943	0.011415	0.0125849	0.0146767	0.0153754	0.0125301	0.0111363	0.0118086	0.0138264	0.0114017	0.0474255	0.0169378	0.0393193	0.0447621	0.0281077	0.044701	0.0125002	0.0125955	0.0268701	0.043137
8.99868	0.012374	0.000472919	0.0313735	0.0042496	0.0111067	0.0122756	0.0142321	0.0149775	0.0122484	0.0107737	0.0114002	0.0133302	0.0110214	0.0474525	0.0162571	0.0391745	0.0447426	0.0279202	0.0446369	0.0119859	0.0122241	0.0266983	0.0426428
9.10842	0.0120047	0.000472733	0.0309235	0.00422649	0.0106872	0.0118593	0.013781	0.0146053	0.0118613	0.0104089	0.0111095	0.0130937	0.0106365	0.0465397	0.0158855	0.0385801	0.0441328	0.0272637	0.0439995	0.0116396	0.0118561	0.0264429	0.0428949
9.21816	0.0116757	0.000456219	0.030573	0.00424976	0.0105179	0.0115269	0.013334	0.0141885	0.0114505	0.0100788	0.0108191	0.0128238	0.0103418	0.0462731	0.0153594	0.0383098	0.0438228	0.0270066	0.0436581	0.0111982	0.0114619	0.0259522	0.042688
9.3279	0.01137	0.000462668	0.0302565	0.00426827	0.0101552	0.0110716	0.0129509	0.0139727	0.0112078	0.00972243	0.010601	0.0125821	0.0100663	0.0465749	0.0150298	0.0376213	0.0435815	0.0266464	0.043511	0.0109987	0.0109681	0.0256036	0.0420294
9.43764	0.0110705	0.000454126	0.0300197	0.00426833	0.00989357	0.0108931	0.012662	0.0136293	0.0109637	0.00948679	0.0102355	0.0121509	0.00972003	0.0460046	0.014644	0.0378323	0.0435621	0.0261961	0.0433658	0.0108052	0.0107728	0.0254822	0.0415318
9.54738	0.0108398	0.000438077	0.0296713	0.00424789	0.00980671	0.0107888	0.0122452	0.0133116	0.0106171	0.00935721	0.00999537	0.0120218	0.0094144	0.0453312	0.0143877	0.0376068	0.0433487	0.0261735	0.0431931	0.0105116	0.0105289	0.0248407	0.0407914
9.65712	0.0105374	0.000441459	0.0295588	0.00431431	0.00941613	0.0103883	0.0119446	0.013055	0.0104038	0.00903699	0.00969326	0.0117122	0.00918615	0.0458278	0.0139946	0.037321	0.0435991	0.0257837	0.0434264	0.0102909	0.0102196	0.0245883	0.0405361
9.76686	0.0102794	0.000426106	0.0291413	0.00428073	0.00936939	0.010161	0.011562	0.0127649	0.0101501	0.00884526	0.00941365	0.0113835	0.00886519	0.0453291	0.0135197	0.0370176	0.0427686	0.0254848	0.0426087	0.00990754	0.00998406	0.024466	0.0403266
9.8766	0.0100349	0.00041378	0.0288142	0.00428229	0.00921102	0.00992336	0.0112361	0.0124535	0.00981929	0.0086168	0.00922868	0.0111673	0.00865836	0.0451827	0.0131415	0.0366719	0.042272	0.0249763	0.0421216	0.0096278	0.00972638	0.0241475	0.0402741
9.98634	0.00979267	0.000418267	0.0284667	0.00426213	0.00885174	0.00966856	0.0108644	0.0121999	0.00962144	0.00827401	0.00911197	0.011099	0.00844308	0.0440457	0.0127388	0.0363328	0.0422261	0.0246915	0.0419505	0.00938769	0.00940743	0.0239498	0.0399371
10.0961	0.00953019	0.000406465	0.0282234	0.00425726	0.00861322	0.0094362	0.010526	0.0119038	0.00934752	0.00809752	0.00889911	0.0107811	0.00816716	0.0438267	0.0124724	0.0357368	0.041611	0.0243729	0.0414961	0.00919907	0.0090692	0.0240593	0.0403909
10.2058	0.00929368	0.000399069	0.0279832	0.00428903	0.00845434	0.00926742	0.010223	0.0116221	0.00909022	0.00786974	0.00863052	0.0105458	0.00793997	0.0440427	0.0120653	0.0354184	0.0414458	0.0240267	0.0413231	0.0088461	0.00883417	0.0237196	0.0401102
10.3156	0.00904269	0.000406904	0.0278049	0.00429455	0.00816769	0.0089447	0.0100022	0.0114869	0.00888855	0.00763471	0.0083314	0.0102322	0.00769585	0.0431471	0.0119317	0.0355749	0.0417423	0.0238893	0.0415803	0.00869239	0.00852055	0.023331	0.03964
10.4253	0.00880404	0.00039073	0.0274073	0.00424426	0.00806238	0.00874548	0.00967265	0.0111352	0.00867979	0.0074865	0.00811905	0.00996493	0.00737032	0.0429847	0.0115279	0.034986	0.0407405	0.023596	0.0405977	0.00850087	0.00838337	0.0232556	0.0395003
10.535	0.00858855	0.000383331	0.0271618	0.00427269	0.00799151	0.00860091	0.00934374	0.0109334	0.00836819	0.00730301	0.00789993	0.00970293	0.0071533	0.0430561	0.0111699	0.0347258	0.0407369	0.0231541	0.0406187	0.00825973	0.00816197	0.0227182	0.039017
10.6448	0.00837851	0.000384984	0.0268767	0.00423832	0.00775661	0.00830883	0.00917932	0.0106885	0.00822171	0.00707753	0.00769128	0.00954708	0.00693579	0.042065	0.0109649	0.0346157	0.040631	0.0232828	0.0404818	0.00802875	0.00791066	0.0224656	0.0383206
10.7545	0.00816833	0.000381683	0.0265942	0.00425278	0.00753458	0.00816584	0.00883867	0.0105183	0.00808617	0.00688333	0.00742799	0.00929143	0.0067686	0.0424474	0.0106426	0.0342621	0.0403314	0.0226271	0.0402391	0.00791385	0.00769411	0.0219709	0.0378132
10.8643	0.00800618	0.000376313	0.0263702	0.00425555	0.00747073	0.00803823	0.00862267	0.0102891	0.00787825	0.006774	0.00728878	0.00916805	0.00652578	0.0422714	0.0103315	0.0338481	0.0400234	0.0222331	0.039911	0.00764776	0.00755617	0.0219367	0.0379432
10.974	0.00781397	0.000365784	0.0261637	0.00425053	0.00733378	0.00776894	0.00837874	0.0100301	0.00774106	0.0065662	0.00716934	0.00896397	0.00637364	0.0414354	0.0101501	0.0336582	0.0402191	0.0223894	0.0400262	0.00741526	0.00730958	0.0215345	0.0374993
11.0837	0.00764455	0.000370904	0.0260707	0.00428059	0.0071174	0.00760392	0.0081986	0.00988743	0.0075219	0.00634168	0.0070299	0.00885733	0.00624277	0.0414461	0.00983361	0.03371	0.0402948	0.0221615	0.040237	0.00732258	0.0070951	0.0214553	0.0371514
11.1935	0.0074864	0.000371652	0.0259063	0.00428313	0.00692002	0.00744456	0.00799527	0.00968	0.00734601	0.00621404	0.00683972	0.00883599	0.00610198	0.0418739	0.00957974	0.0335429	0.0396488	0.0217345	0.0395612	0.00716645	0.00696777	0.0215447	0.0374428
11.3032	0.00726168	0.000409761	0.0258512	0.00432143	0.00689809	0.00732502	0.00783	0.00966098	0.00724037	0.00607233	0.00574118	0.0086455	0.00594165	0.0419114	0.00945227	0.0334032	0.0398309	0.0217169	0.0397253	0.00700519	0.0067197	0.0212316	0.037515
11.413	0.00713318	0.000397904	0.0255367	0.00424892	0.00680173	0.00713137	0.00759563	0.00952756	0.00715018	0.00599589	0.00573067	0.00845697	0.00580858	0.0408147	0.00926296	0.0332129	0.0394144	0.0216551	0.0392935	0.00694296	0.00667451	0.0211396	0.0369561
11.5227	0.00696046	0.000396164	0.0253877	0.00424477	0.00672203	0.00705268	0.00736348	0.00931532	0.00692438	0.0058996	0.00544595	0.00828682	0.00563389	0.0406378	0.00896717	0.0329028	0.0391459	0.0215598	0.0390355	0.00674087	0.00659381	0.0212802	0.0370128
11.6324	0.00682575	0.00039454	0.0251357	0.00422246	0.00653062	0.00700537	0.00719276	0.00916958	0.00677818	0.00572027	0.00537284	0.00815878	0.00550336	0.0396595	0.00880609	0.0328264	0.0389606	0.0212576	0.0388967	0.00657398	0.00640443	0.0210616	0.0369104
11.7422	0.00663465	0.000383225	0.0249819	0.00426163	0.00629282	0.00669101	0.00704405	0.00891972	0.00663522	0.00555852	0.00528865	0.007948	0.00533391	0.0409595	0.00865444	0.0324014	0.0385843	0.0208503	0.0383946	0.00639436	0.00618293	0.0206143	0.0367826
11.8519	0.00657114	0.000366754	0.0249352	0.00424695	0.00614178	0.00661001	0.00681389	0.0087925	0.00659534	0.00539769	0.00567497	0.00788649	0.0052276	0.0400912	0.00848253	0.0324275	0.0385924	0.0208933	0.0384858	0.00645873	0.00601691	0.0209176	0.0369864
11.9617	0.00635157	0.000467147	0.0249853	0.00425867	0.00599074	0.00783241	0.00670424	0.00872434	0.00524429	0.00482129	0.00485086	0.00786474	0.00513125	0.0402787	0.0083519	0.0323697	0.0388017	0.021144	0.0385805	0.00638813	0.00624016	0.0207567	0.0369413

## Sheet: Fig_2C
Figure 2C
	Log photons (a.u.); average				Log photons (a.u.); individual data
	Plpwt/y		Plpnull/y		Plpwt/y								Plpnull/y
time (ns)	mean	SEM	mean	SEM	n = 1	n = 2	n = 3	n = 4	n = 5	n = 6	n = 7	n = 8	n = 1	n = 2	n = 3	n = 4	n = 5
0.10974	0.1788	0.0579846	0.108257	0.078032	0.516895	0.0848992	0.0314916	0.01108	0.0254697	0.275652	0.217637	0.267276	0.0172026	0.0156348	0.0084859	0.0435467	0.456414
0.21948	0.496401	0.13317	0.677054	0.174594	0.967976	0.595337	0.0342247	0.0137711	0.028785	0.794996	0.747209	0.788911	0.991401	0.996345	0.00976975	0.453588	0.934169
0.32922	0.996174	0.00354688	0.99518	0.00210609	0.969633	1	1	0.999761	1	1	1	1	0.997311	0.999525	0.990011	0.989055	1
0.43896	0.930064	0.00933779	0.943809	0.0147238	0.876429	0.953592	0.931224	0.97445	0.928216	0.917374	0.932243	0.926988	0.922304	0.925079	0.985143	0.98132	0.905197
0.5487	0.826276	0.0109512	0.847492	0.0139281	0.778124	0.856327	0.828608	0.886999	0.825231	0.805217	0.820111	0.809588	0.827523	0.832404	0.900137	0.864165	0.813229
0.65844	0.735655	0.010384	0.761702	0.0101702	0.690264	0.762759	0.734046	0.795152	0.731449	0.717286	0.732778	0.721505	0.752383	0.760903	0.801406	0.762468	0.731348
0.76818	0.665205	0.00958732	0.691947	0.00937819	0.625572	0.681191	0.666847	0.723932	0.667525	0.646363	0.659602	0.650609	0.690324	0.69842	0.727797	0.676111	0.667083
0.87792	0.606673	0.0095855	0.634348	0.00850789	0.56937	0.620482	0.610505	0.665481	0.612367	0.587139	0.600767	0.587274	0.635216	0.643766	0.664433	0.613939	0.614385
0.98766	0.557272	0.00888427	0.585396	0.008327	0.521812	0.569564	0.5604	0.610895	0.564846	0.539337	0.553048	0.538273	0.592743	0.601078	0.606433	0.560191	0.566536
1.0974	0.516938	0.00893624	0.543132	0.00872838	0.482389	0.524872	0.525691	0.569798	0.528923	0.497403	0.509594	0.496832	0.551148	0.560047	0.563855	0.513877	0.526734
1.20714	0.480465	0.0086791	0.506179	0.00834251	0.450296	0.487036	0.491025	0.530672	0.494881	0.460965	0.472564	0.456283	0.5146	0.523442	0.523341	0.475849	0.493665
1.31688	0.449594	0.00771184	0.473299	0.00773748	0.420887	0.457674	0.458575	0.493837	0.460676	0.433352	0.443482	0.428268	0.481512	0.49149	0.485161	0.443547	0.464785
1.42662	0.422328	0.00739431	0.442324	0.00708627	0.39375	0.428506	0.431238	0.464053	0.435277	0.408013	0.415618	0.402169	0.449242	0.458913	0.45356	0.41489	0.435012
1.53636	0.394724	0.00701111	0.41411	0.00640051	0.367043	0.402421	0.403112	0.432689	0.407814	0.382328	0.388854	0.373527	0.420771	0.430213	0.422139	0.389176	0.40825
1.6461	0.369695	0.00676679	0.388222	0.00623821	0.339982	0.376393	0.378369	0.405243	0.382703	0.358481	0.36542	0.350969	0.395489	0.404329	0.393647	0.363418	0.384226
1.75584	0.347077	0.00650803	0.365119	0.00682861	0.319675	0.349712	0.357278	0.381741	0.36056	0.334989	0.342983	0.329683	0.37323	0.382198	0.369256	0.337018	0.363893
1.86558	0.326492	0.0064357	0.344541	0.00676542	0.302384	0.3299	0.336843	0.360031	0.341574	0.313367	0.321334	0.306502	0.353471	0.362371	0.347274	0.31746	0.34213
1.97532	0.307919	0.00655212	0.325365	0.00664146	0.283514	0.312558	0.319769	0.340633	0.323919	0.293712	0.30199	0.28726	0.335493	0.344165	0.327555	0.300925	0.318687
2.08506	0.291155	0.00661029	0.306908	0.0067817	0.26954	0.294445	0.305444	0.322984	0.309017	0.27558	0.282712	0.269514	0.317556	0.325577	0.310478	0.282268	0.298661
2.1948	0.274966	0.00667478	0.289782	0.00580287	0.2562	0.281113	0.289688	0.305049	0.29386	0.258004	0.265431	0.250387	0.298283	0.305952	0.292925	0.26841	0.283343
2.30454	0.259431	0.0063531	0.274015	0.00540629	0.241135	0.268223	0.272941	0.286588	0.277685	0.242969	0.250163	0.235745	0.282666	0.290291	0.274202	0.255312	0.267602
2.41428	0.245373	0.00642576	0.258642	0.00507412	0.225895	0.253335	0.259801	0.272483	0.264489	0.228243	0.235909	0.222828	0.266249	0.273498	0.25934	0.240119	0.254003
2.52402	0.231385	0.00611069	0.243349	0.00475039	0.213165	0.237903	0.246472	0.256333	0.249765	0.21524	0.223166	0.20904	0.250176	0.257157	0.243962	0.225627	0.239824
2.63376	0.21887	0.00566363	0.230617	0.00503928	0.200268	0.225104	0.232642	0.241598	0.236128	0.204253	0.212264	0.198704	0.238808	0.245905	0.228883	0.212867	0.226621
2.7435	0.208546	0.00554609	0.218893	0.00500578	0.188909	0.212142	0.223382	0.230217	0.226203	0.194776	0.202783	0.189953	0.226795	0.23305	0.218062	0.199985	0.216573
2.85324	0.198098	0.00543535	0.207917	0.0051691	0.179878	0.200516	0.212732	0.218879	0.216298	0.184801	0.19285	0.178828	0.215501	0.222351	0.206252	0.187936	0.207545
2.96298	0.189277	0.00522853	0.199157	0.00518374	0.171373	0.191707	0.204201	0.208759	0.206501	0.176701	0.184118	0.170853	0.207032	0.213598	0.196161	0.179357	0.199639
3.07272	0.182296	0.00514079	0.190288	0.005136	0.165445	0.183131	0.197758	0.20168	0.199347	0.169754	0.176603	0.164648	0.197706	0.204214	0.18835	0.170134	0.191039
3.18246	0.174855	0.00479259	0.181678	0.00470141	0.158771	0.177602	0.188957	0.192607	0.190008	0.163403	0.170156	0.157335	0.188543	0.19402	0.1793	0.163118	0.18341
3.2922	0.167235	0.00449274	0.173517	0.00469784	0.150522	0.170539	0.180836	0.182545	0.181622	0.157035	0.16361	0.15117	0.179784	0.186637	0.169929	0.155551	0.175683
3.40194	0.159838	0.00449166	0.165512	0.00459797	0.144052	0.162169	0.173779	0.175114	0.17475	0.149261	0.155811	0.143763	0.171558	0.177494	0.162373	0.147397	0.168741
3.51168	0.151894	0.00446756	0.157845	0.00435394	0.136966	0.155618	0.16606	0.166061	0.166801	0.141166	0.147365	0.135117	0.162936	0.169171	0.154149	0.140875	0.162096
3.62142	0.144823	0.00446789	0.150577	0.00440322	0.129174	0.148669	0.159569	0.157978	0.159973	0.133745	0.14073	0.128748	0.156896	0.1624	0.14593	0.134022	0.153636
3.73116	0.138707	0.00442623	0.144085	0.00457899	0.123634	0.140395	0.153684	0.15173	0.154752	0.127975	0.134161	0.123325	0.150832	0.156421	0.1403	0.126558	0.146315
3.8409	0.132706	0.00446019	0.137821	0.00438315	0.118925	0.134775	0.148499	0.145219	0.148813	0.121493	0.127297	0.116627	0.144676	0.148859	0.133906	0.120871	0.140794
3.95064	0.126895	0.00457317	0.132517	0.00420523	0.113804	0.130366	0.143126	0.139306	0.143352	0.114788	0.120065	0.110357	0.138979	0.143643	0.127552	0.116926	0.135484
4.06038	0.121406	0.00479894	0.126683	0.0040483	0.108898	0.125027	0.138713	0.134295	0.138824	0.108158	0.112856	0.104475	0.132649	0.137175	0.122356	0.111351	0.129883
4.17012	0.115815	0.00471019	0.120716	0.00368037	0.104116	0.120034	0.133101	0.127792	0.132665	0.102623	0.107643	0.0985455	0.126094	0.130032	0.116037	0.107023	0.124394
4.27986	0.11048	0.00446061	0.114987	0.00356365	0.0984179	0.11548	0.126856	0.12109	0.126419	0.0982949	0.103078	0.0942051	0.120038	0.124246	0.109977	0.102034	0.118641
4.3896	0.105761	0.00431404	0.109598	0.00358522	0.0933197	0.109603	0.122055	0.116063	0.121262	0.094294	0.0989637	0.0905306	0.114473	0.118148	0.104632	0.0963124	0.114425
4.49934	0.10057	0.00418688	0.104618	0.0035455	0.0883855	0.103879	0.117023	0.10941	0.116005	0.0901227	0.0941767	0.0855559	0.109174	0.112831	0.0992324	0.091712	0.110138
4.60908	0.0959718	0.0040639	0.0996935	0.00347832	0.0840143	0.098924	0.112383	0.103922	0.111081	0.0856338	0.0900917	0.081724	0.104045	0.10749	0.0943136	0.0870655	0.105553
4.71882	0.0920982	0.00406181	0.0953657	0.00347031	0.0806933	0.0940614	0.108853	0.100127	0.107354	0.0817423	0.0859686	0.0779845	0.0997646	0.103005	0.0900917	0.0826918	0.101276
4.82856	0.0883661	0.00390371	0.09165	0.00355805	0.0771064	0.0911808	0.104414	0.0953381	0.103086	0.0783153	0.082721	0.0747682	0.0954571	0.0987647	0.0856456	0.0791108	0.099272
4.9383	0.0849819	0.00375039	0.0877224	0.00349607	0.0735909	0.0872425	0.100564	0.0916742	0.0992101	0.0755956	0.0795532	0.072424	0.090964	0.0939817	0.0816714	0.0756701	0.0963248
5.04804	0.0818164	0.00365117	0.084252	0.00349043	0.070693	0.0833599	0.0975724	0.0874185	0.0958933	0.0727489	0.077038	0.069807	0.0873897	0.0903845	0.0782799	0.0722101	0.0929957
5.15778	0.0783851	0.00363349	0.0811796	0.00349947	0.0673224	0.0805355	0.0940166	0.0834133	0.0924317	0.0692706	0.0738412	0.0662492	0.0846149	0.086867	0.0747709	0.0694001	0.090245
5.26752	0.0754025	0.00358333	0.0777338	0.00348206	0.0646257	0.0770306	0.0911586	0.0802853	0.0892983	0.0663653	0.0705802	0.0638756	0.0806115	0.0826201	0.0716499	0.0661111	0.0876767
5.37726	0.0726048	0.00342456	0.0744924	0.00342377	0.0625962	0.0737849	0.0879475	0.0770027	0.0858615	0.0636204	0.0683683	0.0616571	0.0772094	0.0788582	0.0683789	0.0633128	0.0847029
5.487	0.0697788	0.00340207	0.0718333	0.00349198	0.0597785	0.0716297	0.084888	0.0737596	0.0830194	0.0609996	0.0654076	0.058748	0.0743536	0.0760391	0.0652381	0.0608752	0.0826606
5.59674	0.0669447	0.00338533	0.0687004	0.00333553	0.0565203	0.0688442	0.0824507	0.0700012	0.0800271	0.0584334	0.062889	0.0563913	0.0709363	0.0727457	0.062291	0.0583797	0.0791495
5.70648	0.064211	0.00332158	0.0656302	0.00335809	0.0542562	0.0654464	0.0795908	0.0670463	0.0773098	0.0558631	0.0601006	0.0540748	0.0679067	0.0697166	0.0594184	0.0550322	0.0760769
5.81622	0.061791	0.00332134	0.0634752	0.00332292	0.0524396	0.0634591	0.0771777	0.0642834	0.0748577	0.0531827	0.0576732	0.0512548	0.0661758	0.0676362	0.0570298	0.0530249	0.0735094
5.92596	0.0596125	0.00333928	0.0613457	0.00320312	0.0504302	0.0613346	0.0748977	0.0620214	0.0730601	0.0508014	0.0551691	0.0491859	0.0642224	0.0653869	0.0548001	0.0514391	0.0708802
6.0357	0.0582154	0.0034358	0.0594242	0.00319188	0.0494639	0.0594793	0.0745407	0.0605932	0.0717394	0.0490416	0.0533435	0.0475218	0.0622726	0.0635443	0.0531803	0.0493057	0.068818
6.14544	0.0563307	0.0034632	0.0576261	0.00301352	0.0481829	0.0585166	0.0726792	0.0583646	0.0698164	0.0469868	0.0511069	0.044992	0.0604628	0.0614826	0.0512663	0.0484147	0.0665039
6.25518	0.0544446	0.00352418	0.0560469	0.00300495	0.0460717	0.0571289	0.0709661	0.0568019	0.0679568	0.0445081	0.0489928	0.0431305	0.0588519	0.0603968	0.0496174	0.0468142	0.0645541
6.36492	0.0526152	0.00354287	0.0539188	0.00292308	0.0444705	0.054814	0.0694587	0.0547697	0.0663532	0.0427367	0.046852	0.0414673	0.0564708	0.0576682	0.0479602	0.044874	0.0626209
6.47466	0.0507201	0.00354605	0.051898	0.00294194	0.0423774	0.0529349	0.0679423	0.0525731	0.0641477	0.0410278	0.0452794	0.039478	0.054241	0.0551472	0.0457522	0.0431636	0.0611861
6.5844	0.0487807	0.00350381	0.0502134	0.0029886	0.0407456	0.0511055	0.0655119	0.0501407	0.0625646	0.0391097	0.0432183	0.0378493	0.0528004	0.05347	0.0438645	0.0413678	0.0595644
6.69414	0.0471523	0.0035154	0.048372	0.00296444	0.0393076	0.0490305	0.0642211	0.0489798	0.0606956	0.0374135	0.041324	0.0362468	0.050787	0.0513009	0.0421434	0.0397011	0.0579275
6.80388	0.0454195	0.00346598	0.0469301	0.00301314	0.0376902	0.0478185	0.062155	0.0464961	0.0589123	0.035864	0.0398503	0.0345694	0.0495221	0.0498922	0.0402659	0.0383622	0.0566081
6.91362	0.0440624	0.00342681	0.0452935	0.0029958	0.0361028	0.0461774	0.0606981	0.0452184	0.0573843	0.0346858	0.0387579	0.0334742	0.0477627	0.0481764	0.0386956	0.0368156	0.0550174
7.02336	0.0428127	0.0034329	0.0438706	0.00298704	0.0351567	0.0443848	0.059665	0.043414	0.0564696	0.0335299	0.0374058	0.0324754	0.0462256	0.0463597	0.0374049	0.0355108	0.0538519
7.1331	0.0413785	0.0033271	0.0425667	0.00301787	0.0341165	0.0432314	0.0579377	0.0421844	0.0540875	0.0323147	0.0360335	0.0311224	0.0446978	0.0447774	0.0358985	0.0344809	0.0529789
7.24284	0.0401486	0.00335854	0.0411022	0.0029681	0.0326315	0.0424352	0.0569114	0.0403334	0.0530184	0.0310103	0.0347341	0.0301143	0.042993	0.0429283	0.0343766	0.0335631	0.0516501
7.35258	0.0388475	0.00325303	0.039581	0.00302802	0.0314127	0.0407435	0.0550463	0.0387298	0.0516082	0.03011	0.0338796	0.0292499	0.0411643	0.0414281	0.0329329	0.0318644	0.0505154
7.46232	0.0375158	0.00320797	0.0384529	0.00309621	0.0301763	0.039502	0.0536292	0.0371375	0.0499595	0.0289303	0.0327502	0.0280413	0.0400097	0.0400236	0.0316937	0.0307166	0.049821
7.57206	0.0364302	0.00323383	0.0372381	0.00309007	0.0289063	0.0380604	0.0529915	0.0360372	0.0488172	0.0279892	0.031532	0.0271076	0.038898	0.0385854	0.0305735	0.0295001	0.0486333
7.6818	0.0352962	0.00324	0.0360221	0.00314096	0.0279297	0.036297	0.0519124	0.0349079	0.0479667	0.0268447	0.0304037	0.0261077	0.037489	0.0374867	0.0294353	0.0280447	0.0476547
7.79154	0.0341291	0.0032338	0.0351379	0.00316531	0.0271884	0.0356384	0.0507038	0.0336073	0.0465887	0.0255279	0.0290998	0.0246784	0.0366979	0.0364063	0.0282991	0.0273548	0.0469316
7.90128	0.0332462	0.00324305	0.0343425	0.00324915	0.0264085	0.0348815	0.0499226	0.0323089	0.0457814	0.0246507	0.0281176	0.0238984	0.0359716	0.0355022	0.0273445	0.0263948	0.0464993
8.01102	0.0324303	0.00326062	0.0333023	0.00322043	0.025688	0.0337958	0.0491666	0.0316582	0.0451552	0.0237426	0.0271265	0.0231096	0.03443	0.0341211	0.0265579	0.0256929	0.0457098
8.12076	0.0314521	0.00324181	0.0323153	0.00322354	0.0248585	0.0329792	0.0483152	0.0305295	0.0438082	0.0227826	0.0261378	0.0222055	0.0335097	0.0330547	0.0254665	0.0248024	0.0447434
8.2305	0.0305693	0.00321331	0.0314398	0.00315081	0.0240155	0.0322518	0.0472518	0.0295974	0.0427874	0.0218735	0.0253594	0.0214178	0.0327937	0.031999	0.0247006	0.0241322	0.0435735
8.34024	0.0298147	0.00326937	0.0304698	0.00312007	0.0230802	0.0313407	0.0467121	0.02852	0.0425569	0.0211641	0.0244543	0.0206894	0.0317909	0.0308914	0.0239232	0.0232008	0.0425426
8.44998	0.0289471	0.00325139	0.0295574	0.00308224	0.0223717	0.030374	0.0458358	0.0275629	0.0415772	0.0204004	0.0236437	0.0198108	0.0308143	0.0300571	0.0230438	0.0223983	0.0414736
8.55972	0.0280804	0.00318112	0.0285903	0.00310197	0.0213731	0.0295824	0.0447032	0.0266185	0.0402987	0.019683	0.0230954	0.0192885	0.0298712	0.0288669	0.0220498	0.0214992	0.0406641
8.66946	0.0272513	0.00313594	0.0276825	0.00308608	0.0205695	0.0284451	0.0440618	0.025537	0.0389826	0.0190627	0.0224966	0.0188551	0.0289005	0.0279935	0.0212643	0.0205519	0.0397024
8.7792	0.0264715	0.00310041	0.0268173	0.00307472	0.0202321	0.0274326	0.0428159	0.024692	0.038525	0.0183541	0.0216542	0.0180659	0.0281736	0.0270115	0.0203936	0.019732	0.0387757
8.88894	0.0257832	0.00306067	0.0262221	0.00311131	0.0195348	0.0272325	0.0420005	0.0239378	0.0373862	0.0176774	0.0210139	0.0174826	0.0273994	0.0263691	0.0196293	0.0192843	0.0384287
8.99868	0.0251542	0.00308973	0.0255342	0.00308138	0.0188449	0.0264567	0.0418784	0.0230691	0.0365697	0.0170872	0.0203635	0.0169639	0.0266457	0.0255608	0.0189974	0.0187776	0.0376896
9.10842	0.0244856	0.00305872	0.0250658	0.00319353	0.0182129	0.0257879	0.040897	0.02232	0.035973	0.0165074	0.0198781	0.0163087	0.0263164	0.0251883	0.018249	0.017987	0.0375881
9.21816	0.0239003	0.0030426	0.0245489	0.00319133	0.0176103	0.0250279	0.040308	0.021559	0.0353481	0.0159821	0.0194016	0.0159656	0.0258903	0.0245023	0.0177417	0.0175253	0.0370846
9.3279	0.0233831	0.00304783	0.0238904	0.00317209	0.0172755	0.0242234	0.0397099	0.0210825	0.0351161	0.0154343	0.0187137	0.0155092	0.0250123	0.0241056	0.0172096	0.0167812	0.0363433
9.43764	0.022885	0.00300769	0.0233634	0.00315361	0.0169987	0.0237636	0.0390435	0.0206403	0.0343426	0.0149508	0.0183925	0.0149482	0.0245622	0.0232712	0.0167415	0.0164223	0.0358196
9.54738	0.0224155	0.00304316	0.022959	0.0031318	0.016403	0.0235452	0.0386962	0.0198861	0.0340906	0.014404	0.017696	0.0146025	0.0243541	0.0227409	0.0162392	0.0161731	0.035288
9.65712	0.0220621	0.00306862	0.022372	0.00307124	0.0161145	0.0229839	0.0388249	0.0195245	0.0334683	0.0139786	0.017406	0.0141961	0.0237352	0.0223327	0.0157771	0.0156117	0.0344036
9.76686	0.0215562	0.00305564	0.0219085	0.0030774	0.0156587	0.0227657	0.0380299	0.018974	0.0330785	0.0134531	0.016854	0.0136356	0.0230643	0.021882	0.015297	0.0152507	0.0340487
9.8766	0.0210648	0.00303725	0.0214817	0.00311626	0.015135	0.0222548	0.0376745	0.0183344	0.0322708	0.0130826	0.0164266	0.01334	0.0228567	0.0212154	0.0147423	0.0148222	0.0337719
9.98634	0.0206974	0.00299599	0.0210171	0.00319381	0.0147064	0.0215815	0.0369988	0.0180766	0.031952	0.0128274	0.0163123	0.0131243	0.0221138	0.0205894	0.0143692	0.0142201	0.0337933
10.0961	0.020244	0.00300242	0.0205904	0.00321108	0.014384	0.021208	0.0368116	0.0173022	0.0312543	0.0124164	0.0158795	0.0126959	0.0215164	0.0201593	0.0139151	0.0138551	0.0335058
10.2058	0.0197908	0.00301966	0.0201989	0.00323355	0.0139225	0.0209506	0.0364892	0.0168431	0.0307562	0.0119056	0.015208	0.0122509	0.0212477	0.0196582	0.0134281	0.0134676	0.0331931
10.3156	0.0193381	0.00301195	0.0197019	0.00320335	0.0136997	0.0202995	0.0357961	0.0163611	0.0306281	0.0114714	0.0146474	0.0118014	0.0206744	0.0191626	0.0130485	0.0130221	0.032602
10.4253	0.018994	0.00304771	0.019425	0.00323323	0.0133089	0.0200584	0.0358371	0.0158691	0.0301534	0.0110594	0.0142729	0.011393	0.0205607	0.0186178	0.0126487	0.0128333	0.0324647
10.535	0.018529	0.00301683	0.0188548	0.00310628	0.0128854	0.0198419	0.0352109	0.0154552	0.029434	0.0105651	0.0138651	0.010974	0.0199964	0.0182615	0.0122557	0.0124539	0.0313067
10.6448	0.0181981	0.00301083	0.0184467	0.00312255	0.0126079	0.019253	0.0348168	0.0150849	0.0292408	0.0102702	0.0135894	0.0107218	0.0195697	0.0177447	0.0119032	0.0120096	0.0310066
10.7545	0.0178742	0.003003	0.0180318	0.00306123	0.0124577	0.0189235	0.0343349	0.0148573	0.0290104	0.00987945	0.0131946	0.0103358	0.0191235	0.0173365	0.0115364	0.0118126	0.0303498
10.8643	0.0175141	0.00300641	0.0177825	0.00308681	0.012117	0.0187988	0.0341165	0.0141233	0.0284845	0.00964015	0.0128009	0.0100318	0.0189143	0.0172242	0.0112024	0.0114243	0.0301475
10.974	0.0171551	0.00296976	0.0174644	0.00308917	0.0117181	0.0181788	0.0336874	0.0140698	0.0278724	0.00933362	0.0125703	0.00981043	0.0185056	0.0168969	0.0109537	0.0110873	0.0298786
11.0837	0.0168915	0.00297519	0.0171798	0.00311028	0.0114855	0.0178237	0.0334677	0.0136342	0.0276798	0.00910704	0.0123549	0.00957909	0.0181633	0.0165858	0.0106555	0.0107831	0.0297114
11.1935	0.0165812	0.0029542	0.0170003	0.00315722	0.0112055	0.0174424	0.0330702	0.0132494	0.0273019	0.00890096	0.0121102	0.00936932	0.0180392	0.0162368	0.0104038	0.0105677	0.0297537
11.3032	0.0163572	0.00297523	0.0166062	0.00313106	0.0109954	0.0171602	0.0328874	0.012868	0.0273147	0.00865286	0.0117984	0.00918037	0.0176161	0.0157892	0.0100961	0.0102498	0.0292796
11.413	0.0161207	0.0029626	0.0163444	0.00313681	0.0109178	0.0171207	0.0324544	0.012598	0.0271059	0.00834698	0.011535	0.00888717	0.0173265	0.015543	0.00980445	0.0100006	0.0290475
11.5227	0.0157715	0.00294484	0.0160492	0.0031311	0.0105833	0.0169729	0.0322556	0.0121683	0.0262976	0.0080681	0.0111711	0.00865508	0.0171585	0.0150079	0.00946796	0.00986495	0.0287465
11.6324	0.015547	0.00295311	0.0158253	0.00314669	0.010193	0.0167313	0.0320625	0.0119397	0.0261298	0.0078097	0.011048	0.00846228	0.0166815	0.0148125	0.00928716	0.00966951	0.028676
11.7422	0.0152543	0.00295872	0.015618	0.00319578	0.00996333	0.0162439	0.0318215	0.0116686	0.0259143	0.00752173	0.0107085	0.00819283	0.0165487	0.0145536	0.00902923	0.00930147	0.028657
11.8519	0.0151692	0.002925	0.0154101	0.00320518	0.0106692	0.0159728	0.0316598	0.0113891	0.0255945	0.00737291	0.0106094	0.0080858	0.0162352	0.0144111	0.00883251	0.00906247	0.0285095
11.9617	0.0151864	0.00293876	0.0152766	0.00317009	0.0107354	0.0168731	0.0316238	0.0112426	0.0254528	0.00716502	0.0104014	0.00799697	0.0164482	0.0141295	0.00864526	0.00902102	0.028139

## Sheet: Fig_2D
Figure 2D
	Baseline Lifetime (ns)
	Plpwt/y	Plpnull/y
n = 1	1.562	1.897
n = 2	1.542	1.76
n = 3	1.775	1.736
n = 4	1.669	1.72
n = 5	1.589	1.779
n = 6	1.634	1.811
n = 7	1.63	1.854
n = 8	1.671	1.942
n = 9	1.677

## Sheet: Fig_2E
Figure 2E
	MB+GD Lifetime (ns)
	Plpwt/y	Plpnull/y
n = 1	1.96568	1.94494
n = 2	2.02999	1.94919
n = 3	2.00566	1.89188
n = 4	1.99364	1.95215
n = 5	2.043	1.978
n = 6	2.029	2.078
n = 7	1.987
n = 8	2.104

## Sheet: Fig_2F
Figure 2F
	Coefficient of Variation of lifetime (pixels within axon)
	Plpwt/y	Plpnull/y
axon = 1	0.3012	0.469978
axon = 2	0.365563	0.422488
axon = 3	0.342255	0.436112
axon = 4	0.382808	0.615272
axon = 5	0.465597	0.578269
axon = 6	0.360388	0.499115
axon = 7	0.313422	0.448201
axon = 8	0.326854	0.415647
axon = 9	0.588957	0.513891
axon = 10	0.446959	0.97449
axon = 11	0.47582	0.96787
axon = 12	0.486168	0.95968
axon = 13	0.4481	0.93533
axon = 14	0.404898	0.937243
axon = 15	0.455653	0.958558
axon = 16	0.470741	1.0102
axon = 17	0.501006	0.994059
axon = 18	0.469598	0.982455
axon = 19	0.440516	0.991136
axon = 20	0.540566	0.840148
axon = 21	0.410071	0.861003
axon = 22	0.457132	0.845441
axon = 23	0.448886	0.870477
axon = 24	0.501374	0.921222
axon = 25	0.482996	0.919348
axon = 26	0.447218	0.891588
axon = 27	0.539358	0.891124
axon = 28	0.402608	0.859482
axon = 29	0.524841	0.816437
axon = 30	0.61569	0.540614
axon = 31	0.531744	0.341715
axon = 32	0.556295	0.428461
axon = 33	0.59753	0.430579
axon = 34	0.659544	0.403009
axon = 35	0.644575	0.399515
axon = 36	0.573186	0.691221
axon = 37	0.712474	0.507533
axon = 38	0.573873	0.462182
axon = 39	0.287831	0.582492
axon = 40	0.403677	0.921763
axon = 41	0.375223	0.806062
axon = 42	0.39293	0.777063
axon = 43	0.325003	0.629997
axon = 44	0.404866	0.738287
axon = 45	0.429938	0.715518
axon = 46	0.42912	0.736666
axon = 47	0.40134	0.779703
axon = 48	0.353486	0.704854
axon = 49	0.699625	0.732355
axon = 50	0.676425	0.375437
axon = 51	0.689553	0.452817
axon = 52	0.644236	0.384643
axon = 53	0.709537	0.387176
axon = 54	0.639011	0.321227
axon = 55	0.574193	0.439537
axon = 56	0.761081	0.666452
axon = 57	0.736981	0.559685
axon = 58	0.668777	0.524303
axon = 59	0.320302	0.355688
axon = 60	0.346583	0.566139
axon = 61	0.378531	0.546122
axon = 62	0.443126	0.562394
axon = 63	0.365471	0.59559
axon = 64	0.355153	0.553243
axon = 65	0.370452	0.575873
axon = 66	0.347695	0.603133
axon = 67	0.396671	0.621542
axon = 68	0.388326	0.63685
axon = 69	0.429159	0.586874
axon = 70	0.403426	0.592949
axon = 71	0.406594	0.620232
axon = 72	0.436627	0.601738
axon = 73	0.422649	0.602719
axon = 74	0.381676	0.604703
axon = 75	0.529628	0.583192
axon = 76	0.463167	0.572837
axon = 77	0.380495	0.579542
axon = 78	0.484094	0.581009
axon = 79	0.466714	0.610738
axon = 80	0.469178
axon = 81	0.489702
axon = 82	0.496301
axon = 83	0.522731
axon = 84	0.492891
axon = 85	0.520225
axon = 86	0.463879
axon = 87	0.507977
axon = 88	0.517614

## Sheet: Fig_2G
Figure 2G
	Coefficient of Variation of lifetime (axons within nerve)
	Plpwt/y	Plpnull/y
n = 1	0.00892097	0.0202584
n = 2	0.0346178	0.072393
n = 3	0.0121174	0.0349041
n = 4	0.032355	0.0281371
n = 5	0.016047	0.0493775
n = 6	0.0207476	0.0704745
n = 7	0.0134848	0.050157
n = 8	0.0316008	0.0465993
n = 9	0.0295169

[truncated: 29 more sheets: Fig_3A, Fig_3B, Fig_3C, Fig_3D, Fig_4A, Fig_4B, Fig_4C, Fig_4D, Fig_4E, Fig_4F, Fig_4G, Fig_4H, Fig_5D, Fig_5E, Fig_5F, Fig_6B, Fig_6C, Fig_6D, Fig_6E, Fig_S2 …]
